# Supplementary material for: Rhodium(iii)-catalyzed cyanation of vinylic C–H bonds: N-cyano-N-phenyl-p-toluenesulfonamide as a cyanation reagent
Source: Royal Society of Chemistry journal article supplement (doi:10.1039/c4cc09790d), 2015-01-01
Supplement: c4cc09790d1.pdf [file c4cc09790d1.pdf]

## Supporting Information

# **Rhodium(III)-catalyzed Cyanation of Vinylic C-H Bonds : N-Cyano-N- phenyl-p-toluenesulfonamide as cyanation reagent**

*Wei Su,<sup>+</sup> Tian-Jun Gong,<sup>+</sup> Bin Xiao, Yao Fu\**

Department of Chemistry, University of Science and Technology of China, Hefei 230026, China

### **I. General Remark**

### **II. General Procedure for the Preparation of Starting Materials**

### **III. General Procedure for Rhodium-Catalyzed C-H Cyanation**

### **IV. NMR Spectra of Products**

### **V. X-ray Crystal data**

### **VI. Deuterium Exchange Experiments**

## I. General Remark:

All solvents were obtained from commercial suppliers and used without further purification.  $[\text{RhCp}^*(\text{CH}_3\text{CN})_3](\text{SbF}_6)_2$  was prepared according to the literature<sup>[1]</sup>. Analytical TLC was done on pre-coated silica gel plates. Column chromatography was conducted with 300-400 mesh silica gel.  $^1\text{H}$  NMR spectra were recorded on 400 MHz spectrometers. Chemical shifts of  $^1\text{H}$  NMR spectra were reported in parts per million relative to tetramethylsilane ( $\delta = 0$ ). The following abbreviations were used to describe peak splitting patterns when appropriate: s = singlet, d = doublet, t = triplet, q = quartet, m = multiplet, dd = doublet of doublet. Coupling constants,  $J$ , were reported in hertz unit (Hz).  $^{13}\text{C}$  NMR spectra were recorded on 101 MHz spectrometers. Chemical shifts were reported in parts per million relative to tetramethylsilane ( $\delta = 0$ ). High-resolution mass spectra (HRMS) were recorded on a BRUKER VPEXII spectrometer with EI and ESI mode unless otherwise stated.

## II. General Procedure for the Preparation of Starting Materials

### A. Synthesis of *N*-cyano-*N*-phenyl-*p*-toluenesulfonamide (NCTS)<sup>[2]</sup>:

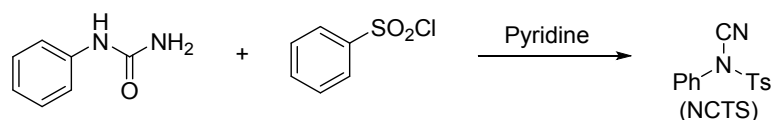

### B. General procedure for the preparation of acrylamide.

Acrylamides (**1a**, **1b**, **1o** and **e**) was synthesized following the known literature procedures<sup>[3]</sup> and the other acrylamides synthesized from 2-Bromo-*N,N*-diisopropylacrylamide(**e**) and arylboronic acids by Suzuki reactions. To a 1,4-dioxane solution (3mL/mmol) of the 2-Bromo-*N,N*-diisopropylacrylamide (1 mmol) were added potassium phosphate ( $\text{K}_3\text{PO}_4$ , 3 equiv), the boronic acid  $\text{ArB}(\text{OH})_2$  (1.5 equiv), and  $\text{Pd}(\text{PPh}_3)_4$  (0.05 equiv) at 20 °C. The reaction mixture was heated and stirred at reflux for 6 h. The reaction mixture was then allowed to cool to ambient temperature, and diethyl ether (10mL/mmol) was added. The precipitate was filtered off, washed with diethyl ether, and the filtrate was concentrated in vacuo. The residue was purified by chromatography (silica gel, petroleum ether/EtOAc) to give the aryl-substituted diisopropylacrylamide.

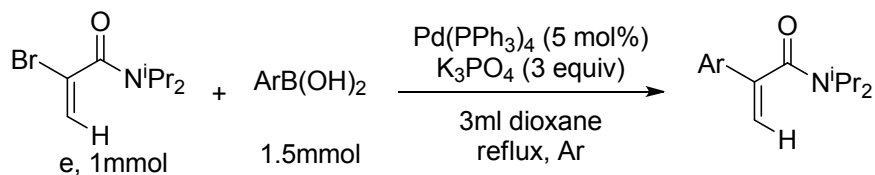

### C. General procedure for the preparation of O-methyl oximes and Pyridines.

O-methyl oximes(**4a**, **4d**) was synthesized following the known literature procedures<sup>[4]</sup>.

Pyridines(**4b**, **4c**) was synthesized following the known literature procedures<sup>[5]</sup>.

### III. General Procedure for Rhodium-Catalyzed C-H Cyanation

A 10mL Schlenk tube equipped with a magnetic stirrer was charged with  $[\text{Cp}^*\text{Rh}(\text{CH}_3\text{CN})_3](\text{SbF}_6)_2$  (10 mol%), NaOAc (20 mol%),  $\text{Ag}_2\text{CO}_3$  (20 mol%), N-cyano-N-phenyl-p-toluenesulfonamide **2** (0.2 mmol). The tube was evacuated and backfilled with argon for three times. Then acrylamide or O-methyl oxime (0.1 mmol) in DCE (0.5 mL) was added. After addition of all substrates, the reaction mixture was stirred and heated at 120°C for 24h. Then reaction was cooled to room temperature. Solvent and volatile reagents were removed by rotary evaporation and the residue was purified by flash column chromatography on silica gel to give the target product.

### IV. NMR Spectra of Products

**N,N-diisopropyl-2-phenylacrylamide (1a):**

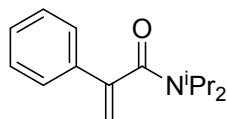

$^1\text{H}$  NMR (400 MHz,  $\text{CDCl}_3$ )  $\delta$  7.61 – 7.41 (m, 2H), 7.43 – 7.25 (m, 3H), 5.62 (s, 1H), 5.25 (s, 1H), 3.98 (dt,  $J = 13.4, 6.7$  Hz, 1H), 3.43 (dt,  $J = 13.6, 6.8$  Hz, 1H), 1.54 (d,  $J = 6.8$  Hz, 6H), 1.01 (d,  $J = 6.7$  Hz, 6H).

$^{13}\text{C}$  NMR (101 MHz,  $\text{CDCl}_3$ )  $\delta$  170.05, 146.73, 135.87, 128.69, 128.39, 125.62, 111.51, 50.65, 45.56, 20.44, 20.38.

**N,N-diethyl-2-phenylacrylamide (1b):**

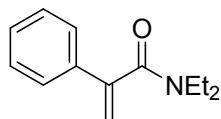

$^1\text{H}$  NMR (400 MHz,  $\text{CDCl}_3$ )  $\delta$  7.44 (m, 2H), 7.39 – 7.29 (m, 3H), 5.69 (s, 1H), 5.32 (s, 1H), 3.51 (q,  $J = 7.1$  Hz, 1H), 3.23 (q,  $J = 7.1$  Hz, 1H), 1.22 (t,  $J = 7.1$  Hz, 6H), 1.00 (t,  $J = 7.1$  Hz, 6H).

$^{13}\text{C}$  NMR (101 MHz,  $\text{CDCl}_3$ )  $\delta$  170.21, 145.48, 135.72, 128.75, 128.50, 125.57, 112.96, 42.75, 38.76, 13.97, 12.78.

**N,N-diisopropyl-2-(4-methoxyphenyl)acrylamide (1c):**

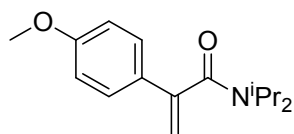

$^1\text{H}$  NMR (400 MHz,  $\text{CDCl}_3$ )  $\delta$  7.54 – 7.30 (m, 2H), 7.11 – 6.61 (m, 2H), 5.50 (s, 1H), 5.13 (s, 1H), 3.99 (dt,  $J$  = 13.3, 6.7 Hz, 1H), 3.81 (s, 3H), 3.43 (dt,  $J$  = 13.6, 6.8 Hz, 1H), 1.54 (d,  $J$  = 6.8 Hz, 6H), 1.02 (d,  $J$  = 6.7 Hz, 6H).

$^{13}\text{C}$  NMR (101 MHz,  $\text{CDCl}_3$ )  $\delta$  170.46, 159.78, 145.88, 128.41, 126.93, 114.06, 109.57, 55.30, 50.72, 45.61, 20.45, 20.42.

HRMS calcd for  $\text{C}_{16}\text{H}_{23}\text{NO}_2[\text{Na}^+]$ : 284.1626; found: 284.1621.

**2-(3-chlorophenyl)-N,N-diisopropylacrylamide (1d):**

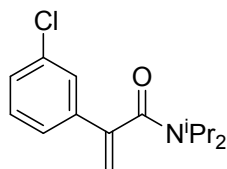

$^1\text{H}$  NMR (400 MHz,  $\text{CDCl}_3$ )  $\delta$  7.45 (d,  $J$  = 1.1 Hz, 1H), 7.37 – 7.20 (m, 3H), 5.64 (s, 1H), 5.31 (s, 1H), 3.94 (dt,  $J$  = 13.3, 6.7 Hz, 1H), 3.44 (dt,  $J$  = 13.6, 6.8 Hz, 1H), 1.54 (d,  $J$  = 6.8 Hz, 6H), 1.03 (d,  $J$  = 6.7 Hz, 6H).

$^{13}\text{C}$  NMR (101 MHz,  $\text{CDCl}_3$ )  $\delta$  169.49, 145.12, 137.60, 134.72, 130.01, 128.50, 125.67, 123.89, 113.12, 50.86, 45.81, 20.36.

HRMS calcd for  $\text{C}_{15}\text{H}_{20}\text{NOCl}[\text{Na}^+]$ : 288.1131; found: 288.1129.

**methyl 4-(3-(diisopropylamino)-3-oxoprop-1-en-2-yl)benzoate (1e):**

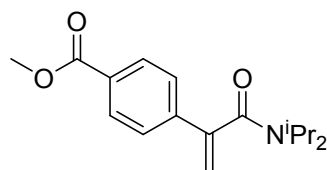

$^1\text{H}$  NMR (400 MHz,  $\text{CDCl}_3$ )  $\delta$  8.03 (d,  $J$  = 8.2 Hz, 2H), 7.52 (d,  $J$  = 8.2 Hz, 2H), 5.73 (s, 1H), 5.38 (s, 1H), 4.10 – 3.77 (m, 4H), 3.66 – 3.27 (m, 1H), 1.54 (d,  $J$  = 6.7 Hz, 6H), 1.01 (d,  $J$  = 6.5 Hz, 6H).

$^{13}\text{C}$  NMR (101 MHz,  $\text{CDCl}_3$ )  $\delta$  170.47, 167.74, 146.94, 141.28, 141.28, 131.14, 130.98, 126.68, 53.25, 51.85, 46.80, 21.46.

HRMS calcd for  $\text{C}_{17}\text{H}_{23}\text{NO}_3[\text{Na}^+]$ : 312.1576 ; found: 312.1574.

**2-(benzo[d][1,3]dioxol-5-yl)-N,N-diisopropylacrylamide (1f):**

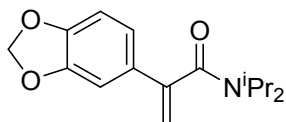

$^1\text{H}$  NMR (400 MHz,  $\text{CDCl}_3$ )  $\delta$  6.97 (s, 1H), 6.90 (d,  $J = 8.1$  Hz, 1H), 6.78 (d,  $J = 8.1$  Hz, 1H), 5.97 (s, 2H), 5.49 (s, 1H), 5.16 (s, 1H), 3.99 (dt,  $J = 13.3, 6.7$  Hz, 1H), 3.44 (dt,  $J = 13.6, 6.8$  Hz, 1H), 1.53 (d,  $J = 6.8$  Hz, 6H), 1.04 (d,  $J = 6.7$  Hz, 6H).

$^{13}\text{C}$  NMR (101 MHz,  $\text{CDCl}_3$ )  $\delta$  170.26, 148.11, 147.88, 145.75, 130.04, 119.94, 110.39, 108.36, 105.69, 101.25, 50.81, 45.73, 20.39.

HRMS calcd for  $\text{C}_{16}\text{H}_{21}\text{NO}_3[\text{Na}^+]$ : 298.1419; found: 298.1416.

**N,N-diisopropyl-2-(4-(trifluoromethoxy)phenyl)acrylamide (1g):**

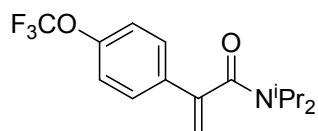

$^1\text{H}$  NMR (400 MHz,  $\text{CDCl}_3$ )  $\delta$  7.51 – 7.43 (m, 2H), 7.20 (d,  $J = 8.7$  Hz, 2H), 5.61 (s, 1H), 5.29 (s, 1H), 3.97 (dt,  $J = 13.3, 6.6$  Hz, 1H), 3.44 (dt,  $J = 13.6, 6.8$  Hz, 1H), 1.53 (d,  $J = 6.8$  Hz, 6H), 1.03 (d,  $J = 6.7$  Hz, 6H).

$^{13}\text{C}$  NMR (101 MHz,  $\text{CDCl}_3$ )  $\delta$  169.56, 149.20, 145.25, 134.61, 127.14, 121.13, 120.42 (q,  $J = 255.7$  Hz), 112.41, 50.78, 45.72, 20.42.

$^{19}\text{F}$  NMR (376 MHz,  $\text{CDCl}_3$ )  $\delta$  -57.84.

HRMS calcd for  $\text{C}_{16}\text{H}_{20}\text{NO}_2\text{F}_3[\text{Na}^+]$ : 338.1344; found: 338.1340.

**2-(3-fluorophenyl)-4-isopropyl-5-methylhex-1-en-3-one (1h):**

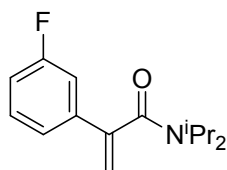

$^1\text{H}$  NMR (400 MHz,  $\text{CDCl}_3$ )  $\delta$  7.32 (m, 1H), 7.22 (d,  $J = 7.9$  Hz, 1H), 7.20 – 7.13 (m, 1H), 7.00 (m, 1H), 5.64 (s, 1H), 5.30 (s, 1H), 3.96 (dt,  $J = 13.3, 6.7$  Hz, 1H), 3.44 (dt,  $J = 13.6, 6.8$  Hz, 1H), 1.54 (d,  $J = 6.8$  Hz, 6H), 1.03 (d,  $J = 6.7$  Hz, 6H).

$^{13}\text{C}$  NMR (101 MHz,  $\text{CDCl}_3$ )  $\delta$  169.53, 163.04 (d,  $J = 246.0$  Hz), 145.43 (d,  $J = 2.4$  Hz), 138.08 (d,  $J = 7.6$  Hz), 130.28 (d,  $J = 8.3$  Hz), 121.44 (d,  $J = 2.9$  Hz), 115.36 (d,  $J = 21.3$  Hz), 112.87, 112.50 (d,  $J = 22.5$  Hz), 50.82, 45.77, 20.38.

$^{19}\text{F}$  NMR (376 MHz,  $\text{CDCl}_3$ )  $\delta$  -112.59.

HRMS calcd for  $\text{C}_{15}\text{H}_{20}\text{NOF}[\text{Na}^+]$ : 272.1427; found: 272.1422.

**N,N-diisopropyl-2-(4-(trifluoromethyl)phenyl)acrylamide (1i):**

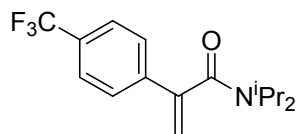

$^1\text{H}$  NMR (400 MHz,  $\text{CDCl}_3$ )  $\delta$  7.62 (d,  $J = 8.3$  Hz, 2H), 7.57 (d,  $J = 8.4$  Hz, 2H), 5.72 (s, 1H), 5.38 (s, 1H), 3.95 (dt,  $J = 13.2, 6.6$  Hz, 1H), 3.45 (dt,  $J = 13.4, 6.7$  Hz, 1H), 1.54 (d,  $J = 6.8$  Hz, 6H), 1.03 (d,  $J = 6.6$  Hz, 6H).

$^{13}\text{C}$  NMR (101 MHz,  $\text{CDCl}_3$ )  $\delta$  169.30, 145.39, 139.38, 130.35 (q,  $J = 32.6$  Hz), 125.97, 125.76 (q,  $J = 3.7$  Hz), 124.02 (q,  $J = 270$  Hz), 113.91, 50.84, 45.80, 20.44, 20.40.

$^{19}\text{F}$  NMR (376 MHz,  $\text{CDCl}_3$ )  $\delta$  -62.66.

HRMS calcd for  $\text{C}_{16}\text{H}_{20}\text{NOF}_3$  [ $\text{Na}^+$ ]: 322.1395; found: 322.1398.

**N,N-diisopropyl-2-(3-nitrophenyl)acrylamide (1j):**

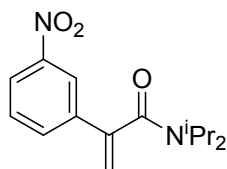

$^1\text{H}$  NMR (400 MHz,  $\text{CDCl}_3$ )  $\delta$  8.33 (t,  $J = 1.8$  Hz, 1H), 8.18 (dd,  $J = 8.2, 1.3$  Hz, 1H), 7.79 (d,  $J = 7.8$  Hz, 1H), 7.55 (t,  $J = 8.0$  Hz, 1H), 5.79 (s, 1H), 5.44 (s, 1H), 3.96 (dt,  $J = 13.2, 6.6$  Hz, 1H), 3.48 (dt,  $J = 13.5, 6.7$  Hz, 1H), 1.56 (d,  $J = 6.7$  Hz, 6H), 1.06 (d,  $J = 6.6$  Hz, 6H).

$^{13}\text{C}$  NMR (101 MHz,  $\text{CDCl}_3$ )  $\delta$  168.84, 148.66, 144.33, 137.61, 131.56, 129.82, 123.16, 120.52, 114.29, 50.97, 45.96, 20.51, 20.39.

HRMS calcd for  $\text{C}_{15}\text{H}_{20}\text{N}_2\text{O}_3$  [ $\text{Na}^+$ ]: 299.1372; found: 299.1368.

**2-(3-acetylphenyl)-N,N-diisopropylacrylamide (1k):**

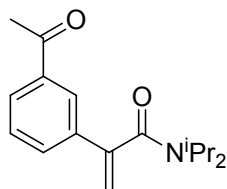

$^1\text{H}$  NMR (400 MHz,  $\text{CDCl}_3$ )  $\delta$  8.05 (t,  $J = 1.7$  Hz, 1H), 7.95 – 7.84 (m, 1H), 7.67 (ddd,  $J = 7.8, 1.7, 1.1$  Hz, 1H), 7.47 (t,  $J = 7.8$  Hz, 1H), 5.72 (s, 1H), 5.35 (s, 1H), 3.97 (dt,  $J = 13.3, 6.6$  Hz, 1H), 3.46 (dt,  $J = 13.6, 6.8$  Hz, 1H), 2.61 (s, 3H), 1.56 (d,  $J = 6.8$  Hz, 6H), 1.02 (d,  $J = 6.7$  Hz, 6H).

$^{13}\text{C}$  NMR (101 MHz,  $\text{CDCl}_3$ )  $\delta$  197.77, 169.55, 145.70, 137.54, 136.41, 130.13, 129.07, 128.23, 125.48, 112.76, 50.80, 45.71, 26.68, 20.42.

HRMS calcd for  $\text{C}_{17}\text{H}_{23}\text{NO}_2$  [ $\text{Na}^+$ ]: 296.1626; found: 296.1626.

**N,N-diisopropyl-2-(naphthalen-2-yl)acrylamide (1l):**

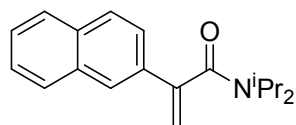

$^1\text{H NMR}$  (400 MHz,  $\text{CDCl}_3$ )  $\delta$  8.01 – 7.73 (m, 4H), 7.63 (dd,  $J = 8.6, 1.8$  Hz, 1H), 7.53 – 7.33 (m, 2H), 5.76 (s, 1H), 5.36 (s, 1H), 4.03 (dt,  $J = 13.4, 6.7$  Hz, 1H), 3.47 (dt,  $J = 13.6, 6.8$  Hz, 1H), 1.60 (d,  $J = 6.8$  Hz, 6H), 1.00 (d,  $J = 6.7$  Hz, 6H).

$^{13}\text{C NMR}$  (101 MHz,  $\text{CDCl}_3$ )  $\delta$  170.16, 146.54, 133.32, 133.21, 133.05, 128.47, 128.39, 127.61, 126.38 (2C), 125.24, 123.07, 112.01, 50.79, 45.69, 20.49, 20.42.

HRMS calcd for  $\text{C}_{19}\text{H}_{23}\text{NO}[\text{Na}^+]$ : 304.1677; found: 304.1672.

**2-(furan-3-yl)-N,N-diisopropylacrylamide (1m):**

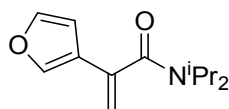

$^1\text{H NMR}$  (400 MHz,  $\text{CDCl}_3$ )  $\delta$  7.43 (s, 1H), 7.39 (t,  $J = 1.6$  Hz, 1H), 6.62 – 6.52 (m, 1H), 5.39 (s, 1H), 5.09 (s, 1H), 4.23 – 3.88 (m, 1H), 3.88 – 3.22 (m, 1H), 1.52 (d,  $J = 6.2$  Hz, 6H), 1.11 (d,  $J = 6.0$  Hz, 6H).

$^{13}\text{C NMR}$  (101 MHz,  $\text{CDCl}_3$ )  $\delta$  169.57, 143.69, 140.31, 137.98, 122.99, 110.04, 107.57, 50.73, 45.65, 20.62, 20.44.

HRMS calcd for  $\text{C}_{13}\text{H}_{19}\text{NO}_2[\text{Na}^+]$ : 244.1313; found: 244.1309.

**2-(dibenzo[b,d]furan-4-yl)-N,N-diisopropylacrylamide (1n):**

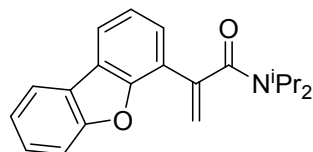

$^1\text{H NMR}$  (400 MHz,  $\text{CDCl}_3$ )  $\delta$  7.96 (d,  $J = 7.6$  Hz, 1H), 7.90 (dd,  $J = 7.6, 1.0$  Hz, 1H), 7.59 (d,  $J = 8.2$  Hz, 1H), 7.47 (m, 2H), 7.35 (m, 2H), 6.34 (s, 1H), 5.64 (s, 1H), 4.36 – 3.83 (m, 1H), 3.48 (m, 1H), 1.60 (d,  $J = 6.8$  Hz, 6H), 1.03 (d,  $J = 6.7$  Hz, 6H).

$^{13}\text{C NMR}$  (101 MHz,  $\text{CDCl}_3$ )  $\delta$  169.94, 155.99, 153.25, 142.21, 127.31, 125.94, 125.06, 123.83, 122.98, 122.95, 120.90, 120.68, 120.62, 116.63, 111.75, 50.87, 45.76, 20.43, 20.33.

HRMS calcd for  $\text{C}_{21}\text{H}_{23}\text{NO}_2[\text{Na}^+]$ : 344.1626; found: 344.1628.

**N,N-diisopropylmethacrylamide (1o):**

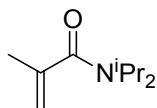

$^1\text{H NMR}$  (400 MHz,  $\text{CDCl}_3$ )  $\delta$  5.01 (d,  $J = 1.4$  Hz, 1H), 4.92 (d,  $J = 1.0$  Hz, 1H), 4.11 (s, 1H), 3.41 (s, 1H), 2.06 – 1.83 (m, 3H), 1.30 (d,  $J = 84.8$  Hz, 12H).

$^{13}\text{C NMR}$  (101 MHz,  $\text{CDCl}_3$ )  $\delta$  172.07, 142.94, 112.51, 50.28, 45.27, 20.54.

**(E)-1-(cyclohex-1-en-1-yl)ethanone O-methyl oxime (4a):**

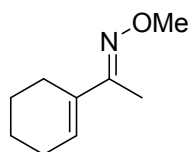

$^1\text{H NMR}$  (400 MHz,  $\text{CDCl}_3$ )  $\delta$  6.12 (m, 1H), 3.88 (s, 3H), 2.36 – 2.23 (m, 2H), 2.17 (m, 2H), 1.93 (s, 3H), 1.82 – 1.29 (m, 4H).

$^{13}\text{C NMR}$  (101 MHz,  $\text{CDCl}_3$ )  $\delta$  156.08, 134.89, 129.01, 61.52, 25.98, 24.50, 22.46, 22.20, 10.33.

**(3S,8R,9S,10R,13S,14S)-17-((E)-1-(methoxyimino)ethyl)-10,13-dimethyl-2,3,4,7,8,9,10,11,12,13,14,15-dodecahydro-1H-cyclopenta[a]phenanthren-3-yl acetate (4d):**

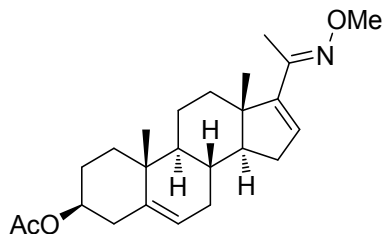

$^1\text{H NMR}$  (400 MHz,  $\text{CDCl}_3$ )  $\delta$  6.00 (s, 1H), 5.40 (d,  $J = 3.7$  Hz, 1H), 4.91 – 4.41 (m, 1H), 3.88 (s, 3H), 2.51 (d,  $J = 12.4$  Hz, 1H), 2.34 (d,  $J = 6.1$  Hz, 2H), 2.25 – 2.15 (m, 1H), 2.04 (s, 3H), 2.04 – 1.82 (m, 7H), 1.65 (m, 15.6, 9.3 Hz, 6H), 1.50 – 1.33 (m, 2H), 1.21 – 1.10 (m, 1H), 1.06 (s, 3H), 0.97 (s, 3H).

$^{13}\text{C NMR}$  (101 MHz,  $\text{CDCl}_3$ )  $\delta$  170.56, 152.17, 151.68, 140.13, 131.88, 122.34, 73.96, 61.66, 57.01, 50.40, 46.70, 38.17, 36.90, 36.79, 35.63, 31.61 (2C), 30.30, 27.78, 21.47, 20.87, 19.23, 15.86, 11.76.

HRMS calcd for  $\text{C}_{24}\text{H}_{35}\text{NO}_2[\text{Na}^+]$ : 408.2515; found: 408.2511.

### III. General Procedure for Rhodium-Catalyzed C-H Cyanation and NMR Spectra of Products

**(Z)-3-cyano-N,N-diisopropyl-2-phenylacrylamide (3a):**



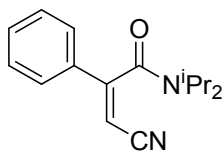

$^1\text{H}$  NMR (400 MHz,  $\text{CDCl}_3$ )  $\delta$  7.72 – 7.35 (m, 5H), 5.76 (s, 1H), 3.75 (dt,  $J = 13.3, 6.6$  Hz, 1H), 3.53 (dt,  $J = 13.7, 6.8$  Hz, 1H), 1.61 (d,  $J = 6.8$  Hz, 6H), 1.12 (s, 6H).

$^{13}\text{C}$  NMR (101 MHz,  $\text{CDCl}_3$ )  $\delta$  165.31, 158.51, 132.32, 131.43, 129.32, 126.30, 116.37, 92.32), 51.45, 46.31, 20.67, 20.17.

HRMS calcd for  $\text{C}_{16}\text{H}_{20}\text{N}_2\text{O}[\text{Na}^+]$ : 279.1473; found: 279.1466.

**(Z)-3-cyano-N,N-diethyl-2-phenylacrylamide (3b):**

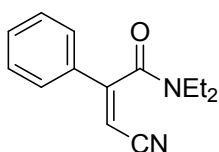

$^1\text{H}$  NMR (400 MHz,  $\text{CDCl}_3$ )  $\delta$  7.64 – 7.34 (m, 5H), 5.83 (s, 1H), 3.60 (q,  $J = 7.1$  Hz, 2H), 3.26 (q,  $J = 7.1$  Hz, 2H), 1.30 (t,  $J = 7.2$  Hz, 6H), 1.10 (t,  $J = 7.2$  Hz, 6H) (Note: Because of a trace of impurities in petroleum ether, the shape of peak is irregular.)

$^{13}\text{C}$  NMR (101 MHz,  $\text{CDCl}_3$ )  $\delta$  165.65, 157.98, 132.41, 131.51, 129.39, 126.33, 116.08, 93.87, 42.92, 39.03, 13.90, 12.57.

HRMS calcd for  $\text{C}_{14}\text{H}_{16}\text{N}_2\text{O} [\text{Na}^+]$ : 251.1160; found: 251.1163.

**(Z)-3-cyano-N,N-diisopropyl-2-(4-methoxyphenyl)acrylamide (3c):**

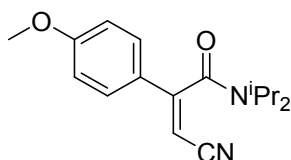

$^1\text{H}$  NMR (400 MHz,  $\text{CDCl}_3$ )  $\delta$  7.44 (d,  $J = 8.9$  Hz, 2H), 6.93 (d,  $J = 8.9$  Hz, 2H), 5.62 (s, 1H), 3.85 (s, 3H), 3.76 (dt,  $J = 13.2, 6.6$  Hz, 1H), 3.53 (dt,  $J = 13.6, 6.8$  Hz, 1H), 1.61 (d,  $J = 6.8$  Hz, 6H), 1.52 – 0.85 (m, 6H).

$^{13}\text{C}$  NMR (101 MHz,  $\text{CDCl}_3$ )  $\delta$  165.66, 162.17, 157.83, 128.10, 124.73, 116.81, 114.70, 89.56, 55.49, 51.45, 46.31, 20.74, 20.20.

HRMS calcd for  $\text{C}_{17}\text{H}_{22}\text{N}_2\text{O}_2[\text{Na}^+]$ : 309.1579; found: 309.1578.

**(Z)-2-(3-chlorophenyl)-3-cyano-N,N-diisopropylacrylamide (3d):**

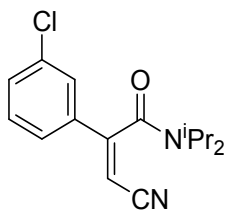

$^1\text{H}$  NMR (400 MHz,  $\text{CDCl}_3$ )  $\delta$  7.49 (s, 1H), 7.47 – 7.42 (m, 1H), 7.38 (m, 2H), 5.76 (s, 1H), 3.72 (dt,  $J$  = 13.2, 6.6 Hz, 1H), 3.54 (dt,  $J$  = 13.6, 6.8 Hz, 1H), 1.60 (d,  $J$  = 6.8 Hz, 6H), 1.14 (s, 6H).

$^{13}\text{C}$  NMR (101 MHz,  $\text{CDCl}_3$ )  $\delta$  164.67, 157.03, 135.45, 134.16, 131.34, 130.62, 126.21, 124.59, 115.90, 93.82, 51.56, 46.46, 20.74, 20.13.

HRMS calcd for  $\text{C}_{16}\text{H}_{19}\text{N}_2\text{OCl} [\text{Na}^+]$ : 313.1084; found: 313.1079.

**(Z)-methyl 4-(1-cyano-3-(diisopropylamino)-3-oxoprop-1-en-2-yl)benzoate (3c):**

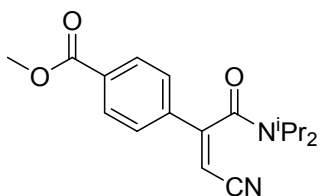

$^1\text{H}$  NMR (400 MHz,  $\text{CDCl}_3$ )  $\delta$  8.09 (d,  $J$  = 8.5 Hz, 2H), 7.58 (d,  $J$  = 8.5 Hz, 2H), 5.84 (s, 1H), 3.94 (s, 3H), 3.71 (dt,  $J$  = 13.2, 6.6 Hz, 1H), 3.54 (dt,  $J$  = 13.6, 6.8 Hz, 1H), 1.61 (d,  $J$  = 6.8 Hz, 6H), 1.33 – 0.96 (m, 6H).

$^{13}\text{C}$  NMR (101 MHz,  $\text{CDCl}_3$ )  $\delta$  166.02, 164.73, 157.39, 136.44, 132.47, 130.47, 126.32, 115.88, 94.55, 52.49, 51.56, 46.47, 20.71, 20.14.

HRMS calcd for  $\text{C}_{18}\text{H}_{22}\text{N}_2\text{O}_3 [\text{Na}^+]$ : 337.1528; found: 337.1530.

**(Z)-2-(benzo[d][1,3]dioxol-5-yl)-3-cyano-N,N-diisopropylacrylamide (3f):**

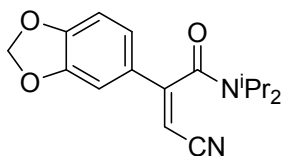

$^1\text{H}$  NMR (400 MHz,  $\text{CDCl}_3$ )  $\delta$  6.94 (dd,  $J$  = 8.2, 1.7 Hz, 1H), 6.90 (d,  $J$  = 1.6 Hz, 1H), 6.76 (d,  $J$  = 8.2 Hz, 1H), 5.97 (s, 2H), 5.51 (s, 1H), 3.67 (dt,  $J$  = 13.2, 6.6 Hz, 1H), 3.45 (dt,  $J$  = 13.6, 6.8 Hz, 1H), 1.53 (d,  $J$  = 6.8 Hz, 6H), 1.10 (s, 6H).

$^{13}\text{C}$  NMR (101 MHz,  $\text{CDCl}_3$ )  $\delta$  164.39, 156.85, 149.49, 147.70, 125.46, 121.11, 115.58, 107.81, 104.61, 100.94, 89.36, 50.45, 45.31, 20.04, 19.14.

HRMS calcd for  $\text{C}_{17}\text{H}_{20}\text{N}_2\text{O}_3 [\text{Na}^+]$ : 323.1372; found: 323.1377.

**(Z)-3-cyano-N,N-diisopropyl-2-(4-(trifluoromethoxy)phenyl)acrylamide (3g):**

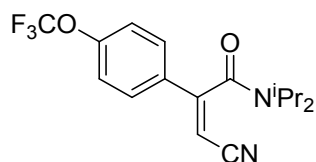

$^1\text{H NMR}$  (400 MHz,  $\text{CDCl}_3$ )  $\delta$  7.55 (d,  $J = 8.8$  Hz, 2H), 7.28 (d,  $J = 9.0$  Hz, 2H), 5.73 (s, 1H), 3.74 (dt,  $J = 13.2, 6.6$  Hz, 1H), 3.54 (dt,  $J = 13.6, 6.8$  Hz, 1H), 1.61 (d,  $J = 6.8$  Hz, 6H), 1.15 (s, 6H).

$^{13}\text{C NMR}$  (101 MHz,  $\text{CDCl}_3$ )  $\delta$  164.83 (s), 156.86 (s), 151.28 (s), 130.91 (s), 128.07 (s), 121.37 (s), 120.28 (q,  $J = 257$  Hz), 115.98 (s), 93.27 (s), 51.58 (s), 46.49 (s), 21.07 (s), 20.16 (s).

$^{19}\text{F NMR}$  (376 MHz,  $\text{CDCl}_3$ )  $\delta$  -57.72.

HRMS calcd for  $\text{C}_{17}\text{H}_{19}\text{N}_2\text{O}_2\text{F}_3[\text{Na}^+]$ : 363.1296; found: 363.1293.

**(Z)-3-cyano-2-(3-fluorophenyl)-N,N-diisopropylacrylamide (3h):**

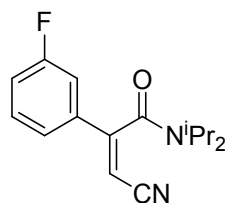

$^1\text{H NMR}$  (400 MHz,  $\text{CDCl}_3$ )  $\delta$  7.58 – 7.35 (m, 1H), 7.29 (d,  $J = 7.8$  Hz, 1H), 7.24 – 7.11 (m, 2H), 5.76 (s, 1H), 3.73 (dt,  $J = 13.2, 6.6$  Hz, 1H), 3.54 (dt,  $J = 13.6, 6.8$  Hz, 1H), 1.61 (d,  $J = 6.8$  Hz, 6H), 1.14 (s, 6H).

$^{13}\text{C NMR}$  (101 MHz,  $\text{CDCl}_3$ )  $\delta$  164.75, 163.02 (d,  $J = 248.4$  Hz), 157.22 (d,  $J = 2.6$  Hz), 134.55 (d,  $J = 7.7$  Hz), 131.06 (d,  $J = 8.3$  Hz), 122.21 (d,  $J = 3.0$  Hz), 118.40 (d,  $J = 21.3$  Hz), 115.93, 113.20 (d,  $J = 23.2$  Hz), 93.79, 51.57, 46.46, 20.74, 20.14.

$^{19}\text{F NMR}$  (376 MHz,  $\text{CDCl}_3$ )  $\delta$  -110.65 – -110.91 (m).

HRMS calcd for  $\text{C}_{16}\text{H}_{19}\text{N}_2\text{OF}[\text{Na}^+]$ : 297.1379; found: 297.1381.

**(Z)-3-cyano-N,N-diisopropyl-2-(4-(trifluoromethyl)phenyl)acrylamide (3i):**

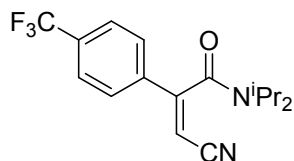

$^1\text{H NMR}$  (400 MHz,  $\text{CDCl}_3$ )  $\delta$  7.70 (d,  $J = 8.3$  Hz, 2H), 7.63 (d,  $J = 8.3$  Hz, 2H), 5.84 (s, 1H), 3.72 (dt,  $J = 13.2, 6.6$  Hz, 1H), 3.55 (dt,  $J = 13.6, 6.8$  Hz, 1H), 1.61 (d,  $J = 6.8$  Hz, 6H), 1.14 (s, 6H).

$^{13}\text{C NMR}$  (101 MHz,  $\text{CDCl}_3$ )  $\delta$  164.56, 156.93, 135.83, 132.92 (q,  $J = 33.0$  Hz), 126.70, 126.35 (q,  $J = 3.7$  Hz), 123.5 (q,  $J = 271.0$  Hz), 115.73, 94.89, 51.62, 46.52, 20.77, 20.13.

$^{19}\text{F NMR}$  (376 MHz,  $\text{CDCl}_3$ )  $\delta$  -63.07.

HRMS calcd for  $\text{C}_{17}\text{H}_{19}\text{N}_2\text{OF}_3[\text{Na}^+]$ : 347.1347; found: 347.1344.

**(Z)-5-isopropyl-6-methyl-3-(3-nitrophenyl)-4-oxohept-2-enenitrile (3j):**

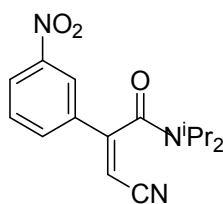

$^1\text{H}$  NMR (400 MHz,  $\text{CDCl}_3$ )  $\delta$  8.38 (s, 1H), 8.33 (dd,  $J = 8.1, 1.7$  Hz, 1H), 7.85 (d,  $J = 7.7$  Hz, 1H), 7.66 (t,  $J = 8.0$  Hz, 1H), 5.90 (s, 1H), 3.74 (dt,  $J = 13.2, 6.6$  Hz, 1H), 3.57 (dt,  $J = 13.6, 6.8$  Hz, 1H), 1.63 (d,  $J = 6.8$  Hz, 6H), 1.17 (s, 6H).

$^{13}\text{C}$  NMR (101 MHz,  $\text{CDCl}_3$ )  $\delta$  164.17, 155.80, 148.81, 134.20, 131.98, 130.60, 125.70, 121.14, 115.47, 95.35, 51.77, 46.68, 20.87, 20.13.

HRMS calcd for  $\text{C}_{16}\text{H}_{19}\text{N}_3\text{O}_3[\text{Na}^+]$ : 324.1324; found: 324.1327.

**(Z)-2-(3-acetylphenyl)-3-cyano-N,N-diisopropylacrylamide (3k):**

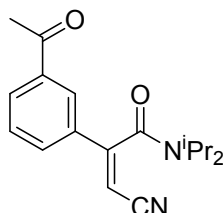

$^1\text{H}$  NMR (400 MHz,  $\text{CDCl}_3$ )  $\delta$  8.09 (s, 1H), 8.04 (d,  $J = 7.7$  Hz, 1H), 7.71 (d,  $J = 7.9$  Hz, 1H), 7.56 (t,  $J = 7.8$  Hz, 1H), 5.86 (s, 1H), 3.74 (dt,  $J = 13.2, 6.6$  Hz, 1H), 3.56 (dt,  $J = 13.6, 6.8$  Hz, 1H), 2.63 (s, 3H), 1.63 (d,  $J = 6.8$  Hz, 6H), 1.14 (s, 6H).

$^{13}\text{C}$  NMR (101 MHz,  $\text{CDCl}_3$ )  $\delta$  196.91, 164.87, 157.34, 137.93, 133.00, 130.95, 130.50, 129.76, 125.96, 115.95, 93.70, 51.60, 46.48, 26.65, 20.76, 20.14.

HRMS calcd for  $\text{C}_{18}\text{H}_{22}\text{N}_2\text{O}_2[\text{Na}^+]$ : 321.1579; found: 321.1578.

**(Z)-3-cyano-N,N-diisopropyl-2-(naphthalen-2-yl) acrylamide (3l):**

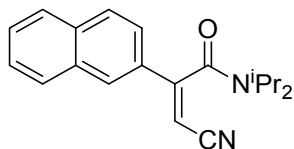

$^1\text{H}$  NMR (400 MHz,  $\text{CDCl}_3$ )  $\delta$  7.95 (s, 1H), 7.93 – 7.80 (m, 3H), 7.56 (m, 3H), 5.87 (s, 1H), 3.93 – 3.69 (m, 1H), 3.67 – 3.34 (m, 1H), 1.67 (d,  $J = 6.8$  Hz, 6H), 1.12 (s, 6H).

$^{13}\text{C}$  NMR (101 MHz,  $\text{CDCl}_3$ )  $\delta$  165.43, 158.44, 134.45, 132.98, 129.61, 129.34, 129.00, 128.09, 127.81, 127.72, 127.20, 122.09, 116.49, 92.49, 51.57, 46.44, 20.77, 20.26.

HRMS calcd for  $\text{C}_{20}\text{H}_{22}\text{N}_2\text{O}_2[\text{Na}^+]$ : 329.1630; found: 329.1628.

**(Z)-3-cyano-2-(furan-3-yl)-N,N-diisopropylacrylamide (3m):**

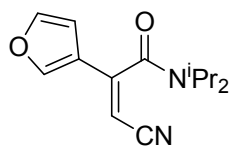

$^1\text{H}$  NMR (400 MHz,  $\text{CDCl}_3$ )  $\delta$  7.52 (d,  $J = 1.8$  Hz, 1H), 6.62 (d,  $J = 1.8$  Hz, 1H), 5.85 (s, 1H), 5.46 (s, 1H), 4.03 (s, 1H), 3.48 (s, 1H), 1.51 (d,  $J = 5.8$  Hz, 6H), 1.15 (d,  $J = 5.6$  Hz, 6H).

$^{13}\text{C}$  NMR (101 MHz,  $\text{CDCl}_3$ )  $\delta$  167.42, 147.27, 135.65, 133.32, 122.52, 116.63, 111.52, 110.90, 50.98, 46.11, 20.62, 20.37.

HRMS calcd for  $\text{C}_{14}\text{H}_{18}\text{N}_2\text{O}_2[\text{Na}^+]$ : 269.1266; found: 269.1269.

**(Z)-3-(dibenzo[b,d]furan-4-yl)-5-isopropyl-6-methyl-4-oxohept-2-enenitrile (3n):**

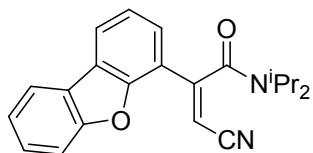

$^1\text{H}$  NMR (400 MHz,  $\text{CDCl}_3$ )  $\delta$  8.03 (dd,  $J = 7.6, 1.2$  Hz, 1H), 8.01 – 7.96 (m, 1H), 7.65 (d,  $J = 8.3$  Hz, 1H), 7.58 – 7.50 (m, 1H), 7.48 (dd,  $J = 7.8, 1.2$  Hz, 1H), 7.41 (m, 2H), 3.86 (dt,  $J = 13.2, 6.6$  Hz, 1H), 3.59 (dt,  $J = 13.7, 6.8$  Hz, 1H), 1.68 (d,  $J = 6.8$  Hz, 6H), 1.15 (s, 6H).

$^{13}\text{C}$  NMR (101 MHz,  $\text{CDCl}_3$ )  $\delta$  165.21, 155.91, 154.06, 153.80, 128.07, 127.36, 125.85, 123.73, 123.63, 123.36, 123.07, 120.89, 117.45, 116.77, 111.94, 96.67, 51.65, 46.50, 20.76, 20.22.

HRMS calcd for  $\text{C}_{22}\text{H}_{22}\text{N}_2\text{O}_2[\text{Na}^+]$ : 369.1579; found: 369.1583.

**(E)-2-(1-(methoxyimino)ethyl)cyclohex-1-enecarbonitrile (5a):**

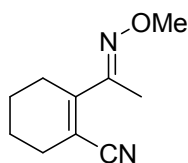

$^1\text{H}$  NMR (400 MHz,  $\text{CDCl}_3$ )  $\delta$  3.95 (s, 3H), 2.35 (dt,  $J = 6.0, 3.0$  Hz, 4H), 2.05 (s, 3H), 1.69 (s, 4H).

$^{13}\text{C}$  NMR (101 MHz,  $\text{CDCl}_3$ )  $\delta$  154.82, 150.72, 118.86, 109.79, 61.97, 28.43, 27.90, 21.14, 21.10, 13.55.

HRMS calcd for  $\text{C}_{10}\text{H}_{14}\text{N}_2\text{O}[\text{Na}^+]$ : 201.1004; found: 201.0999.

**(Z)-3-(pyridin-2-yl)but-2-enenitrile, 5b**

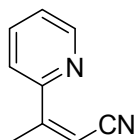

$^1\text{H NMR}$  (400 MHz,  $\text{CDCl}_3$ )  $\delta$  8.71 (d,  $J = 4.4$  Hz, 1H), 7.78 (m, 2H), 7.34 (d,  $J = 4.9$  Hz, 1H), 5.58 (s, 1H), 2.38 (s, 3H).

$^{13}\text{C NMR}$  (101 MHz,  $\text{CDCl}_3$ )  $\delta$  159.40 (s), 154.86 (s), 149.51 (s), 136.74 (s), 124.33 (s), 122.55 (s), 117.33 (s), 97.08 (s), 22.92 (s).

HRMS calcd for  $\text{C}_9\text{H}_8\text{N}_2$  [ $\text{Na}^+$ ]: 167.0585; found: 167.0581.

### 2-(pyridin-2-yl)cyclopent-1-enecarbonitrile, 5c

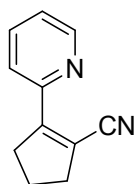

$^1\text{H NMR}$  (400 MHz,  $\text{CDCl}_3$ )  $\delta$  8.62 (d,  $J = 4.3$  Hz, 1H), 7.78 (d,  $J = 7.9$  Hz, 1H), 7.68 (m, 1H), 7.21 (m, 1H), 3.06 – 2.94 (m, 2H), 2.87 – 2.74 (m, 2H), 2.10 – 1.96 (m, 2H).

$^{13}\text{C NMR}$  (101 MHz,  $\text{CDCl}_3$ )  $\delta$  157.86 (s), 151.82 (s), 149.60 (s), 136.57 (s), 123.92 (s), 122.21 (s), 117.62 (s), 109.90 (s), 36.75 (s), 35.19 (s), 22.35 (s).

HRMS calcd for  $\text{C}_{11}\text{H}_{10}\text{N}_2$  [ $\text{Na}^+$ ]: 193.0742; found: 193.0739.

### (3S,8R,9S,10R,13S,14S)-16-cyano-17-((E)-1-(methoxyimino)ethyl)-10,13-dimethyl-2,3,4,7,8,9,10,11,12,13,14,15-dodecahydro-1H-cyclopenta[a]phenanthren-3-yl acetate (5d):

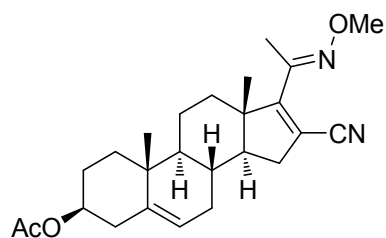

$^1\text{H NMR}$  (400 MHz,  $\text{CDCl}_3$ )  $\delta$  5.39 (d,  $J = 4.5$  Hz, 1H), 4.60 (m, 1H), 3.96 (s, 3H), 2.49 (dd,  $J = 15.4$ , 6.6 Hz, 1H), 2.41 – 2.26 (m, 4H), 2.19 (s, 3H), 2.04 (s, 3H), 1.99 (s, 1H), 1.93 – 1.78 (m, 2H), 1.62 (m, 6H), 1.39 (m, 1H), 1.22 – 1.08 (m, 2H), 1.05 (s, 6H).

$^{13}\text{C NMR}$  (101 MHz,  $\text{CDCl}_3$ )  $\delta$  170.51, 165.00 (2C), 150.80, 140.12, 121.76, 110.98, 73.71, 62.36, 55.67, 49.83, 49.49, 38.04, 36.81, 36.66, 35.68, 34.93, 31.22, 30.18, 27.68, 21.42, 20.67, 19.19, 15.98, 13.29.

HRMS calcd for  $\text{C}_{25}\text{H}_{34}\text{N}_2\text{O}_3$  [ $\text{Na}^+$ ]: 433.2467; found: 433.2461.

sw140410-5

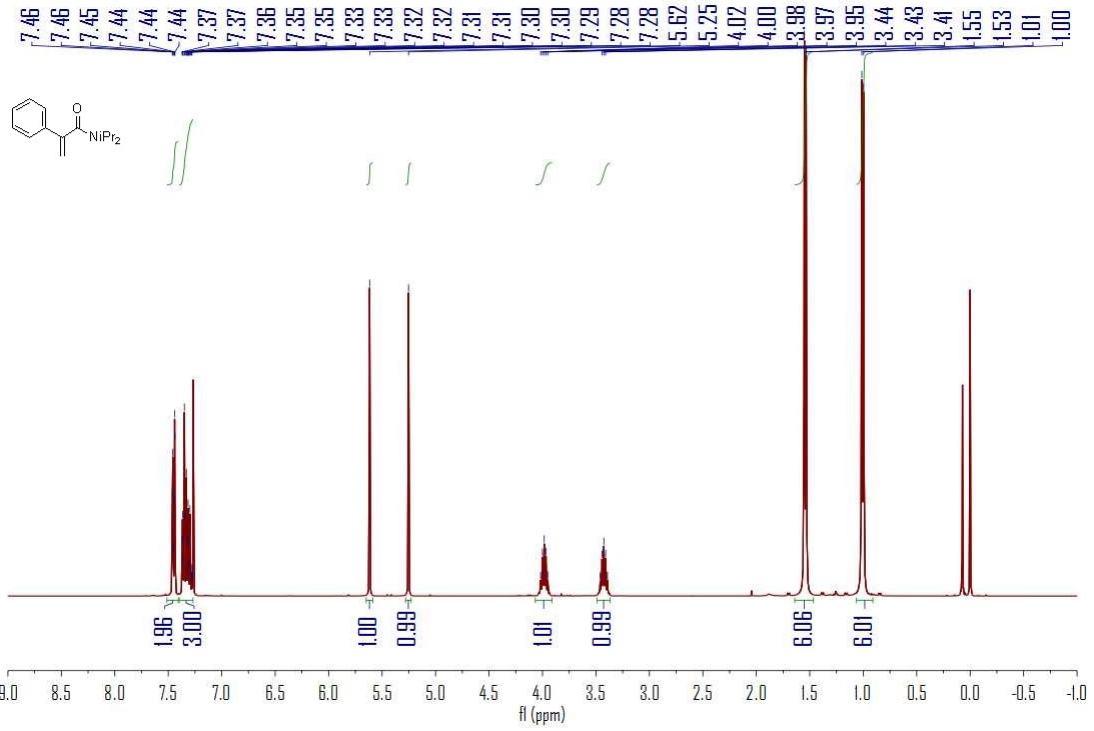

sw140410-5

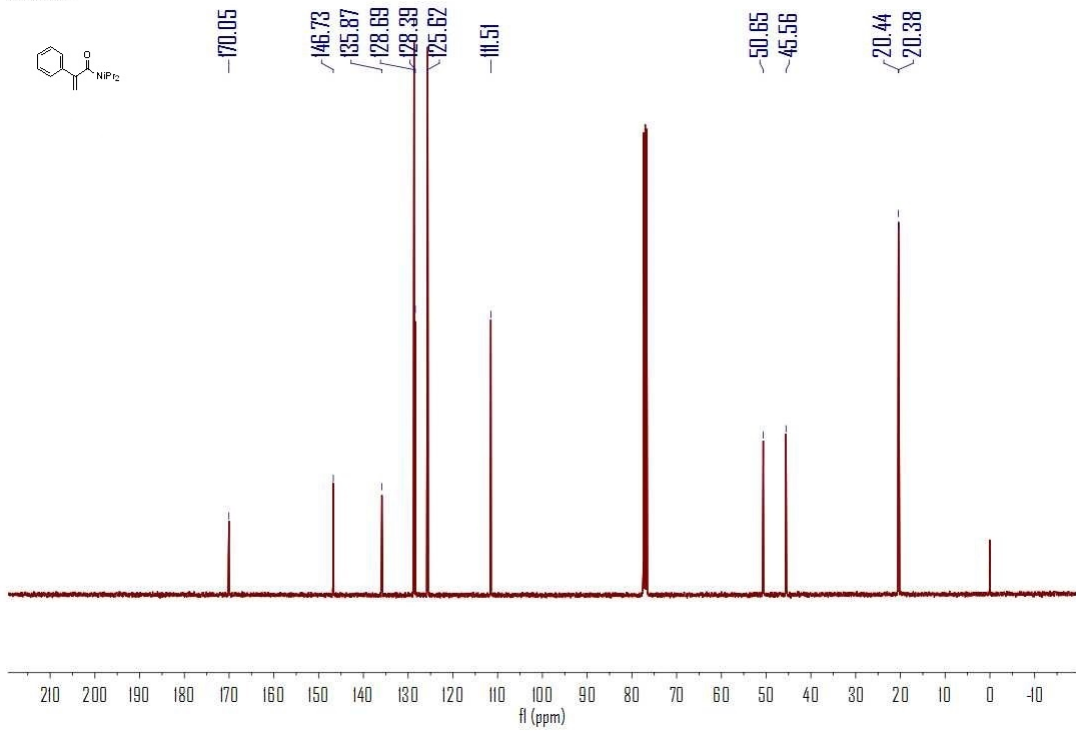

sw140408-1

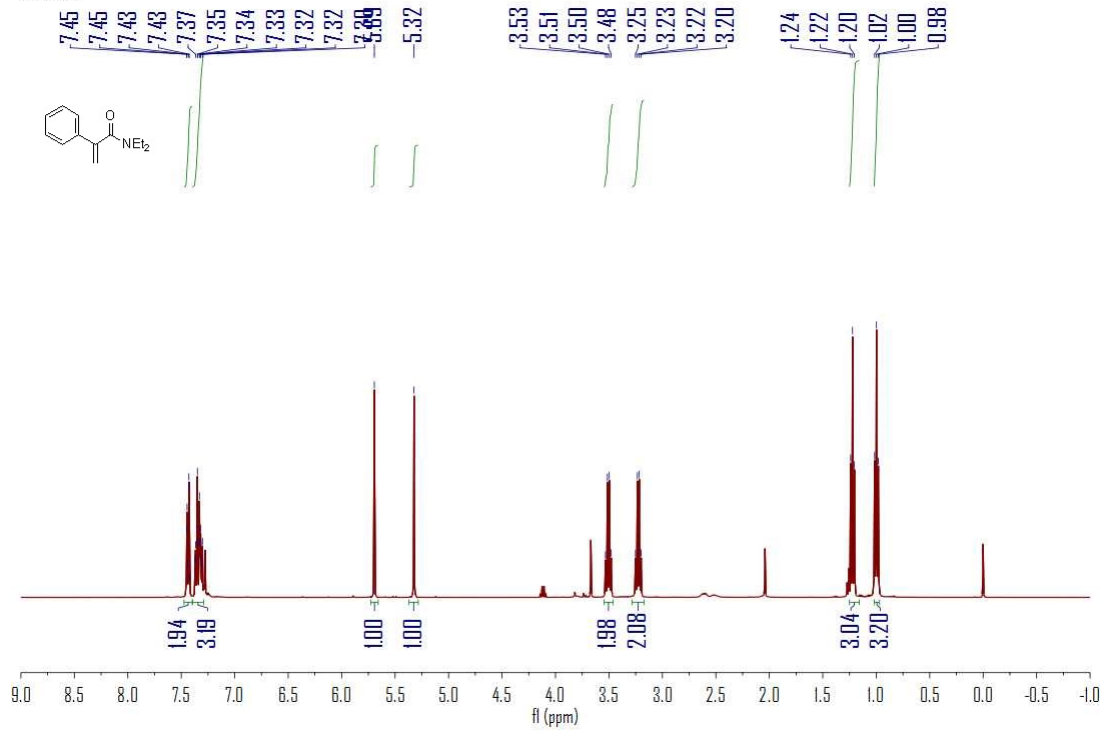

sw140408-1

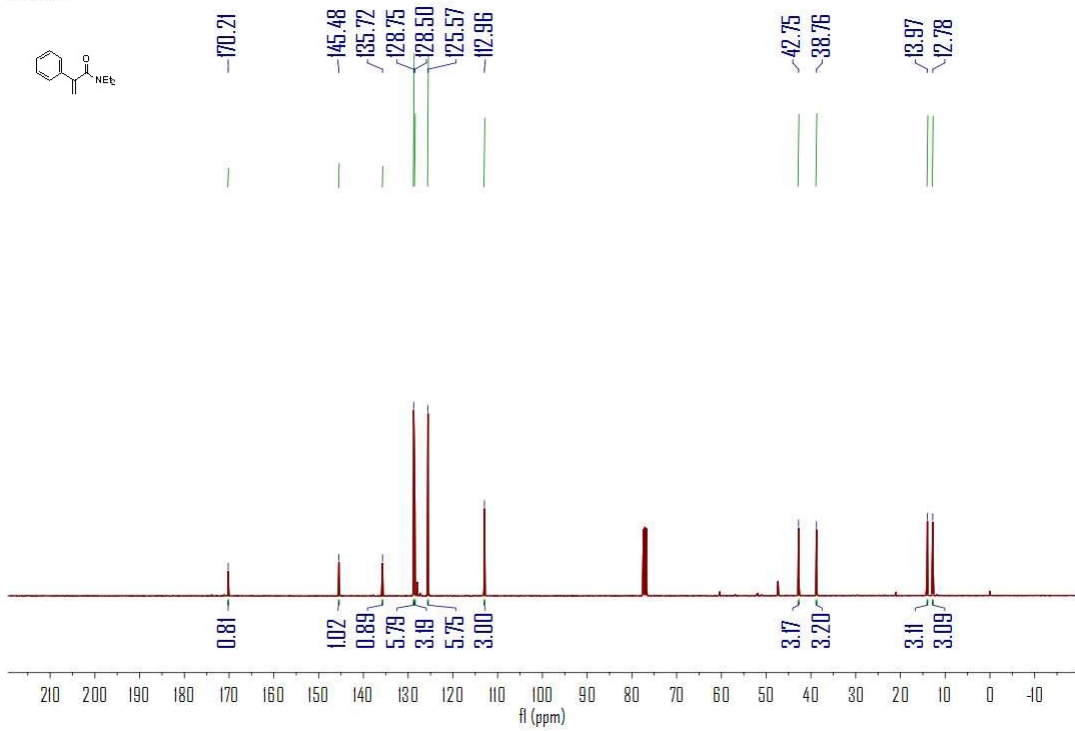



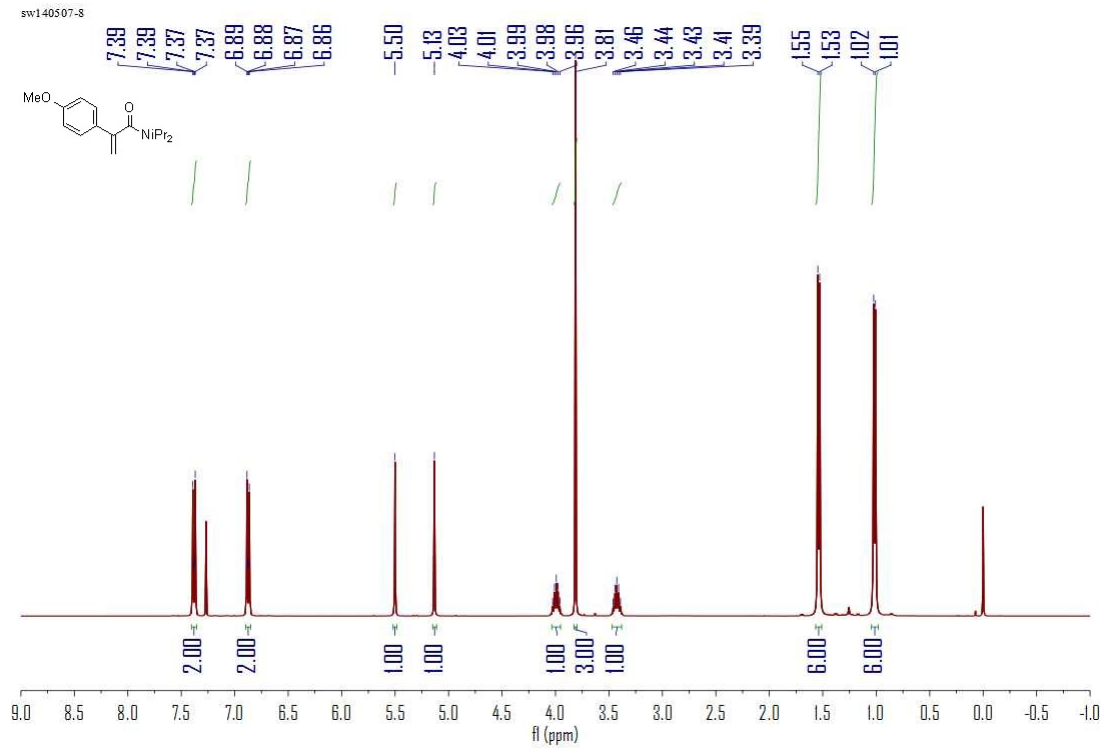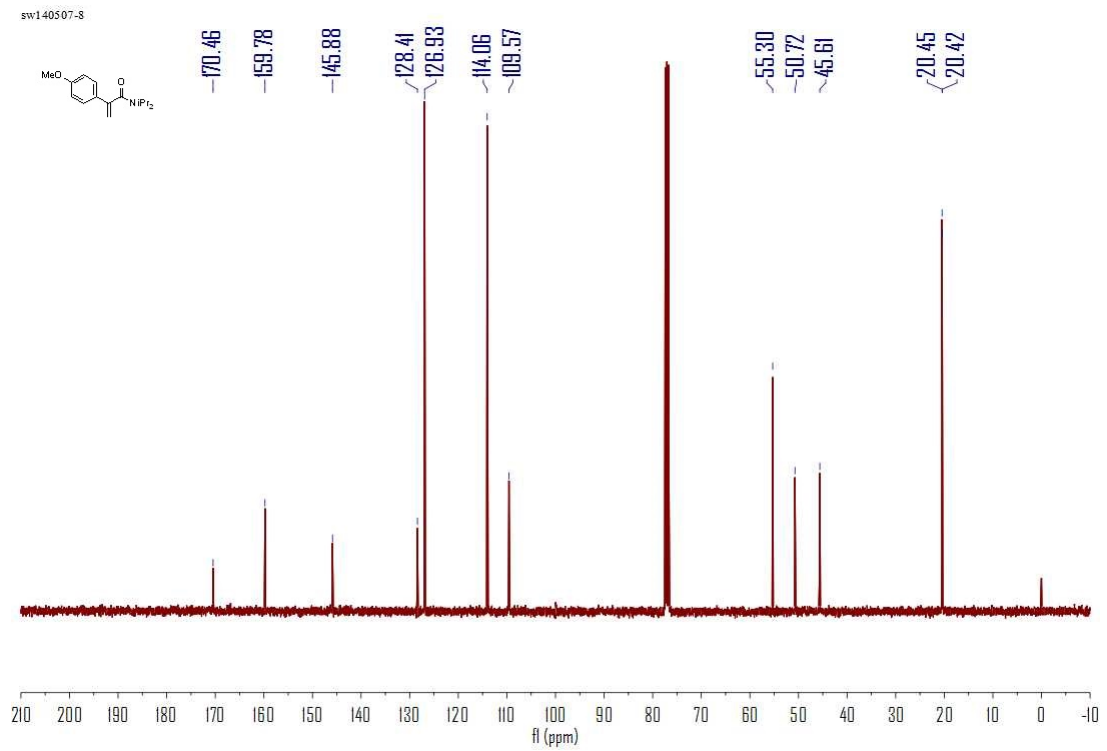

sw140418-1

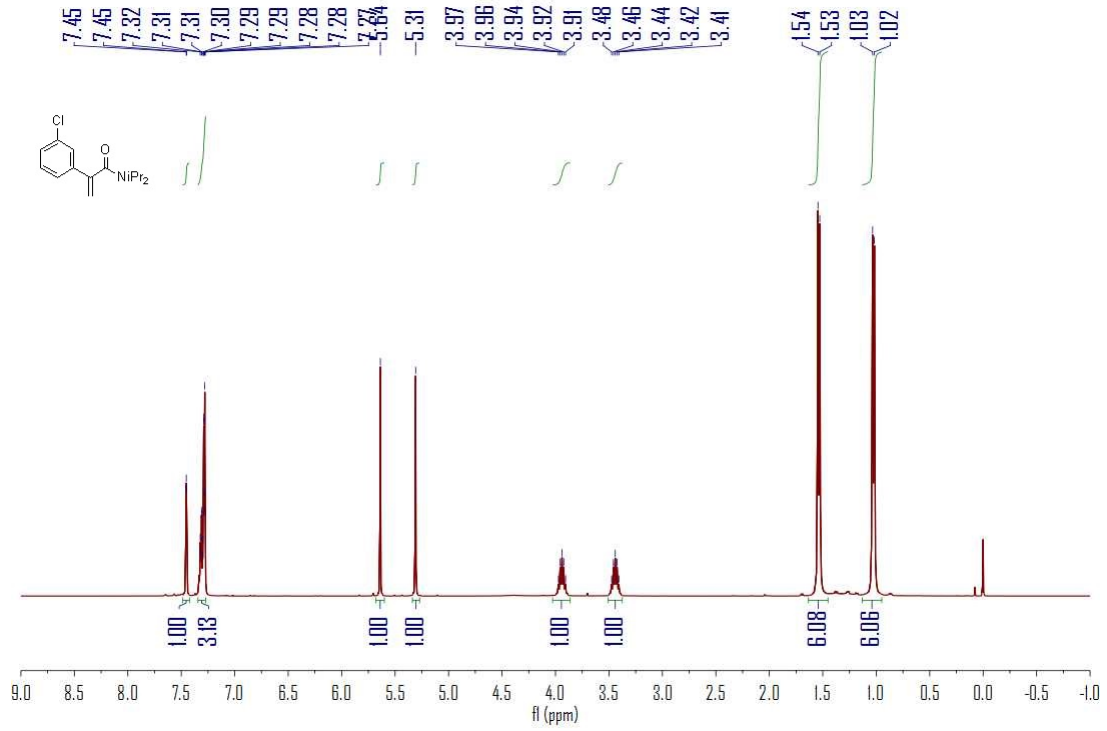

sw140418-1

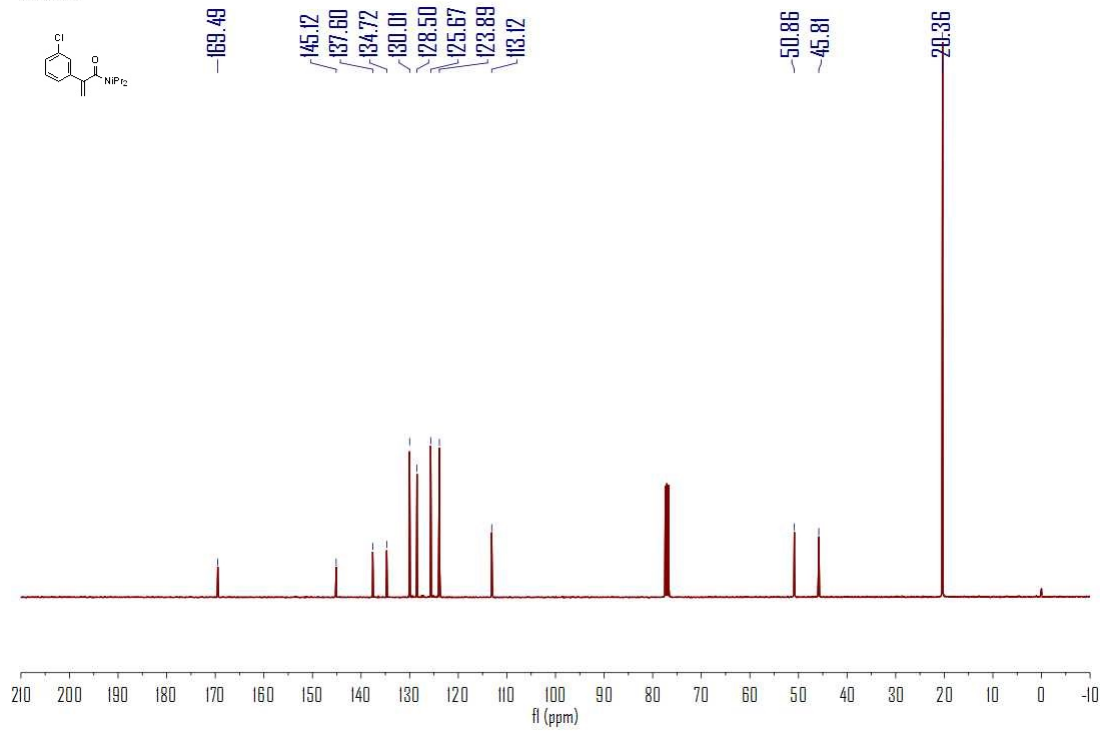

sw140418-3

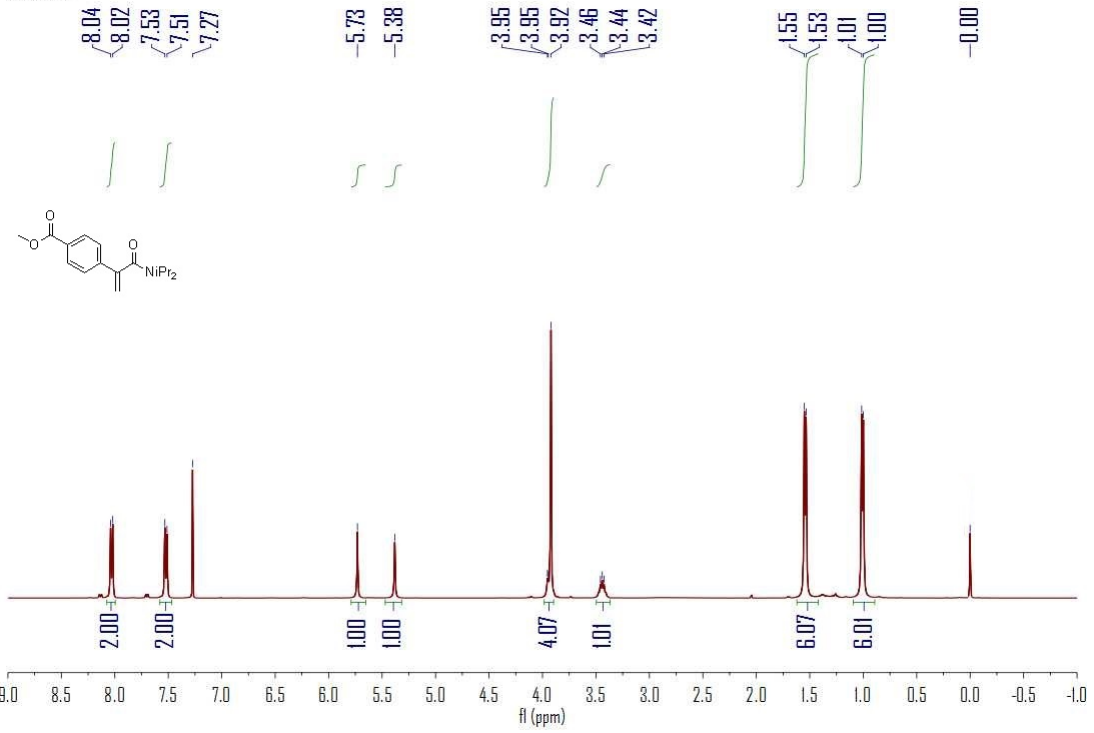

sw140418-3

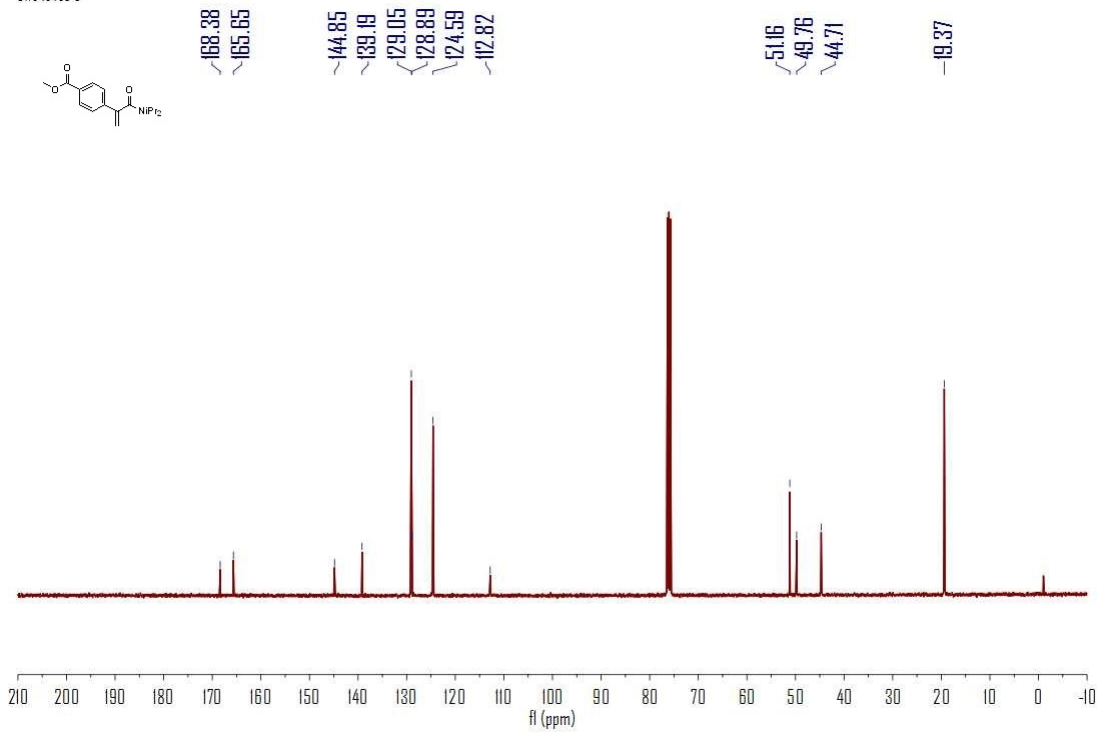

sw140516-s

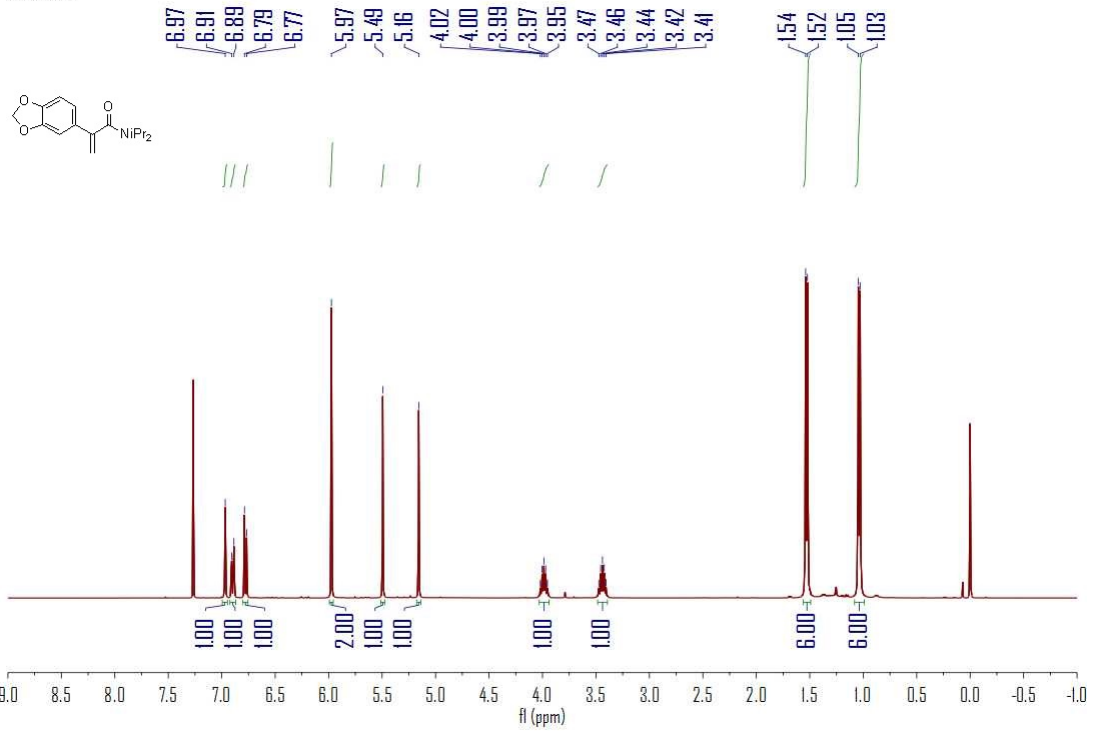

sw140516-s

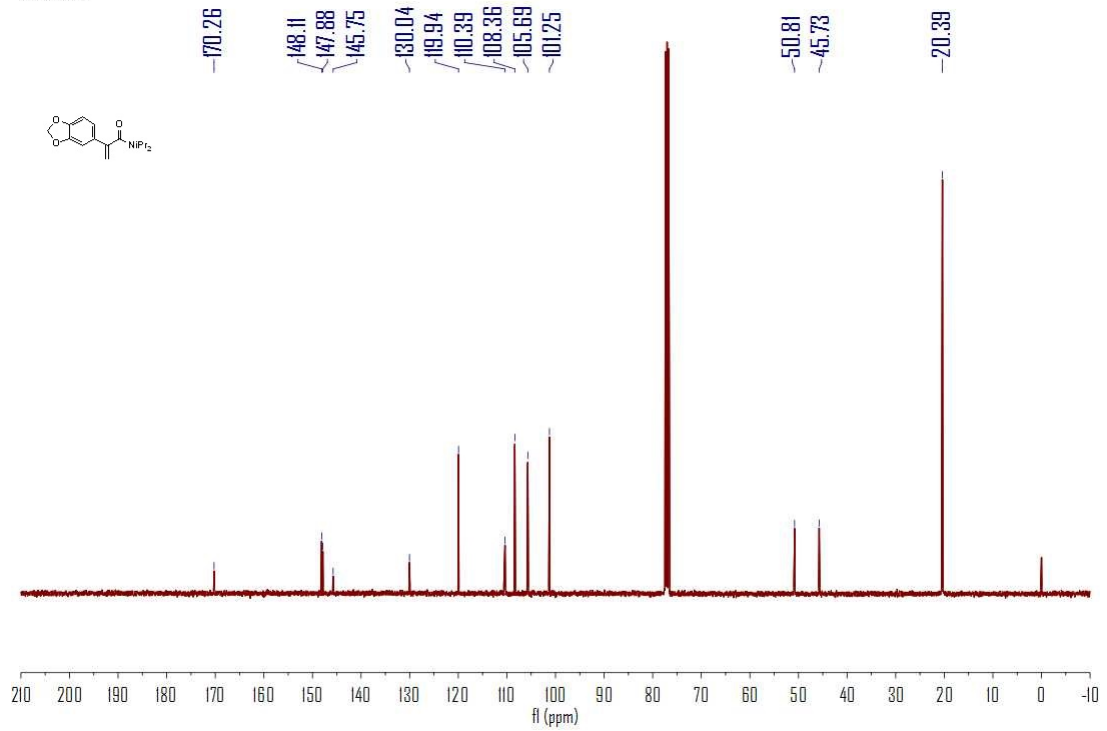

sw140516-5

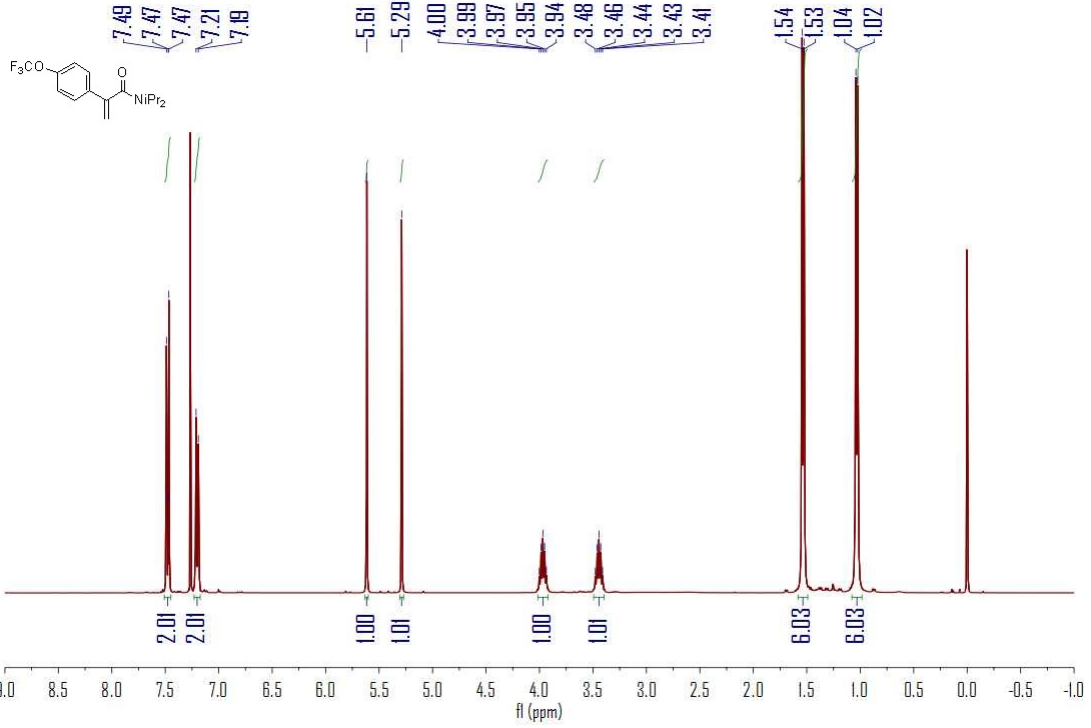

sw140516-5

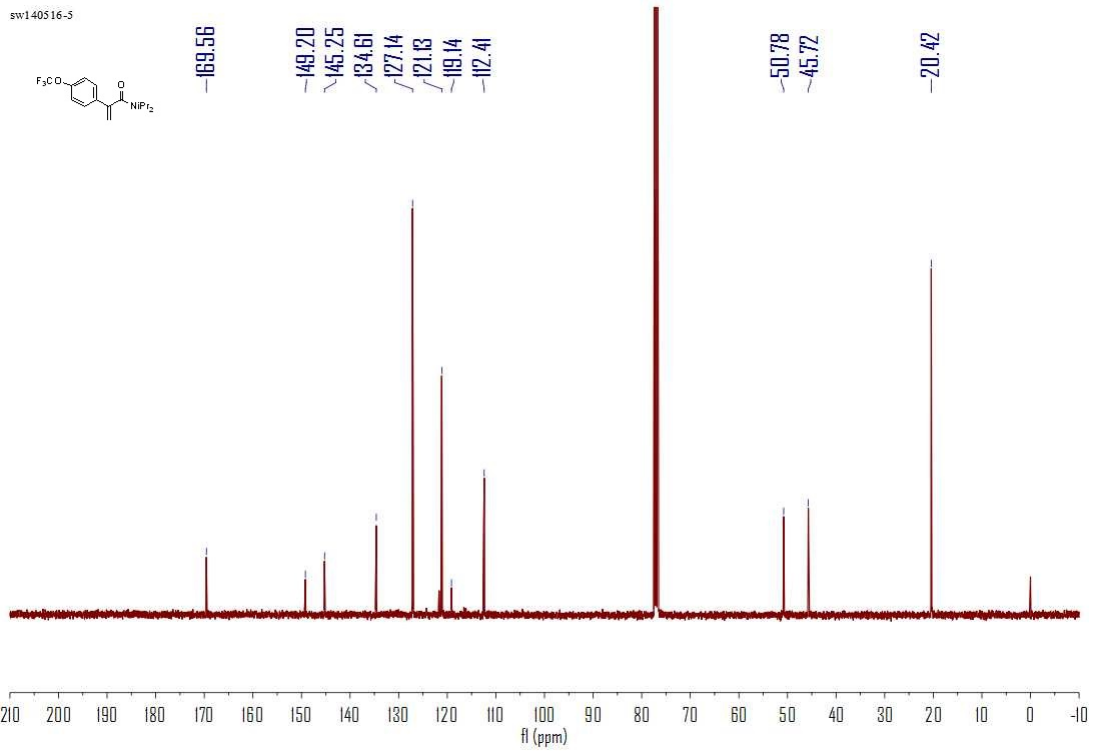

sw140614-2

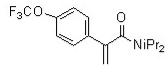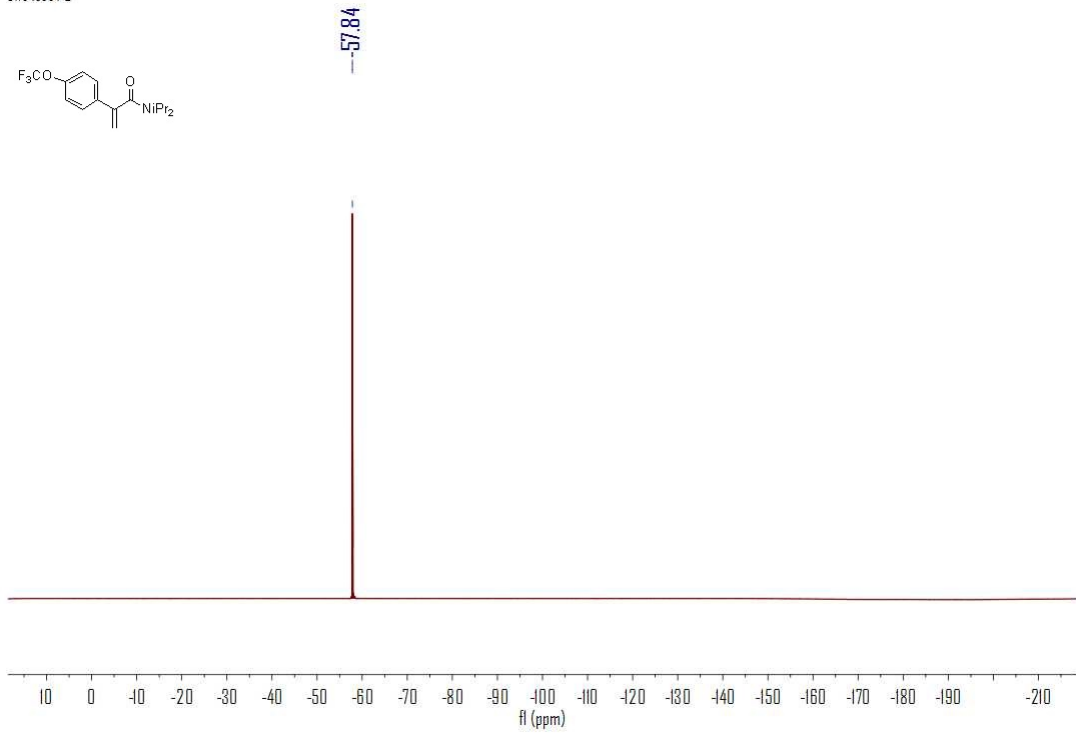

sw140507-6

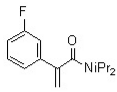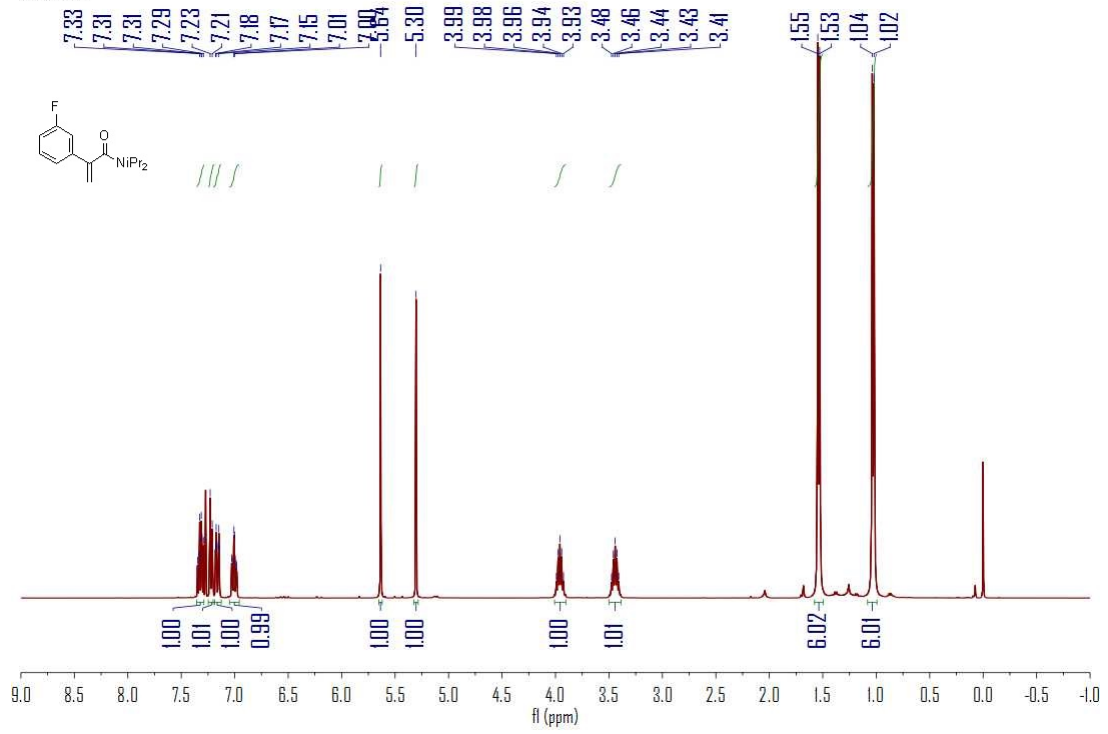

sw140507-6

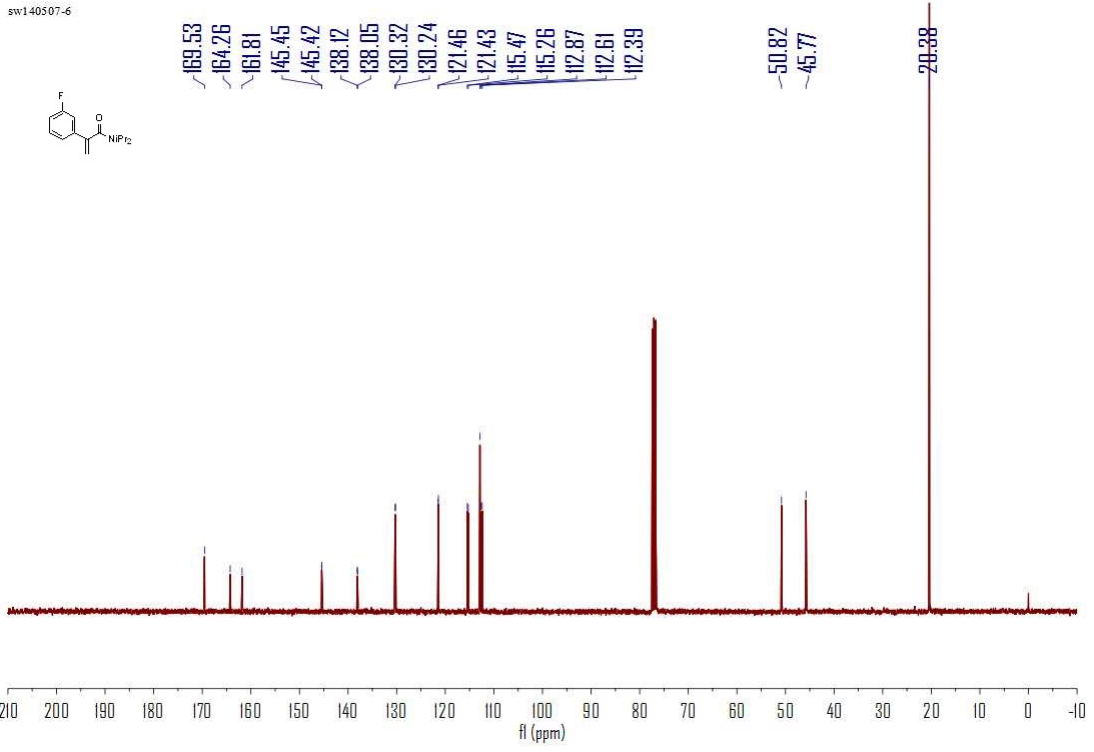

sw140614-1

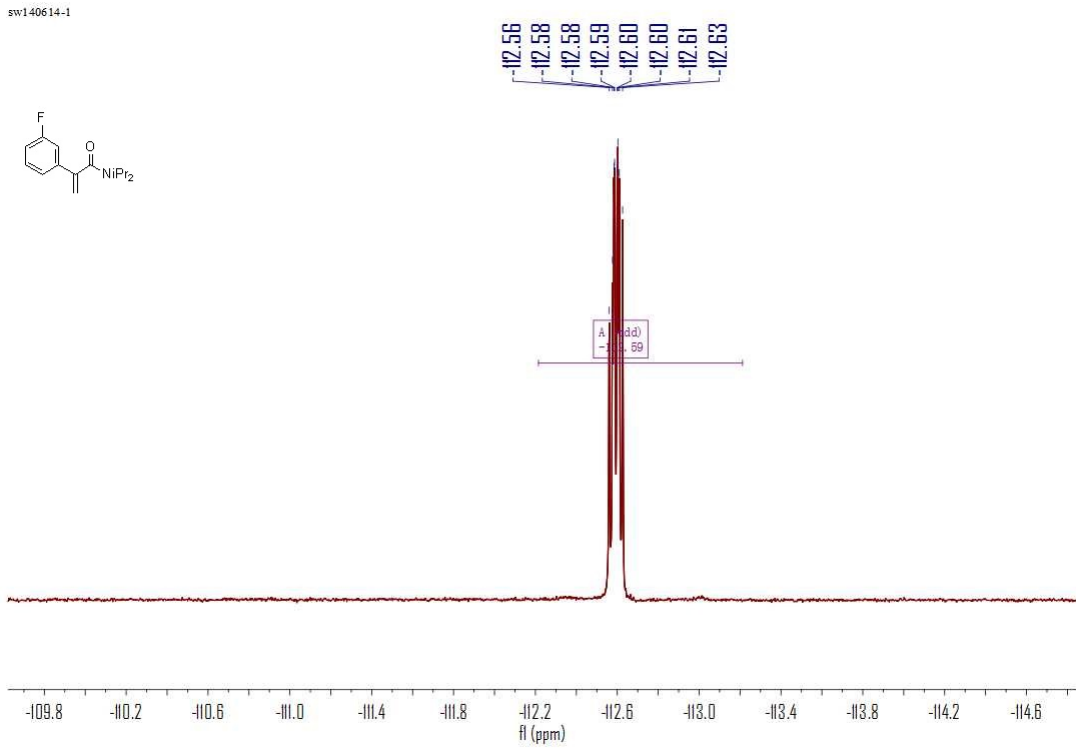

sw140504-6

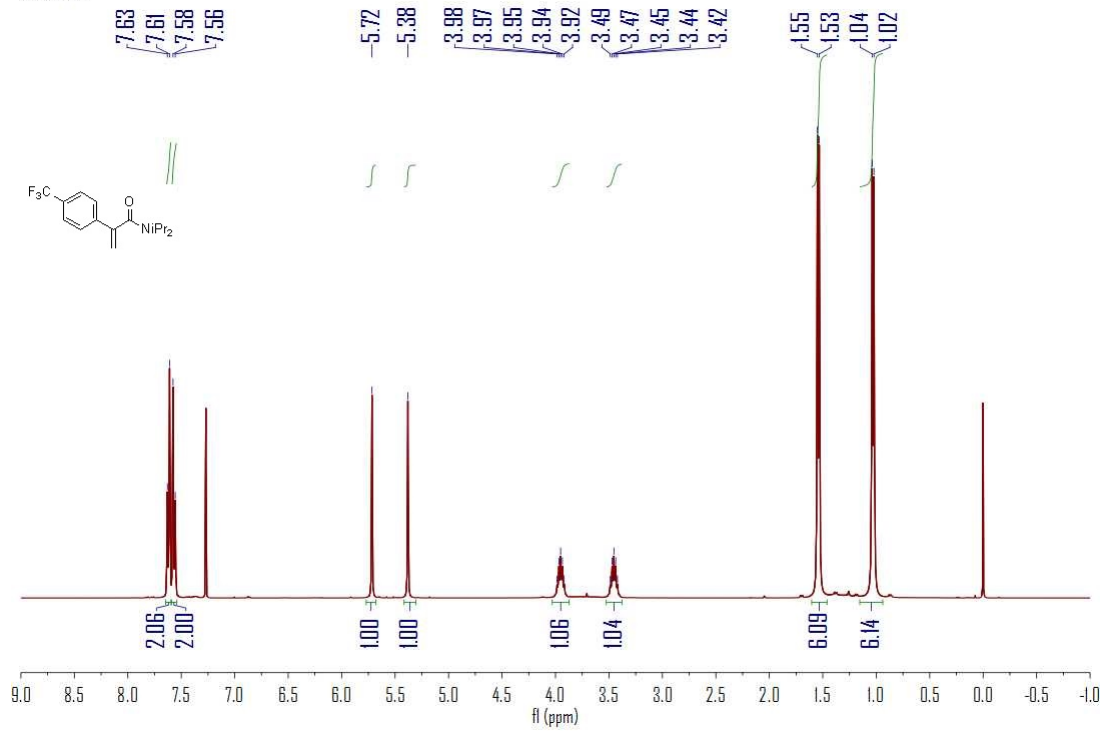

sw140504-6

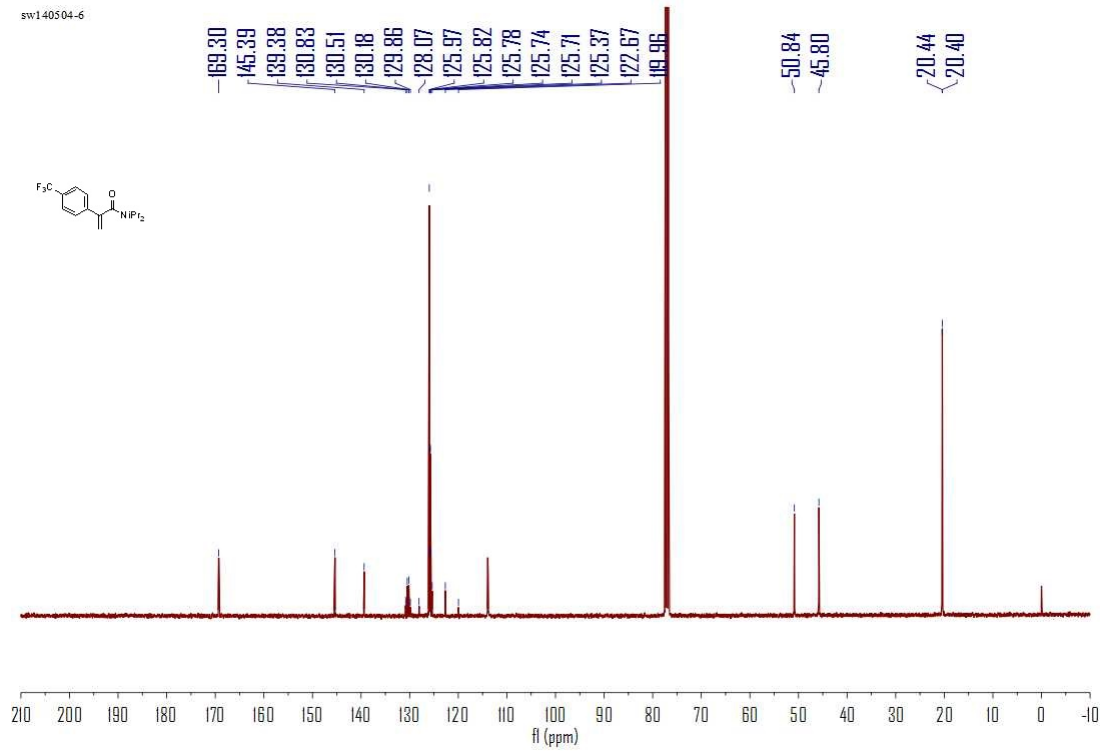



sw140504-6

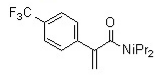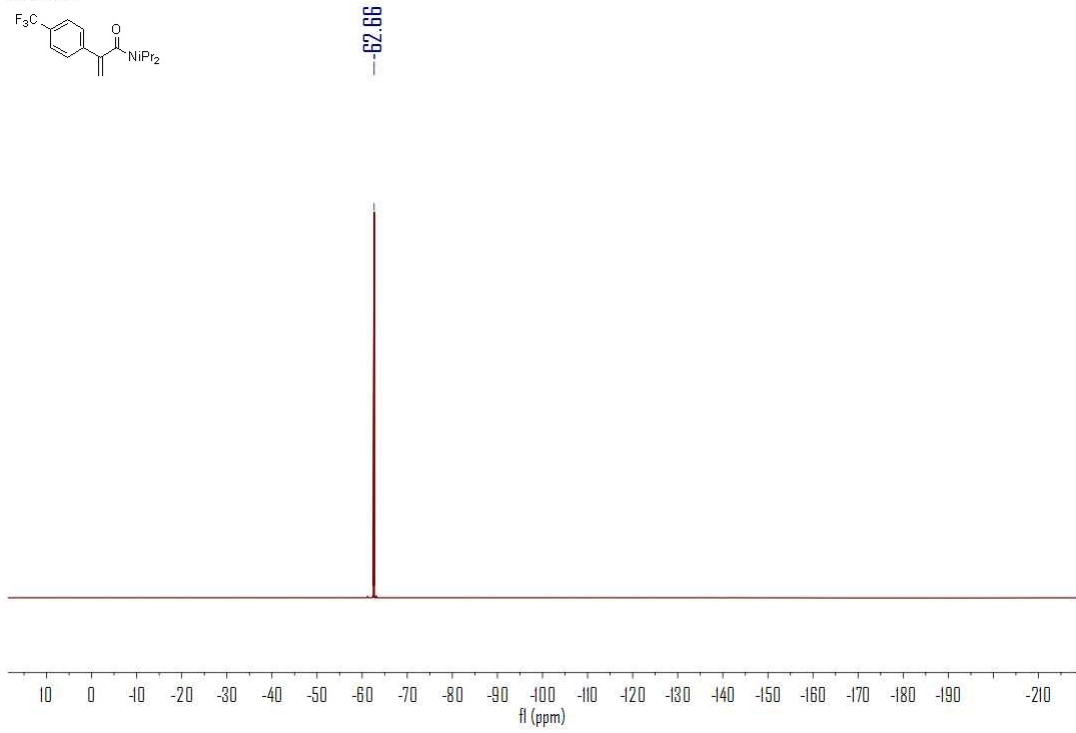

sw140507-7

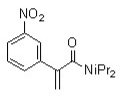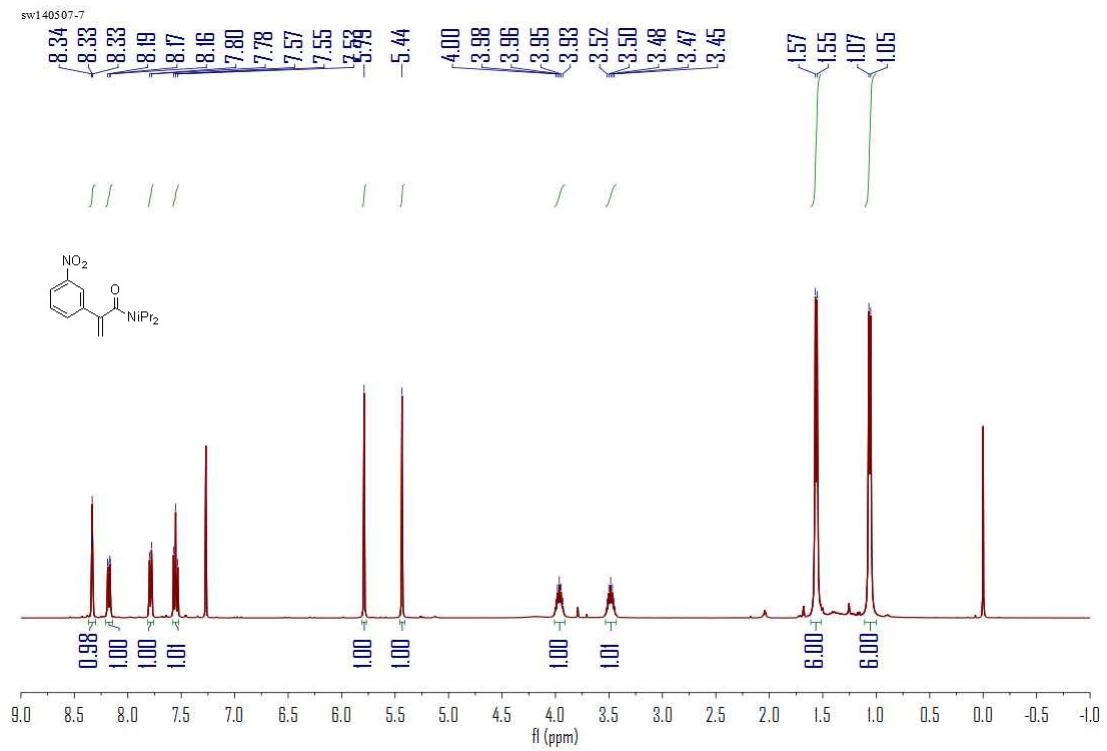



sw140504-5

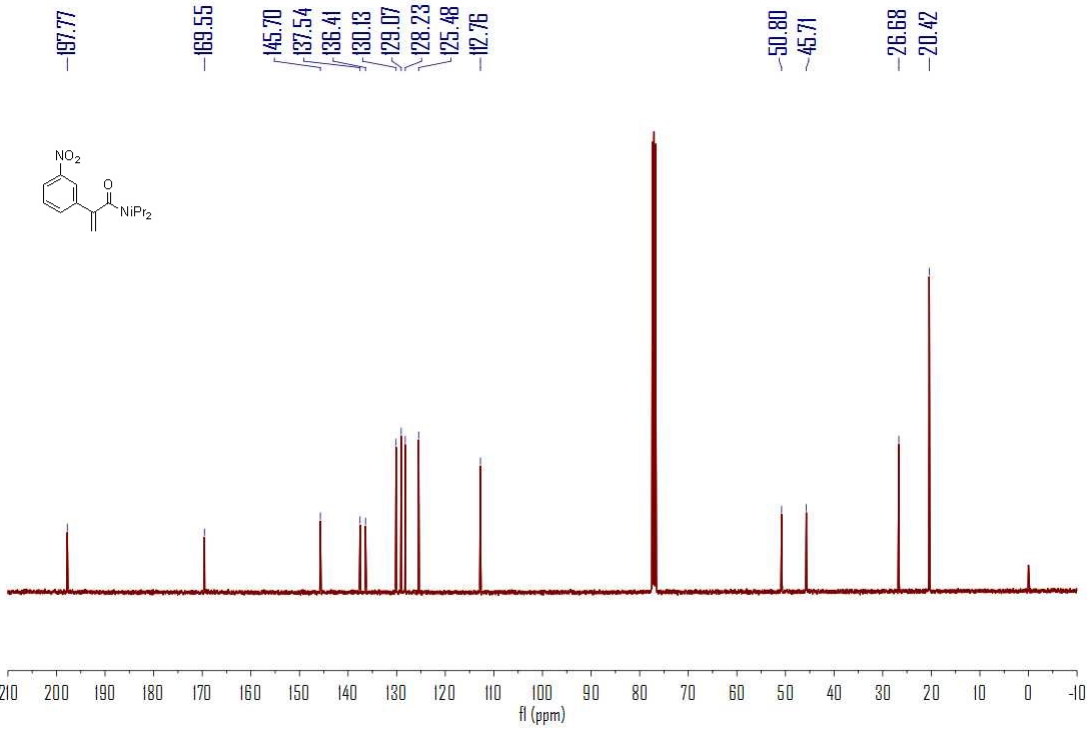

sw140516-6

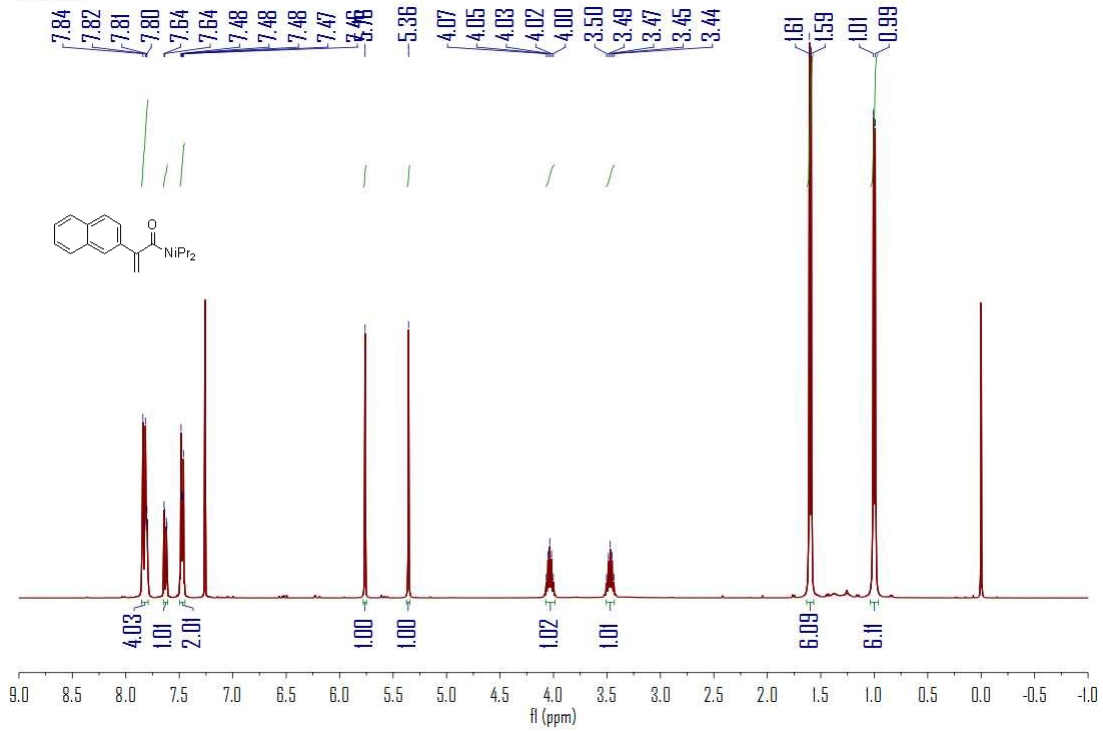



sw140507-10

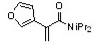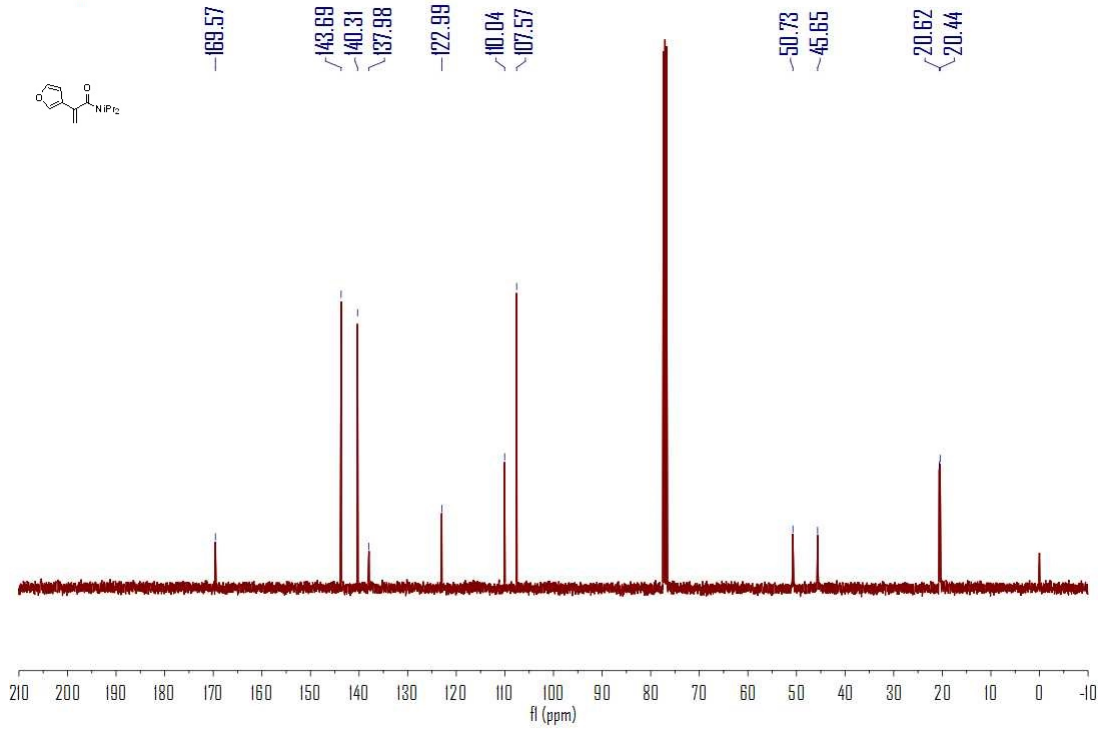

sw140504-7

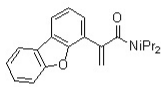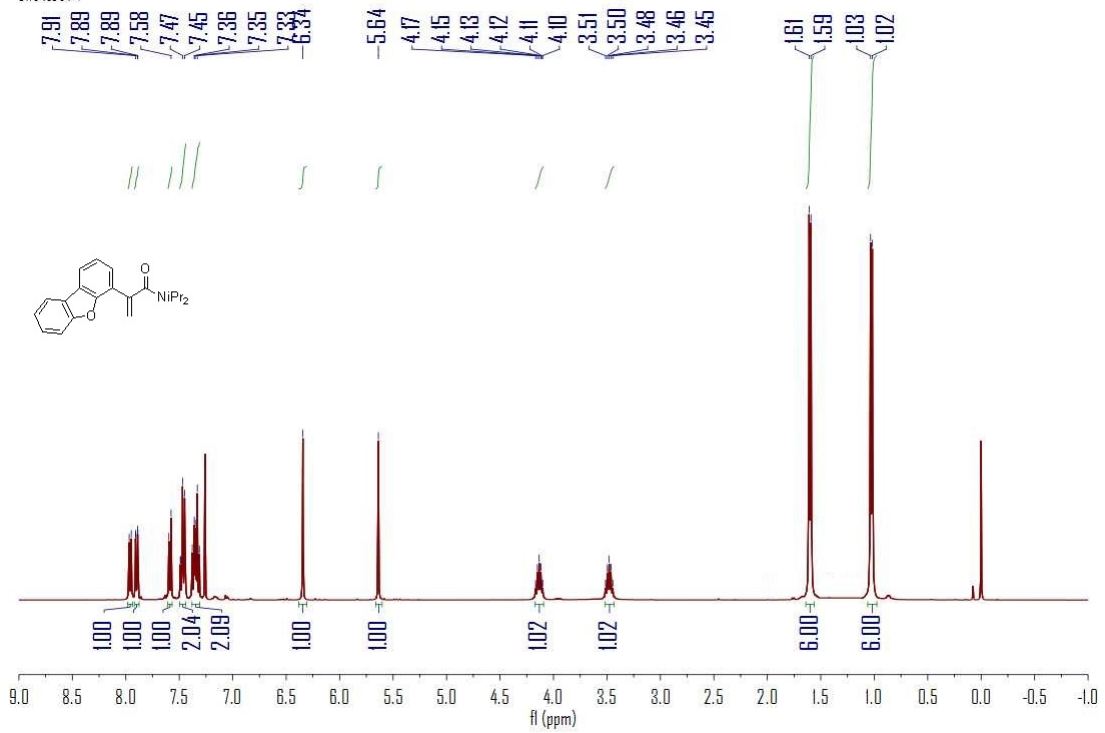

sw140504-7

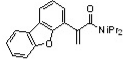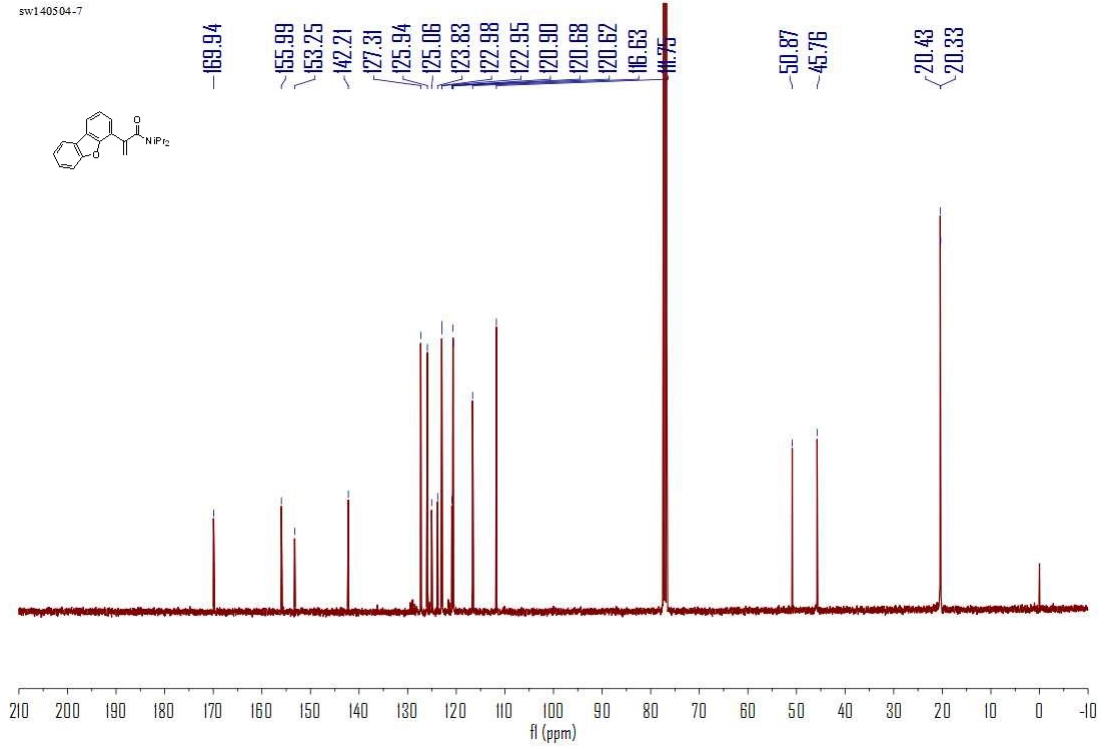

sw140410-6

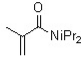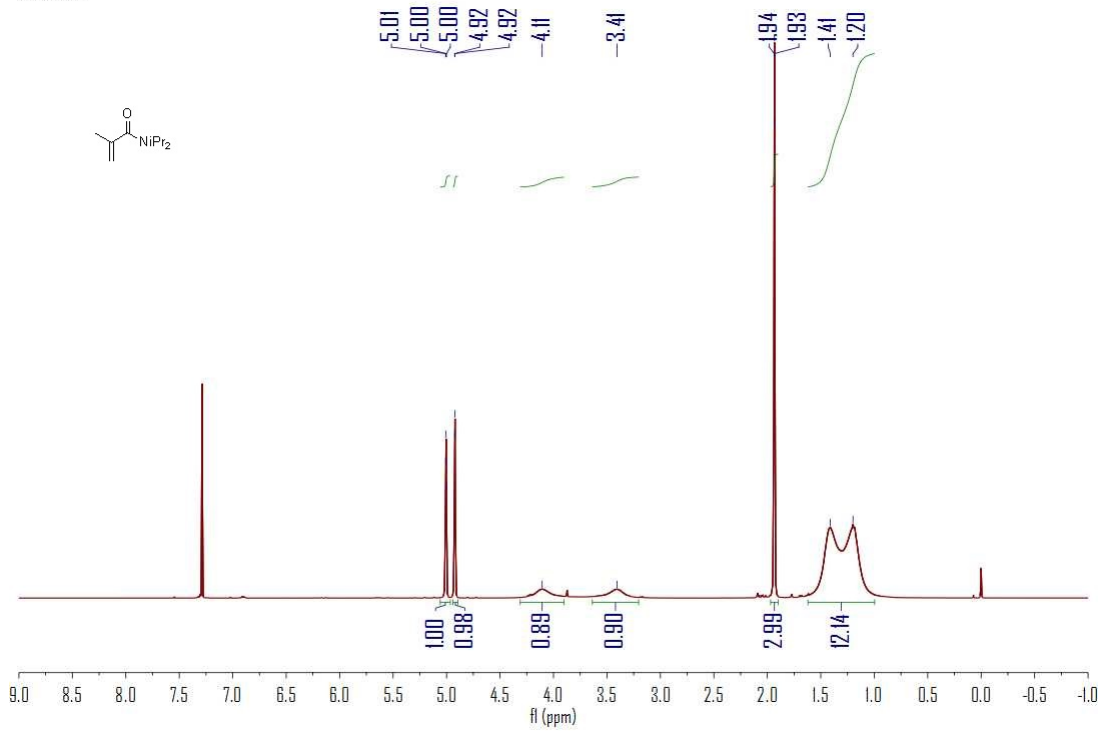

sw140410-6

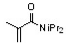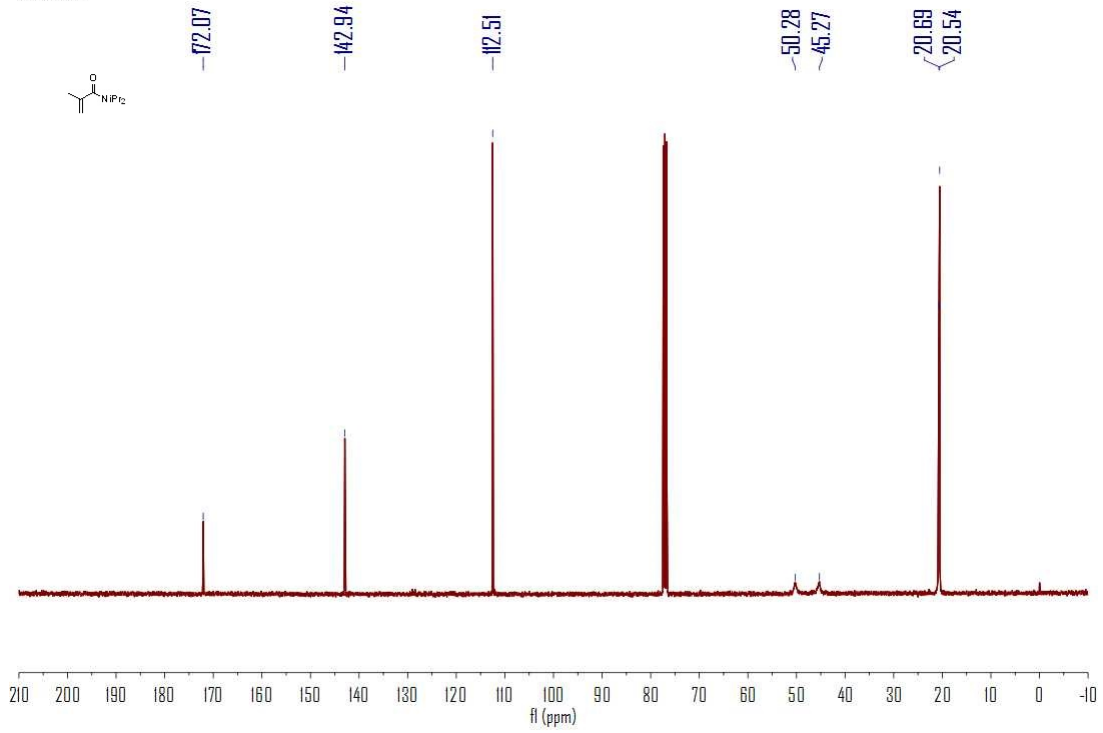

sw140524-2

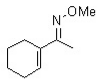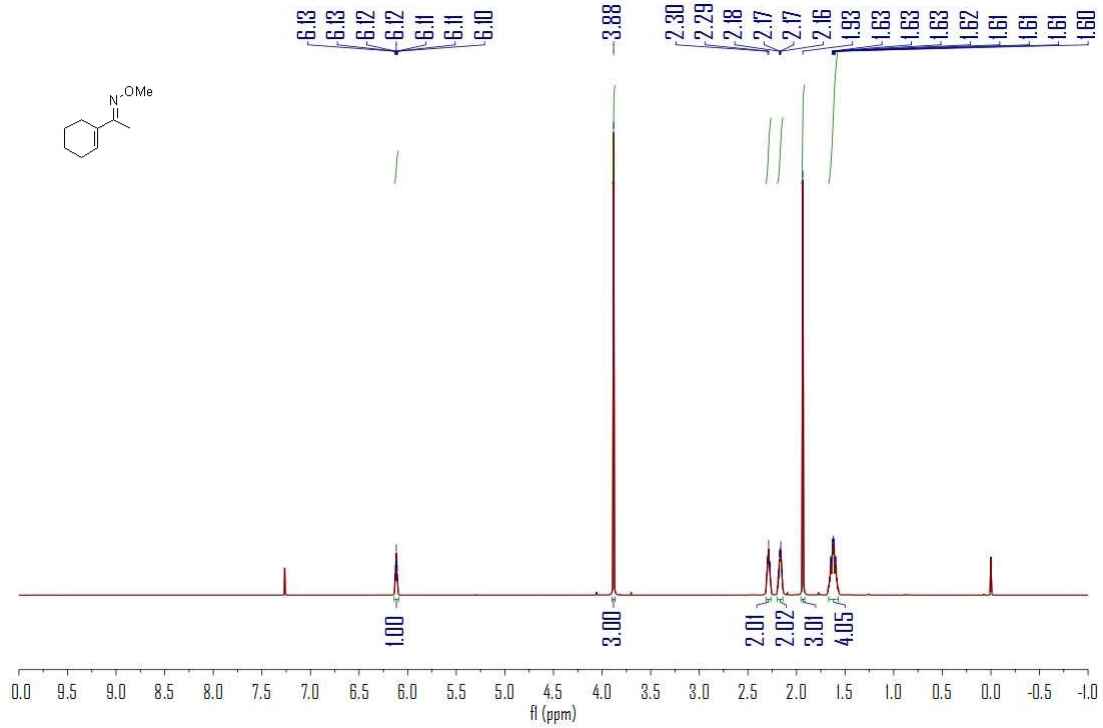

sw140524-2

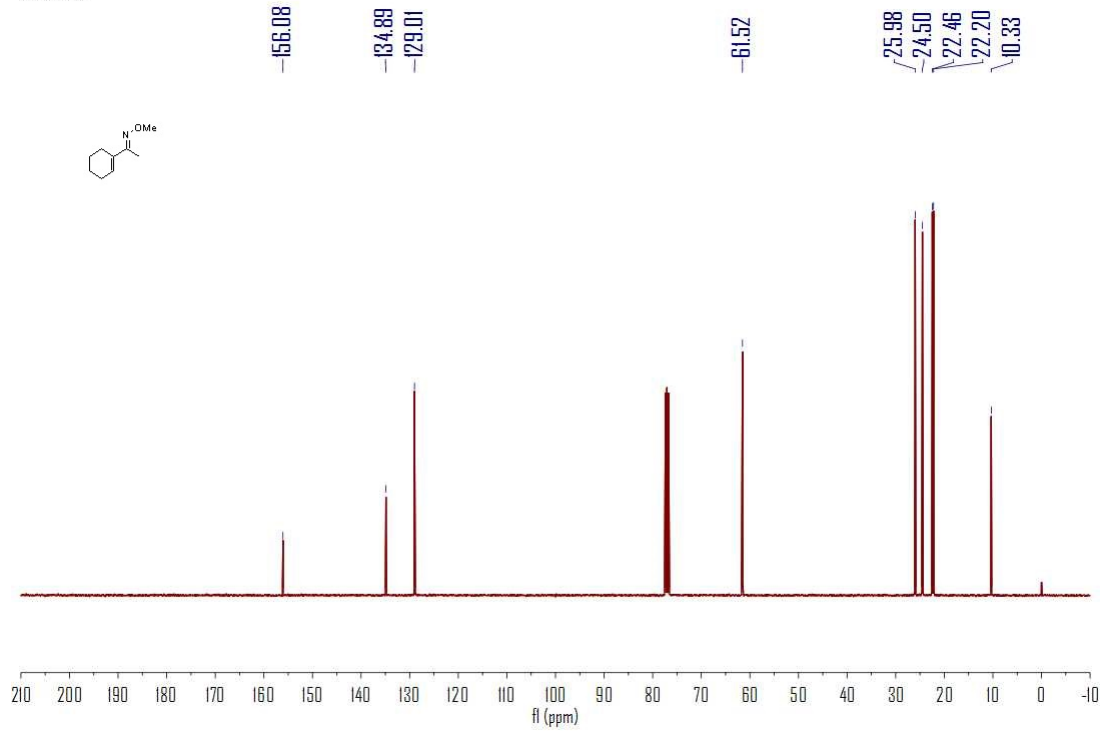

sw140404-3

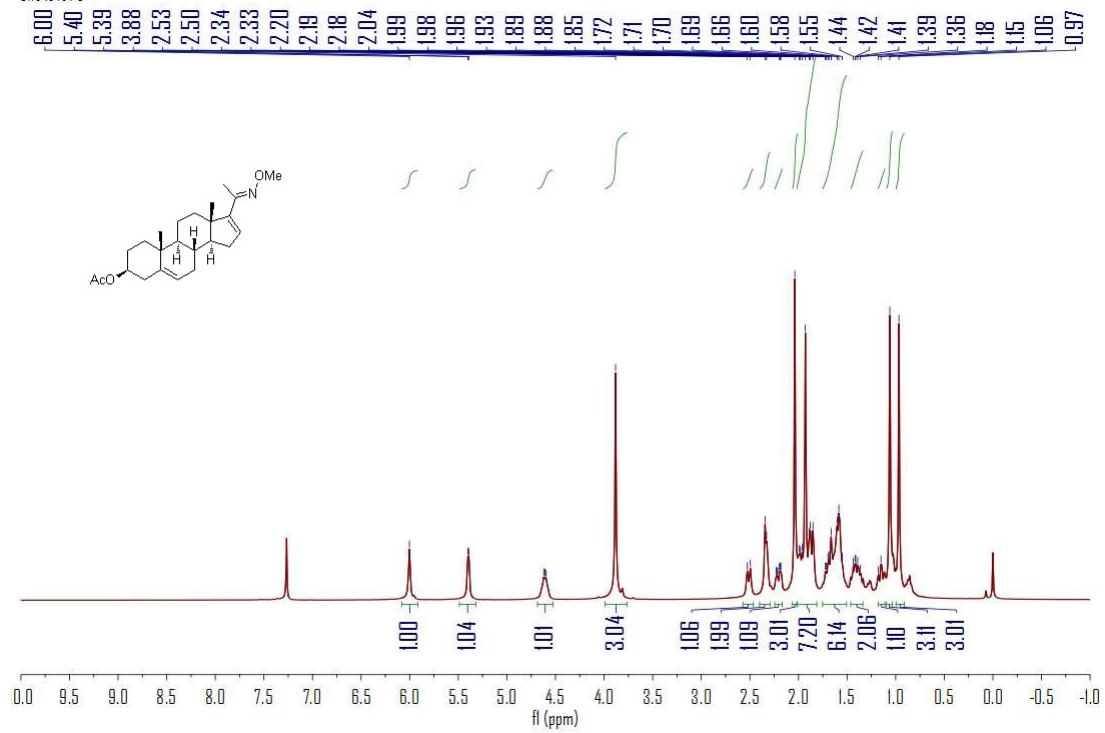



sw140404-3

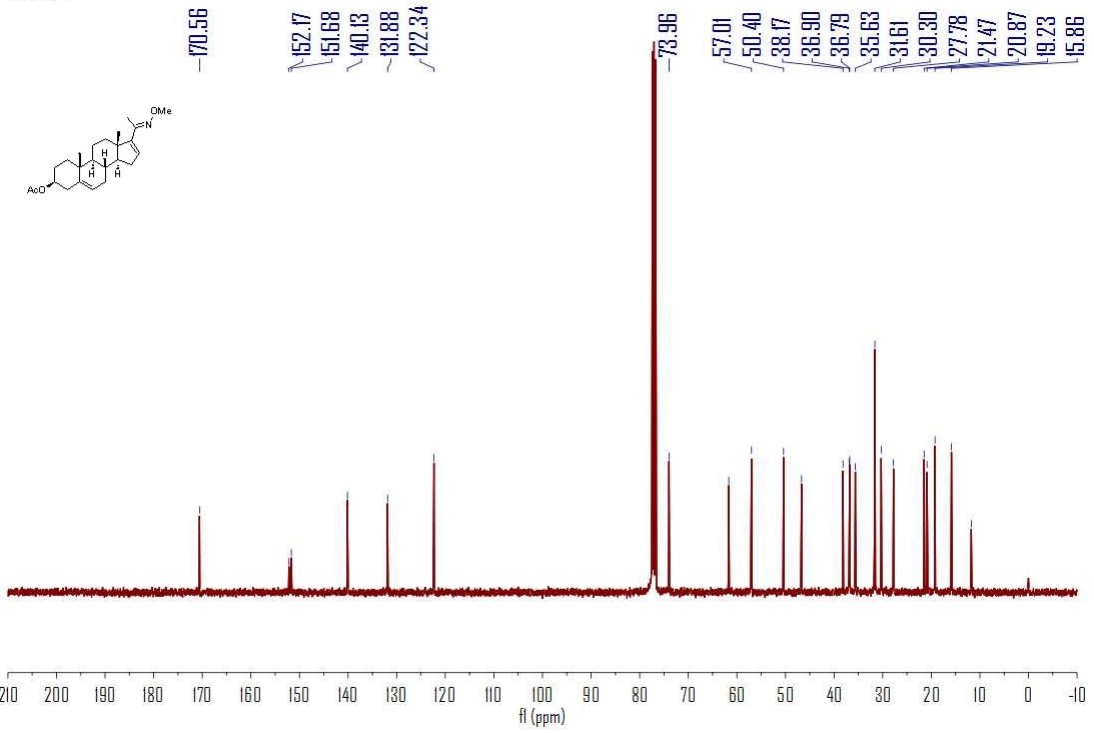

sw140115-2

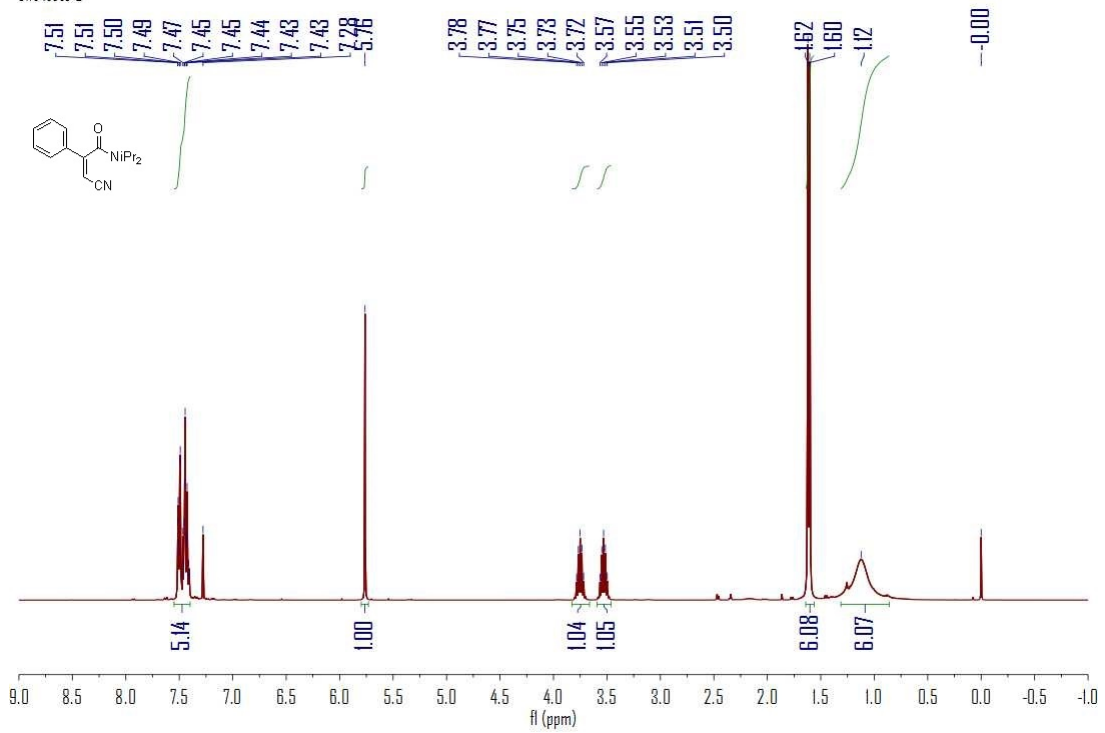

sw140415-2

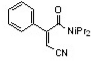

165.31  
158.51  
132.32  
131.43  
129.32  
126.30  
116.37  
82.32  
51.45  
46.31  
20.67  
20.17

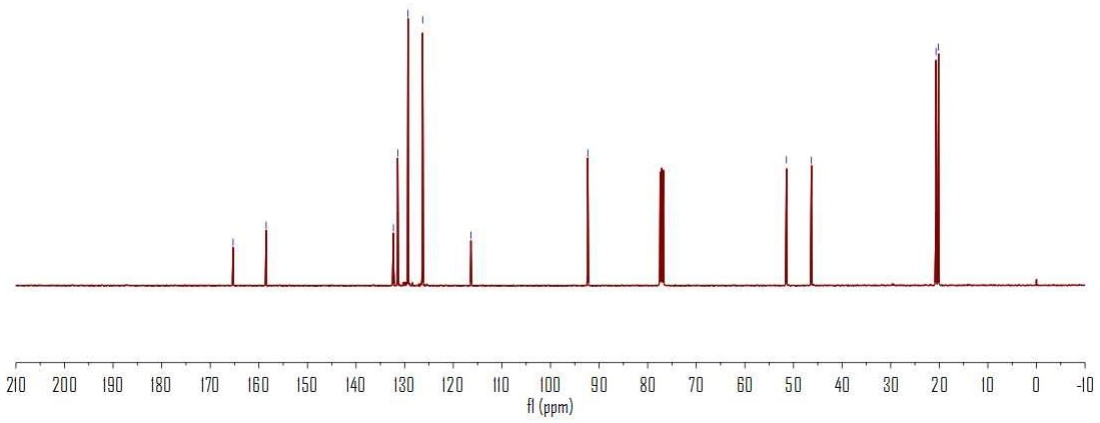

sw140410-4

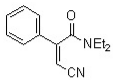

7.50  
7.49  
7.49  
7.48  
7.47  
7.46  
7.46  
7.45  
7.43  
7.43  
3.63  
3.61  
3.59  
3.58  
3.28  
3.27  
3.25  
3.23  
1.32  
1.30  
1.28  
1.11  
1.10  
1.08

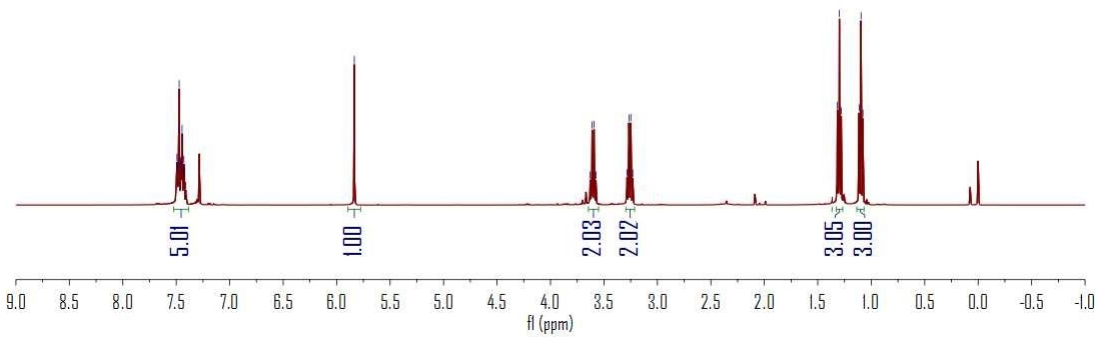

sw140410-4

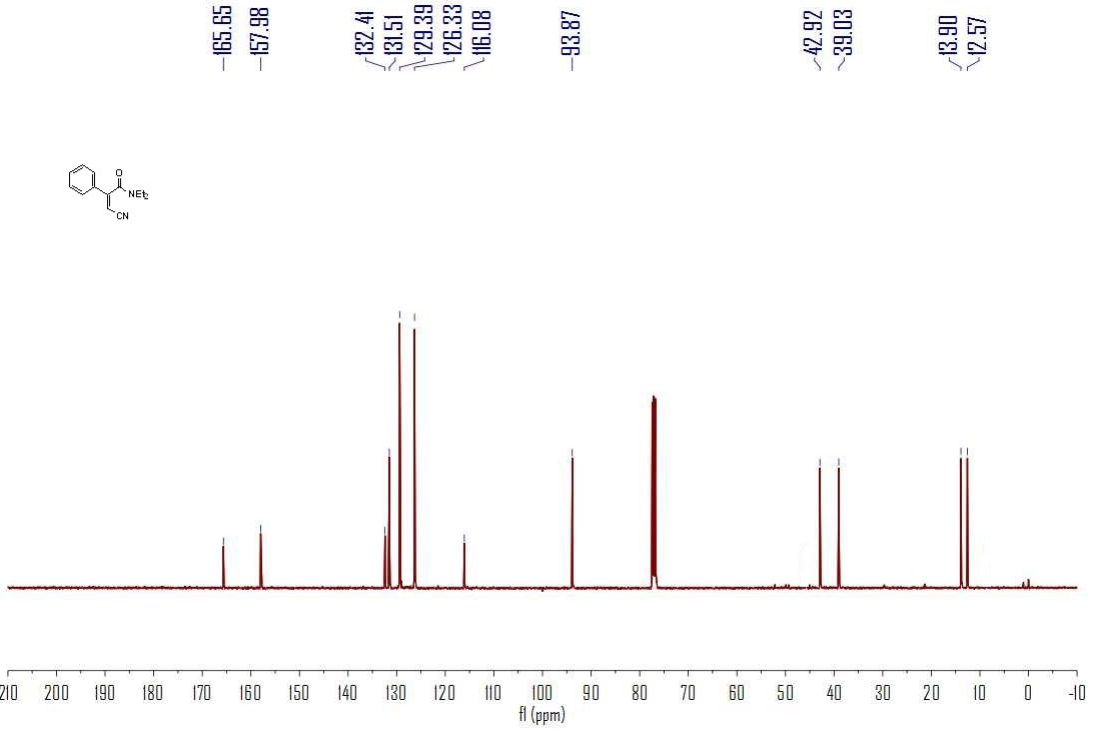

sw140425-2

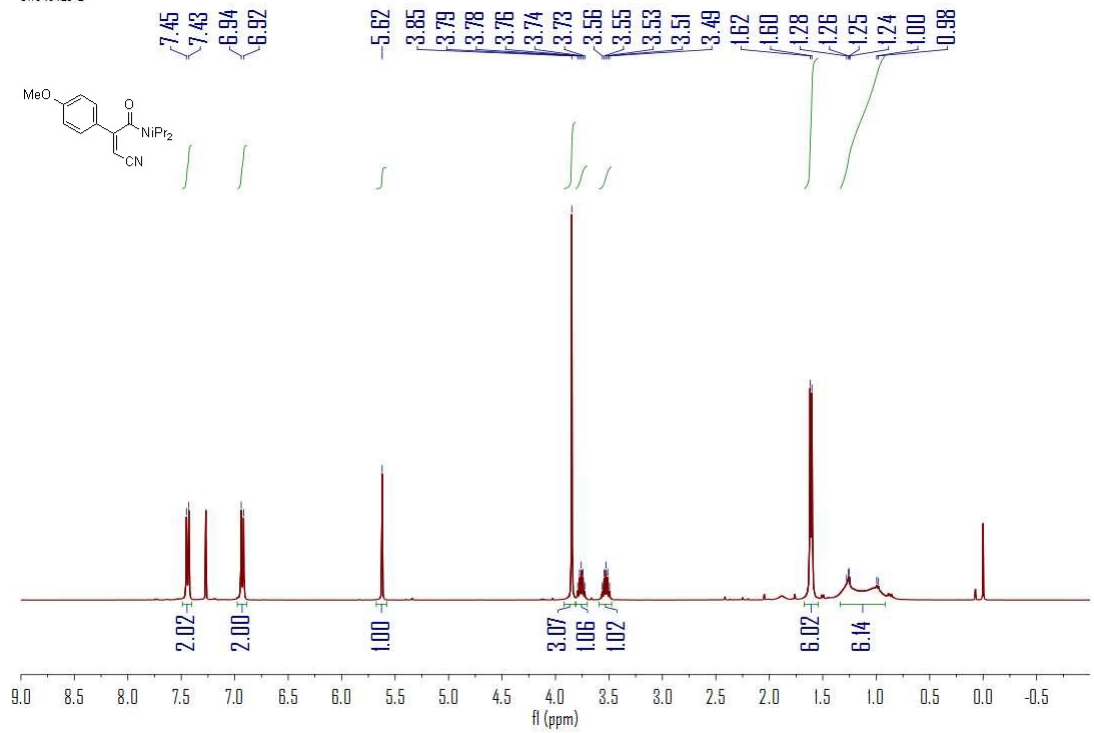

sw140425-2

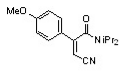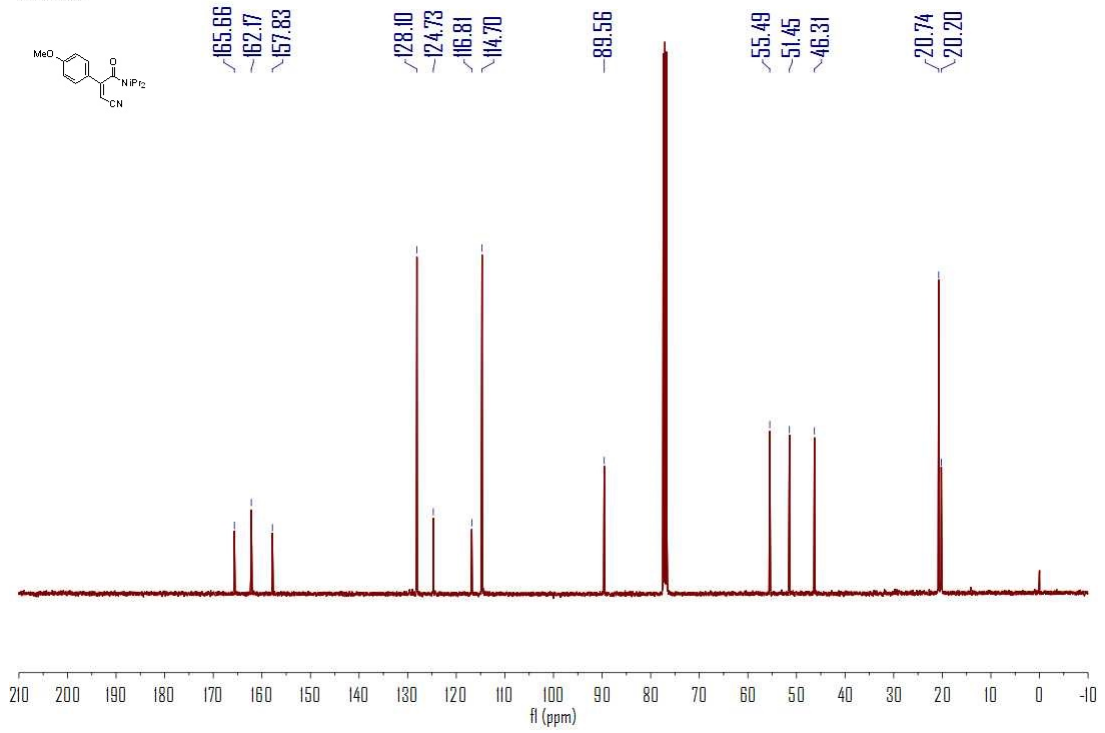

sw140425-1

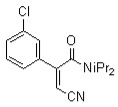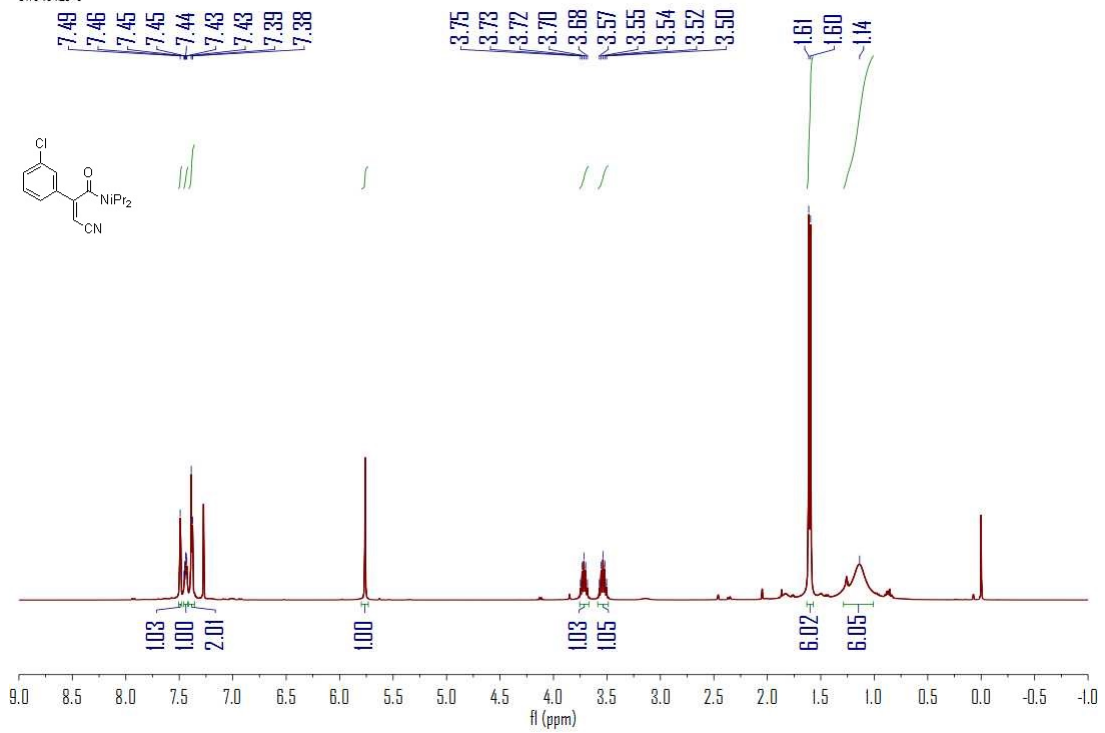

sw140425-1

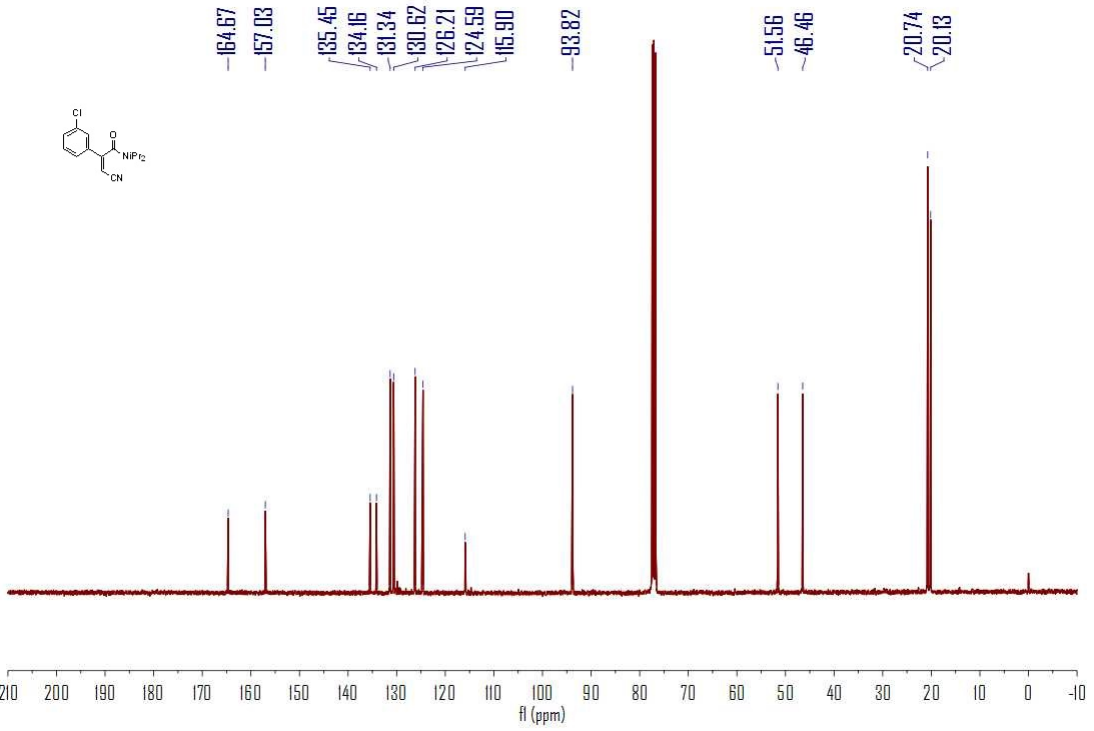

sw140425-3

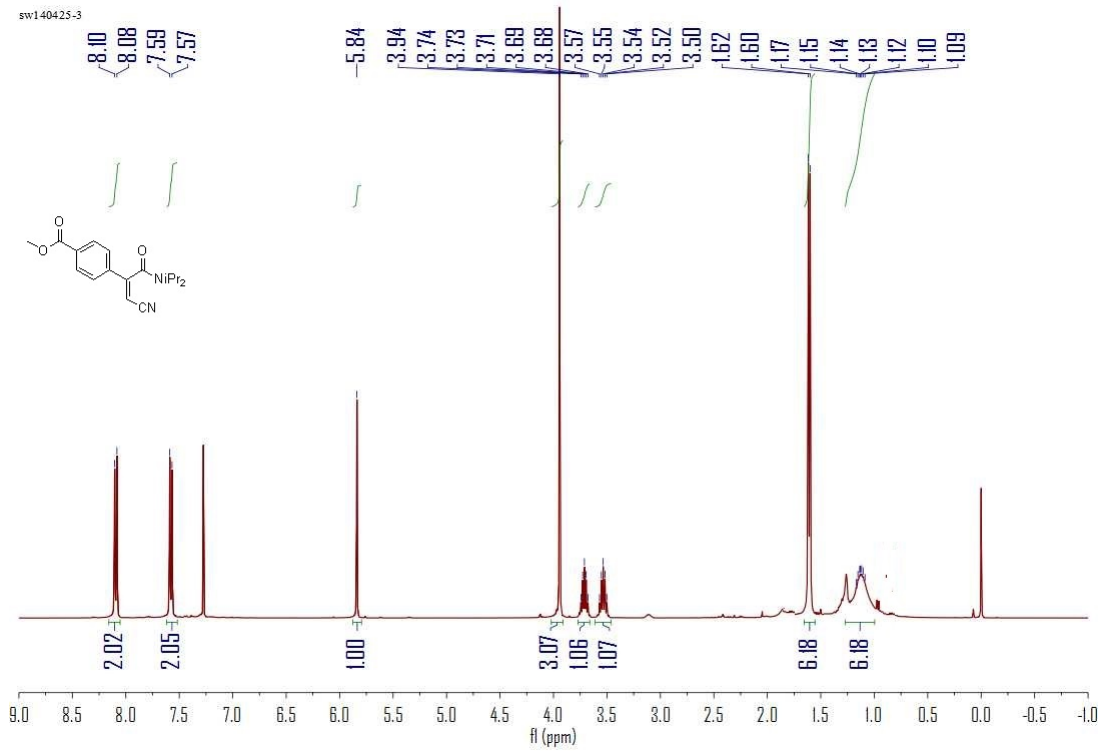



sw140521-3

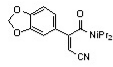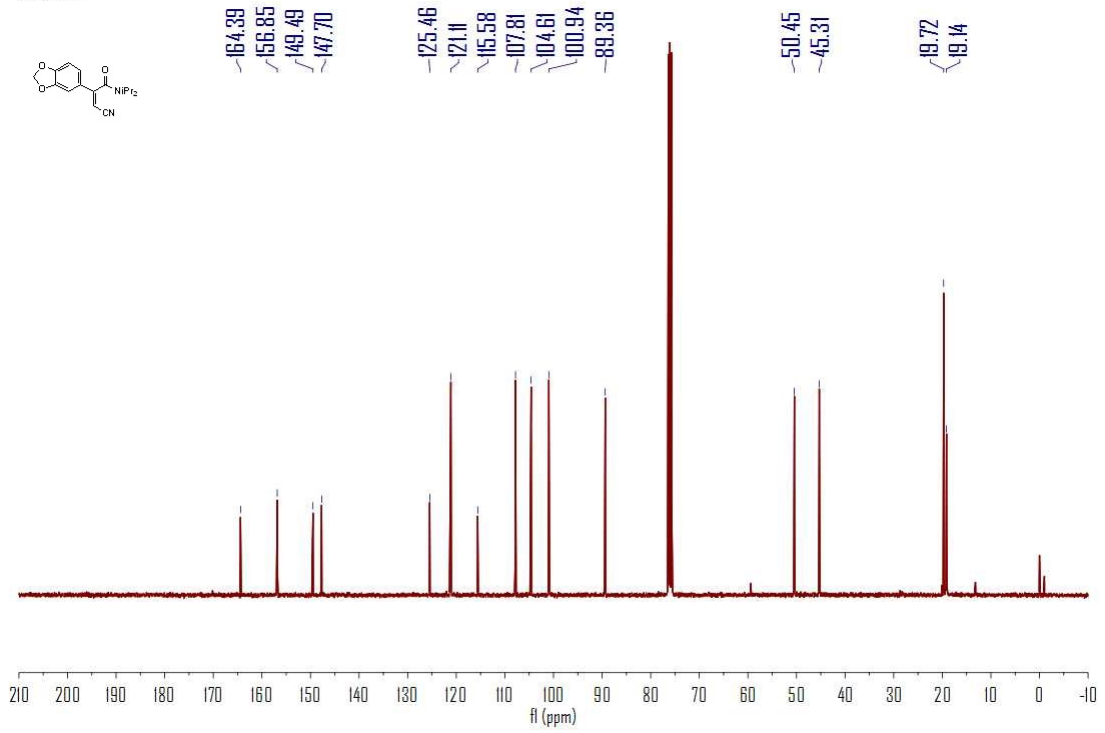

sw140530-1

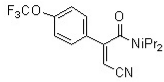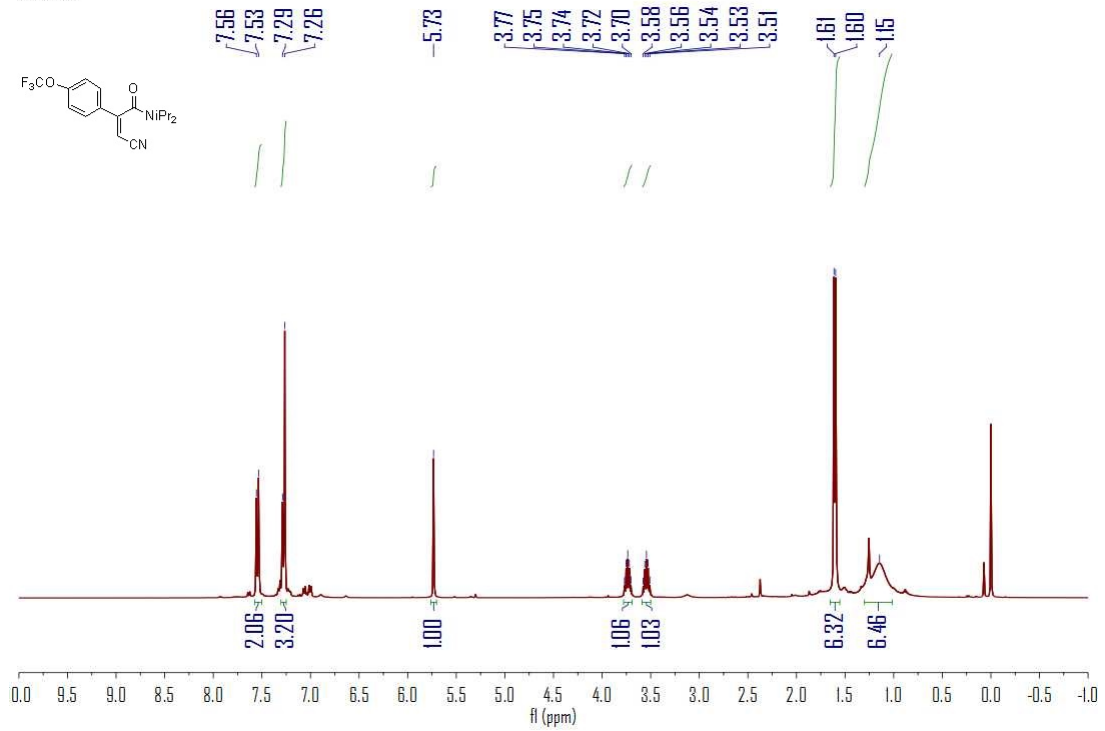

sw140530-1

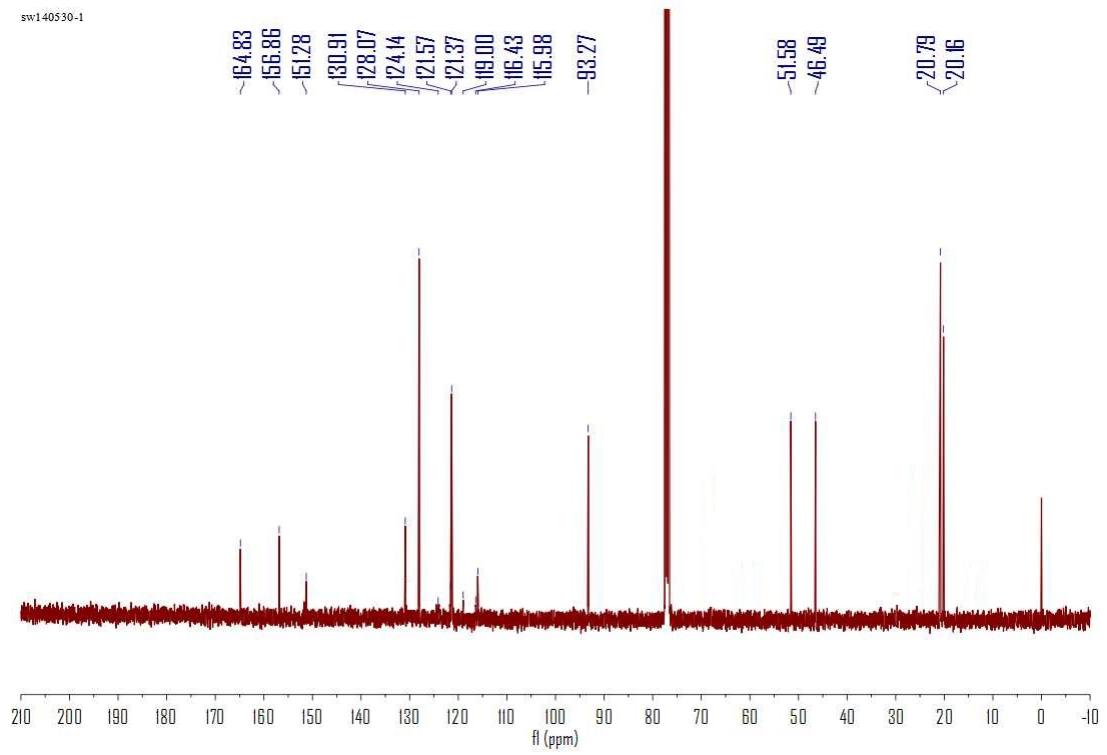

sw140530-1

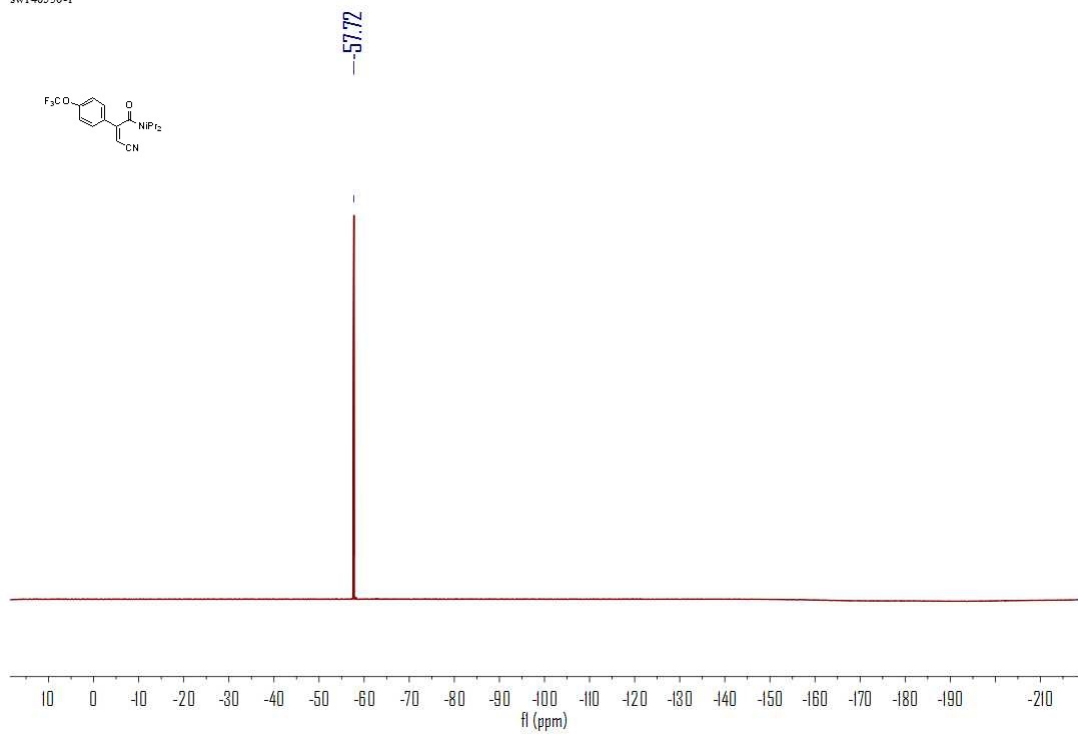



sw140507-1

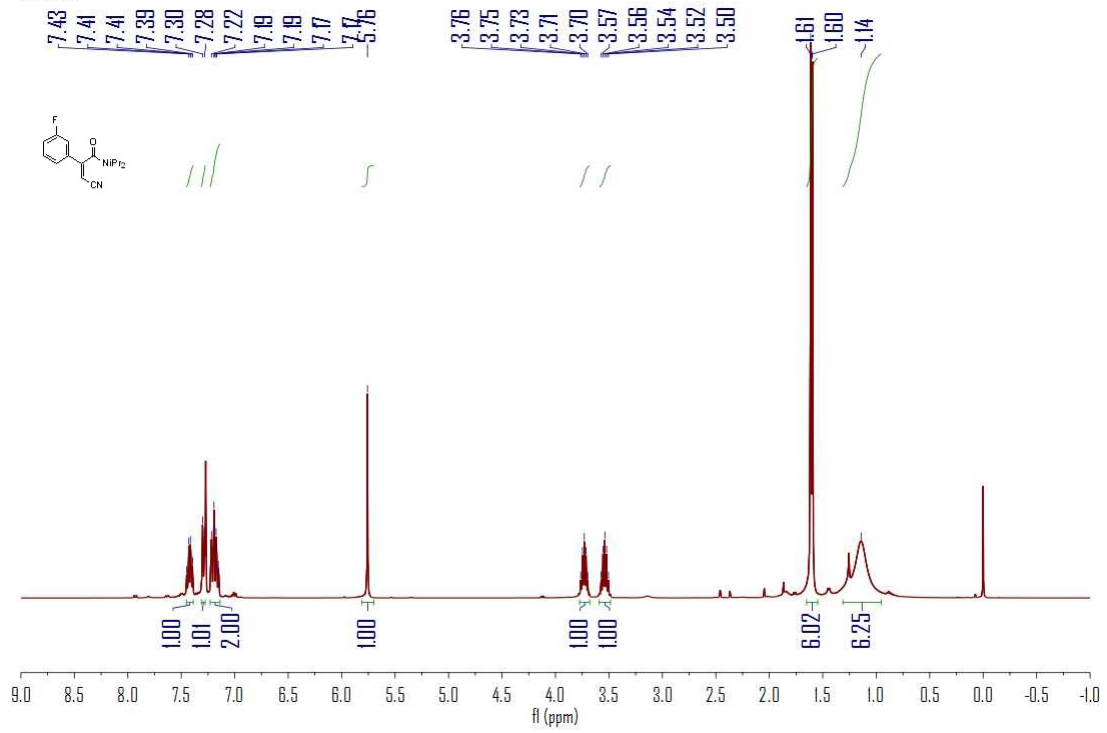

sw140507-1

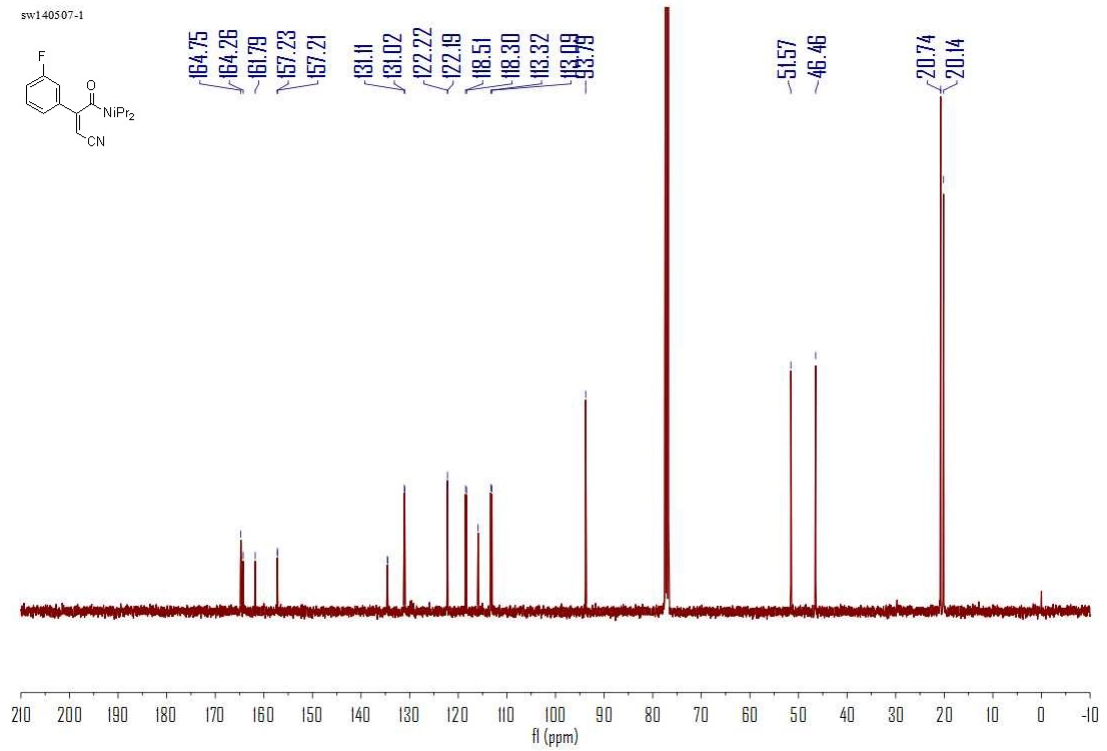

sw140507-1

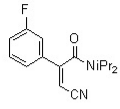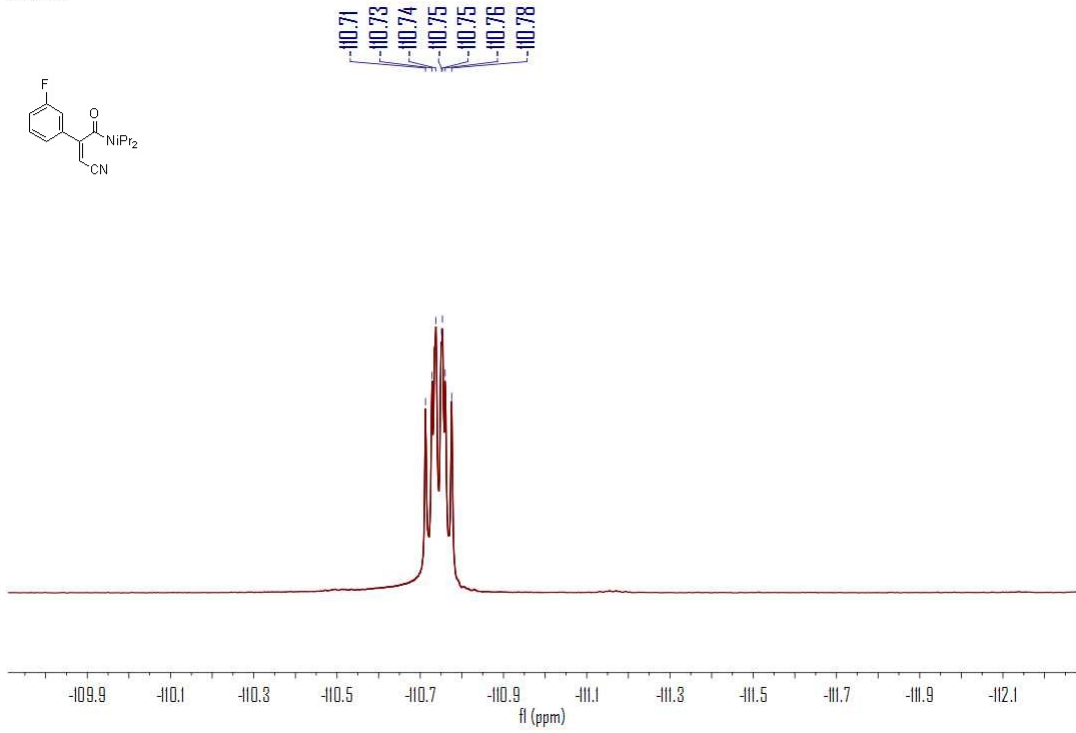

sw140507-3

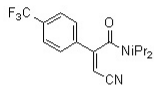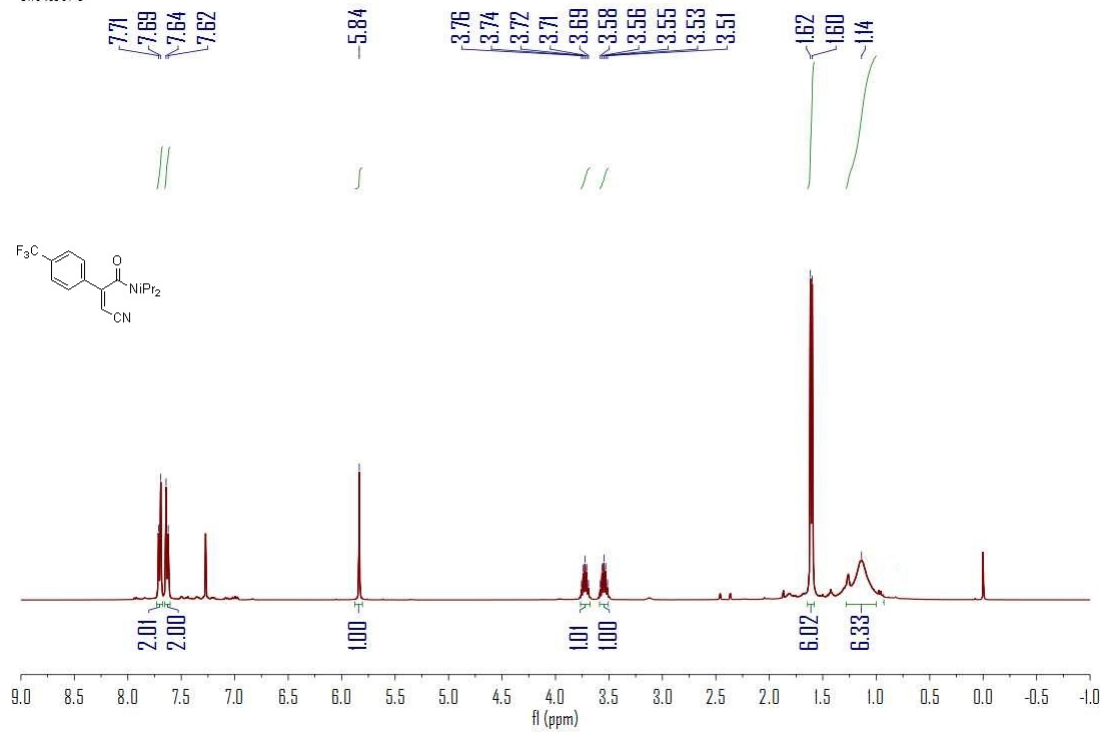

sw140507-3

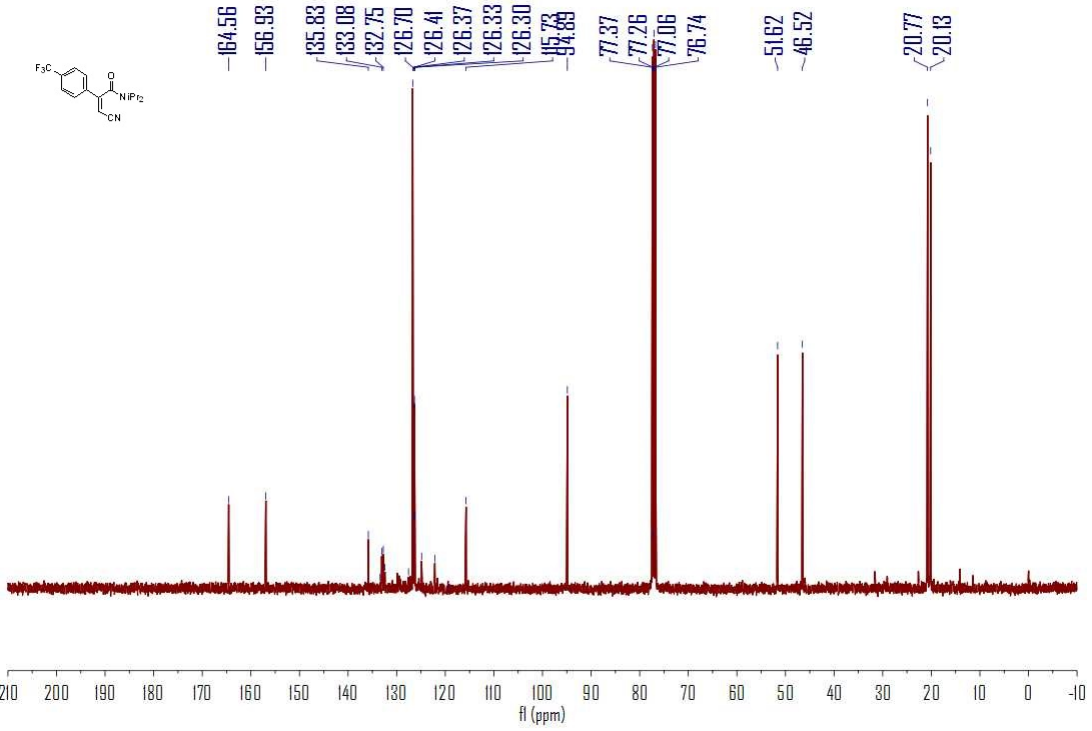

sw140507-3

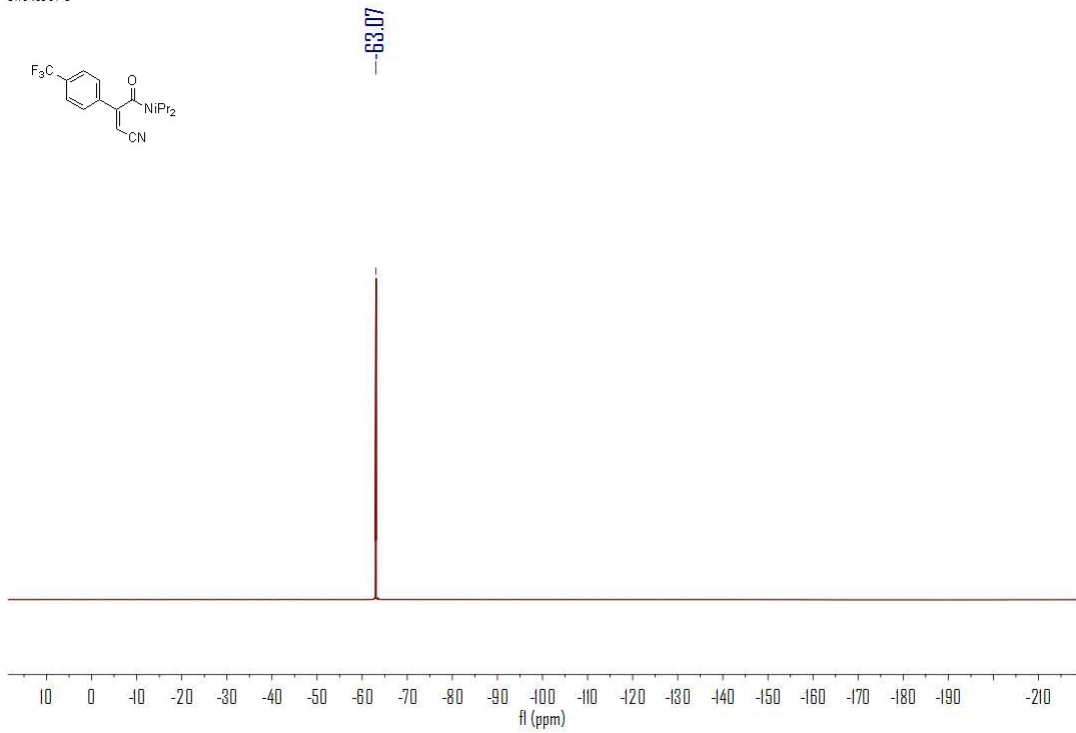

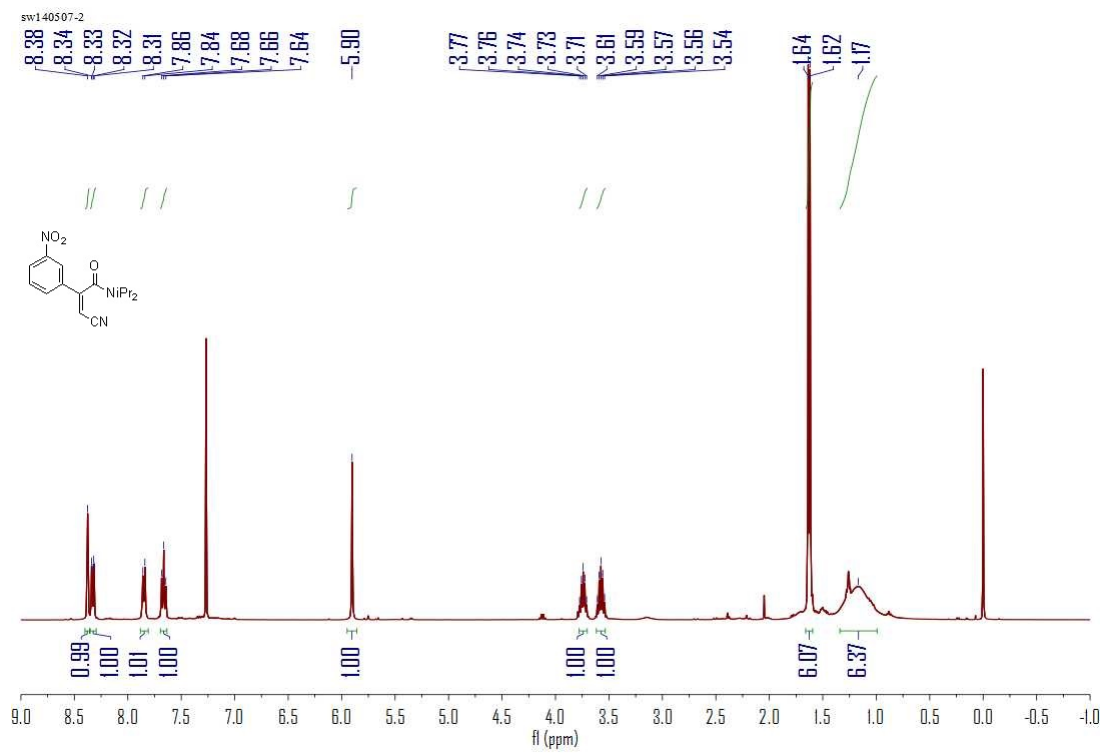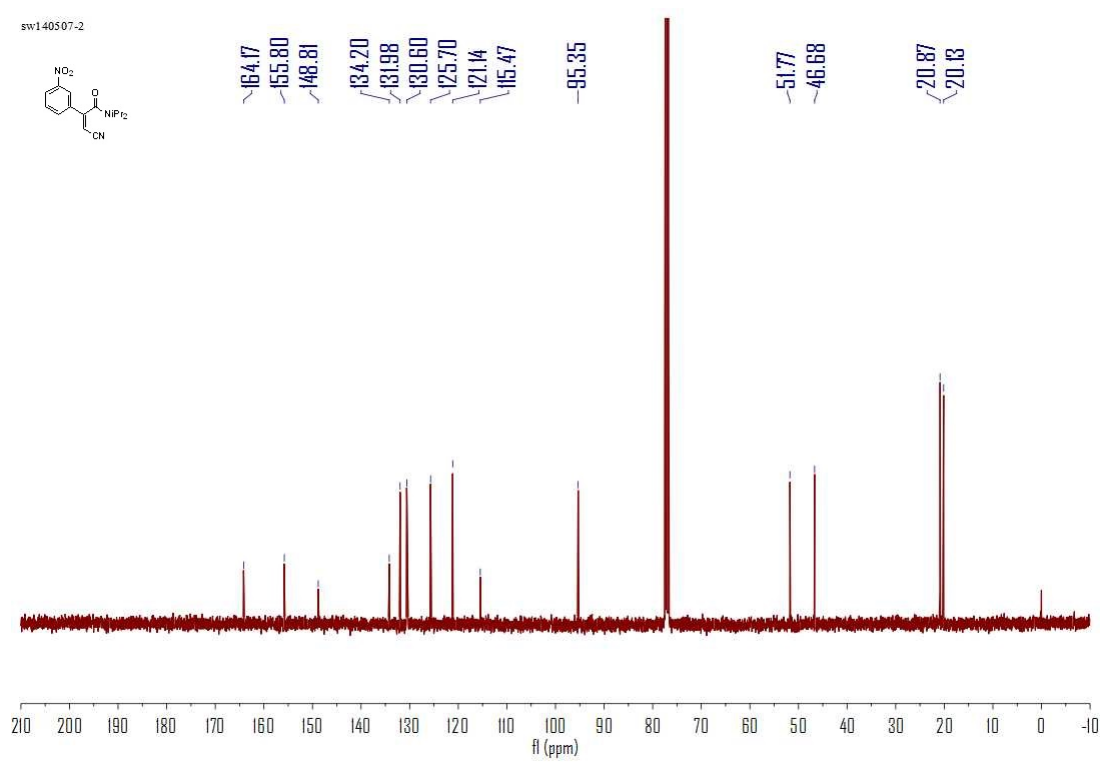

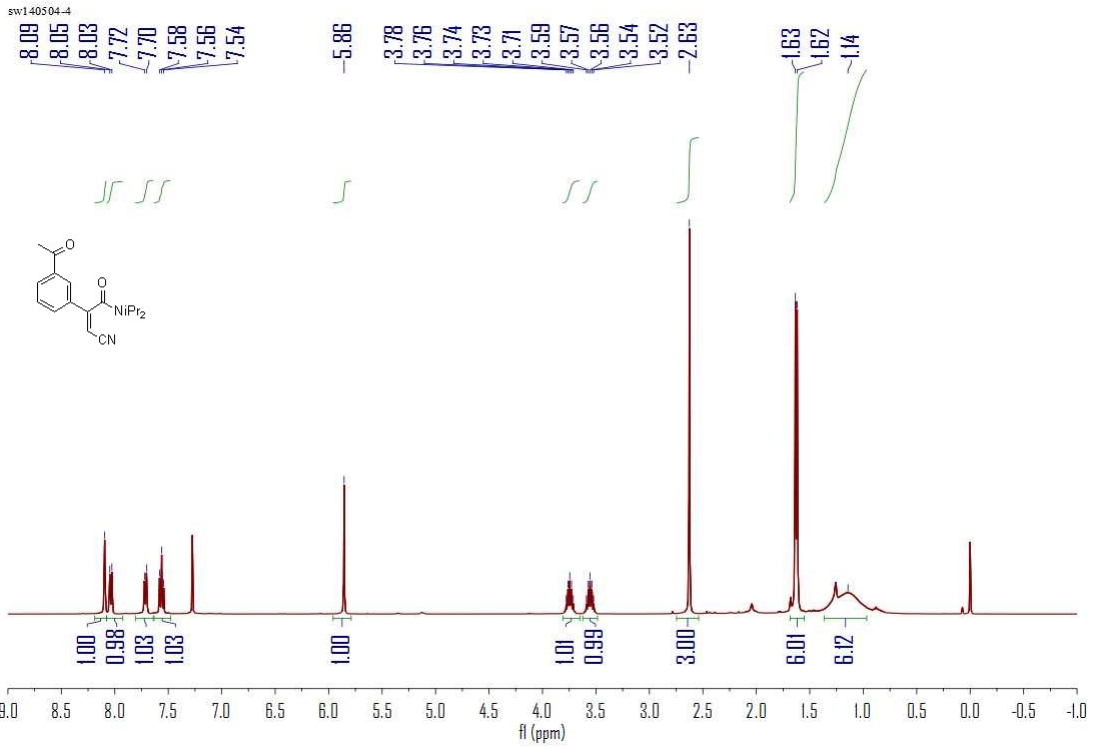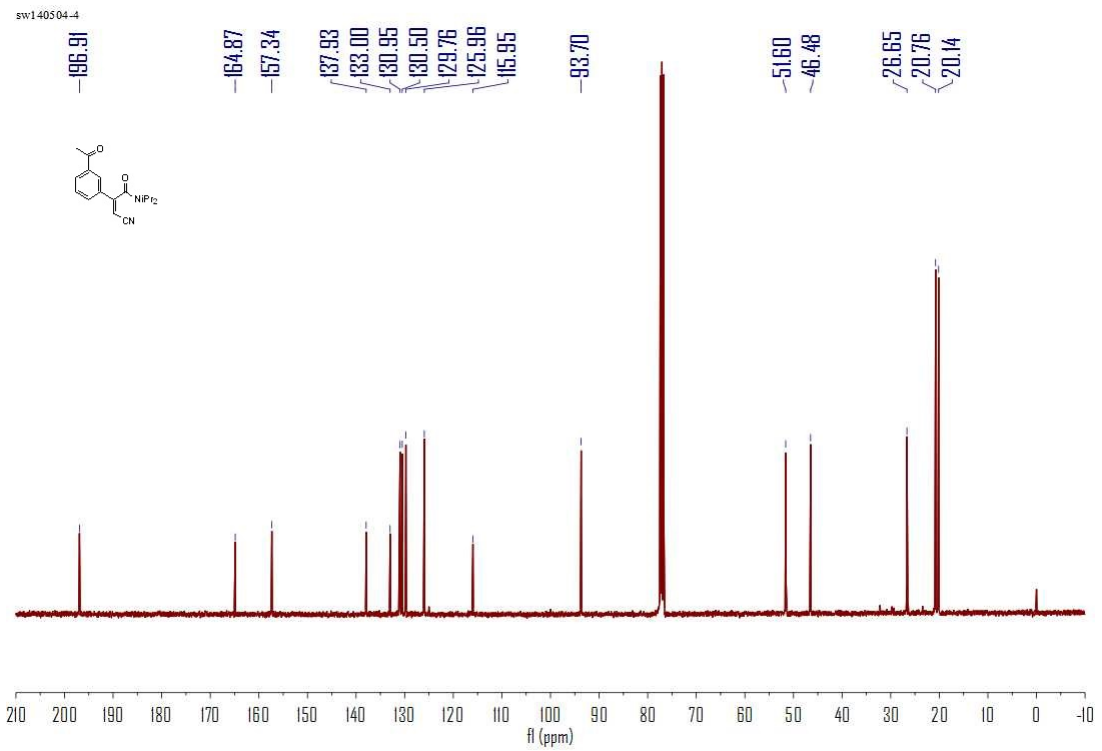

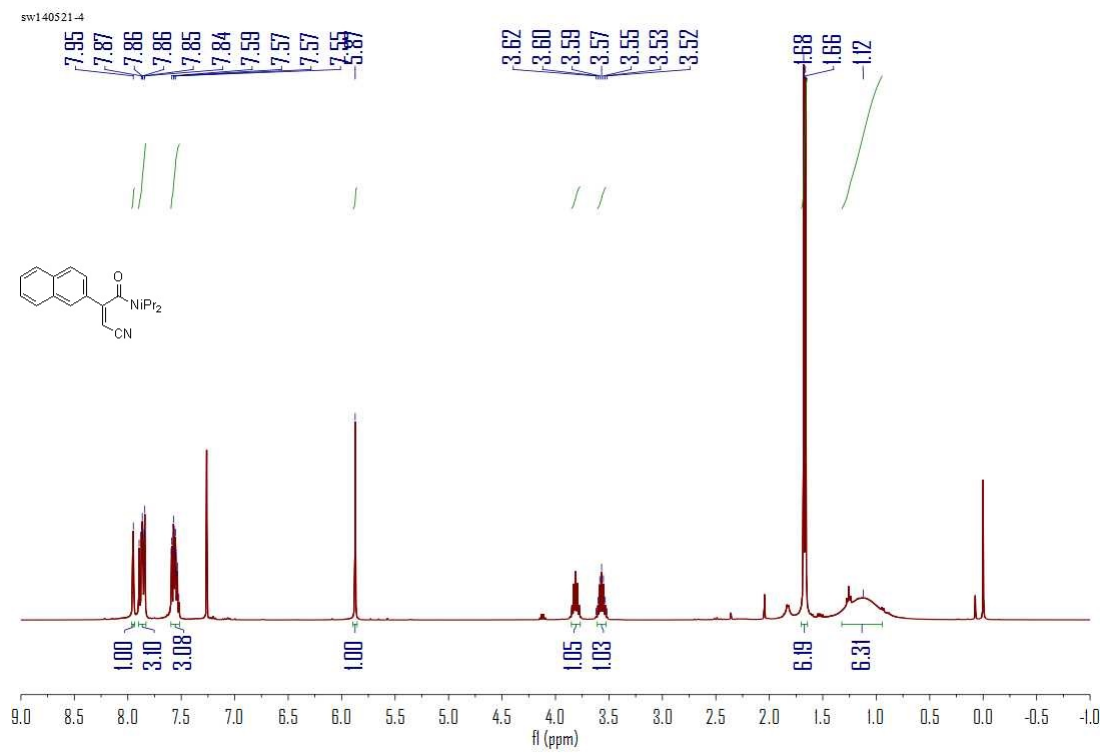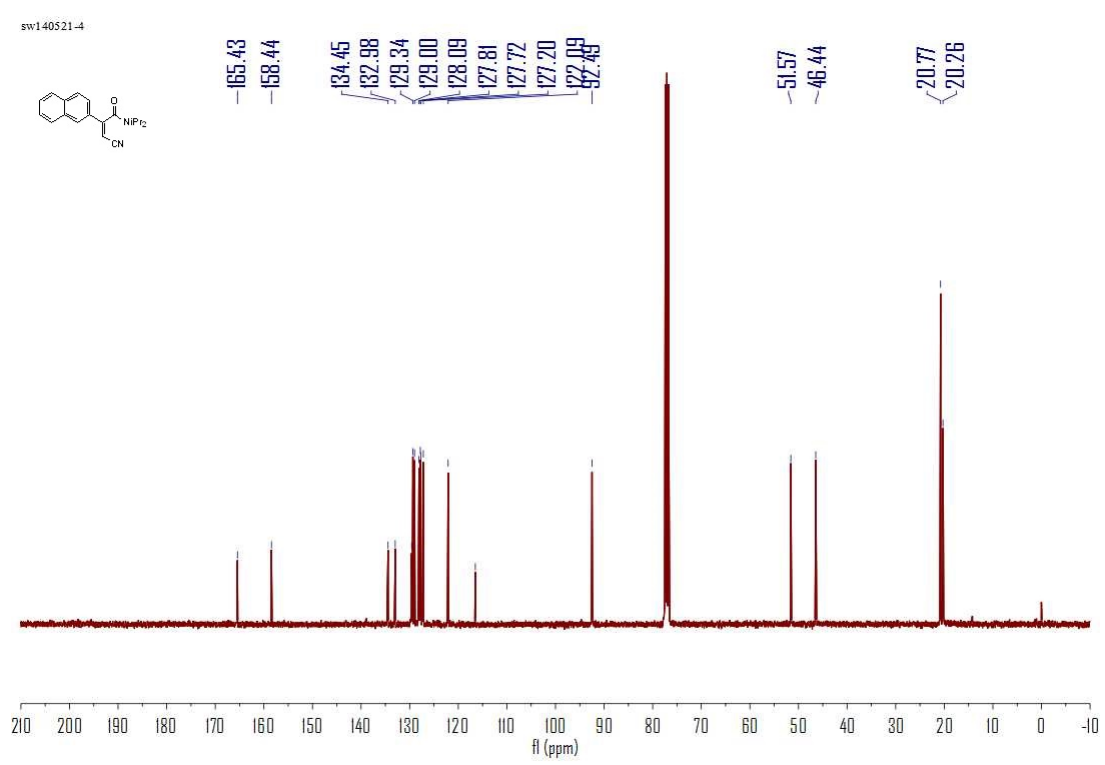

sw140516-1

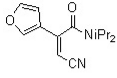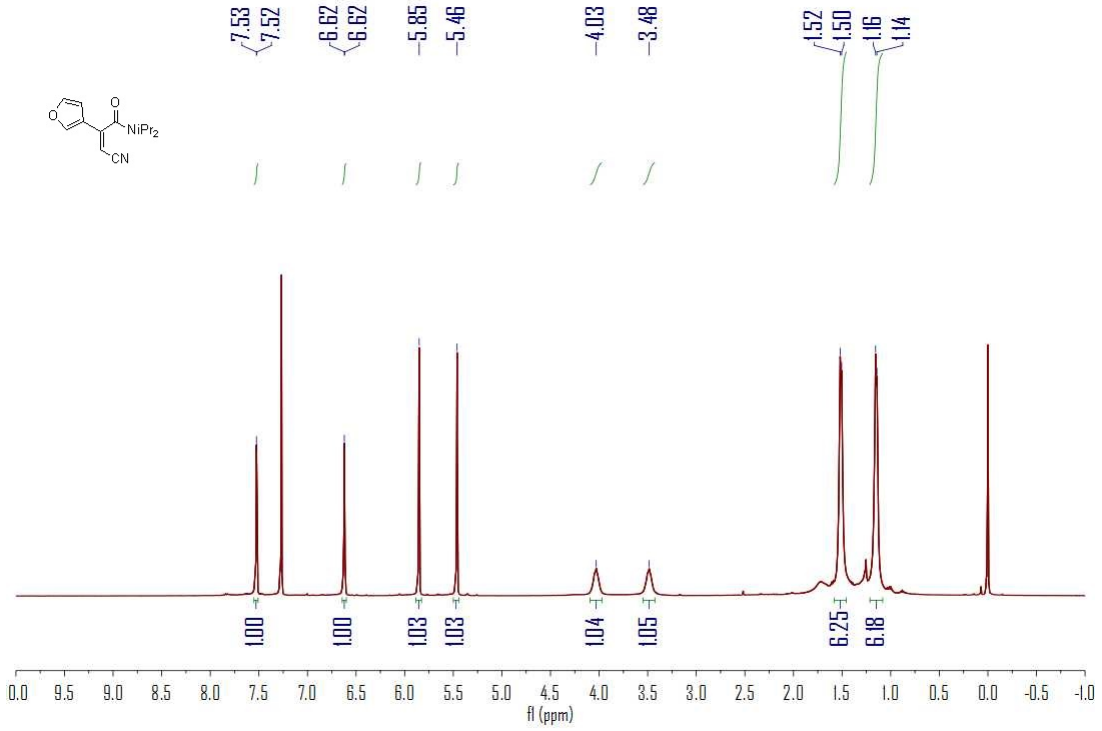

sw140516-1

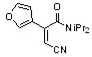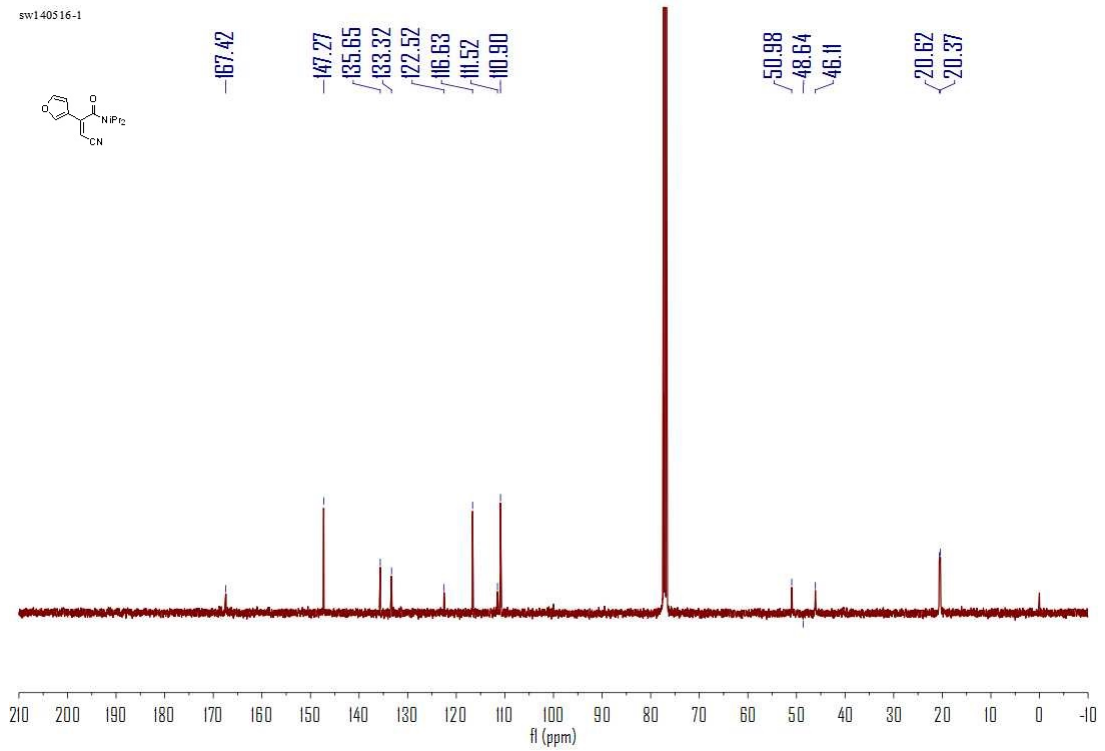

sw140504-2

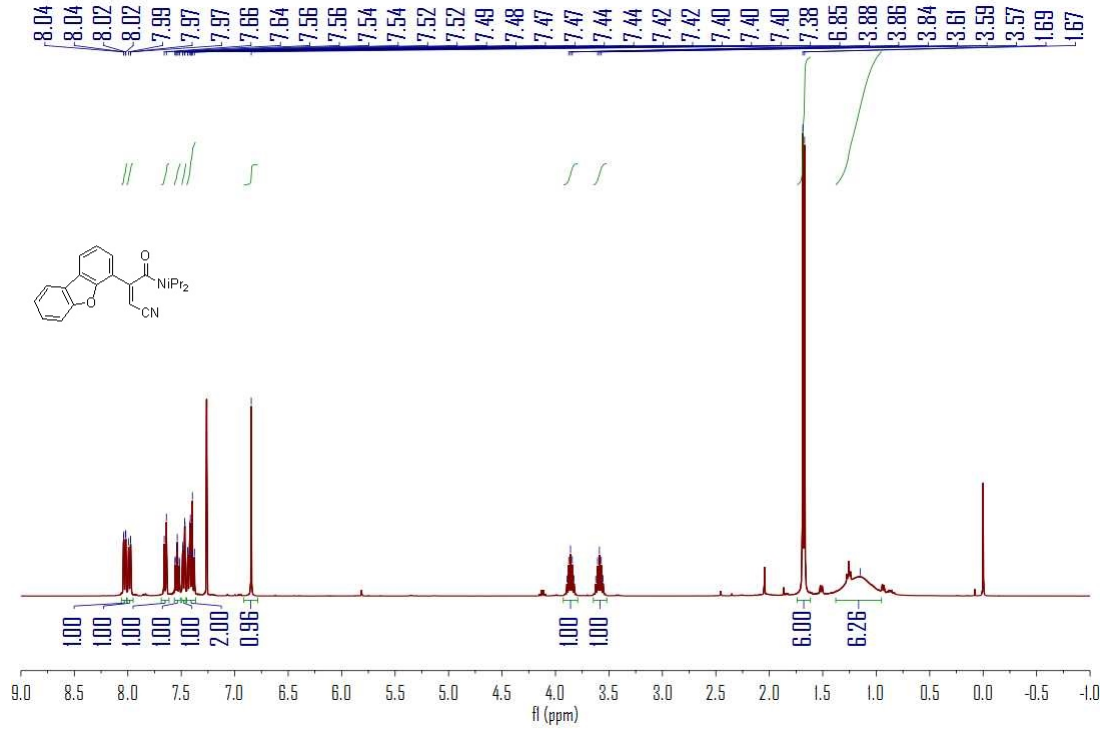

sw140504-2

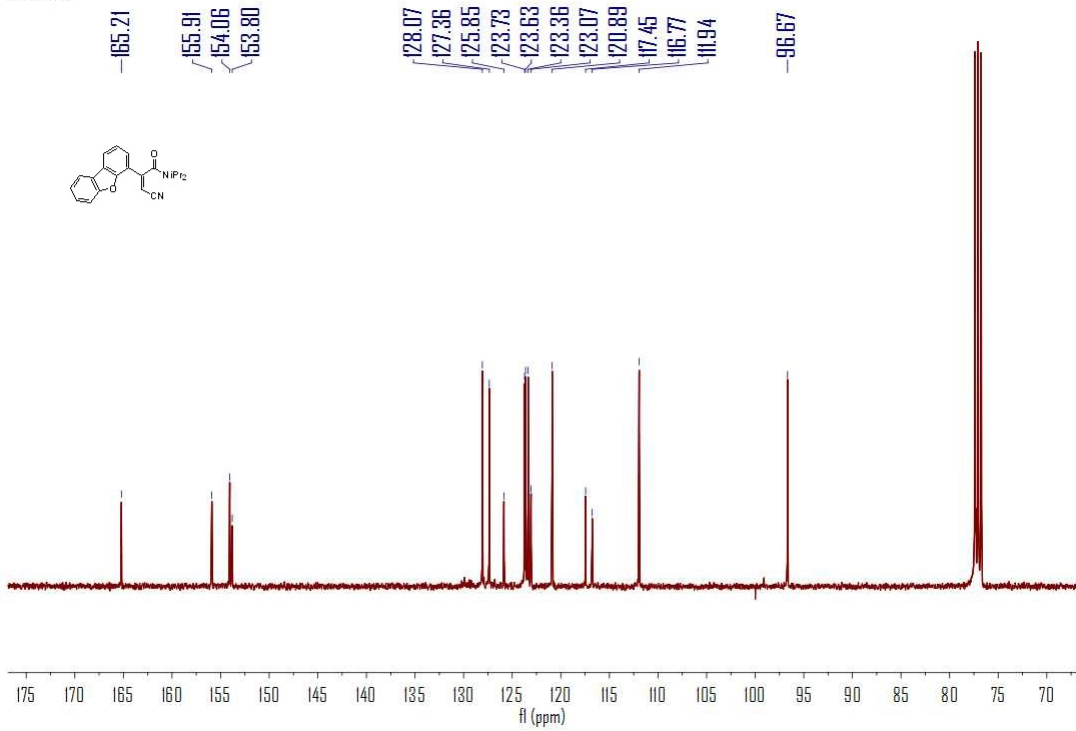



sw140407-1

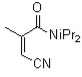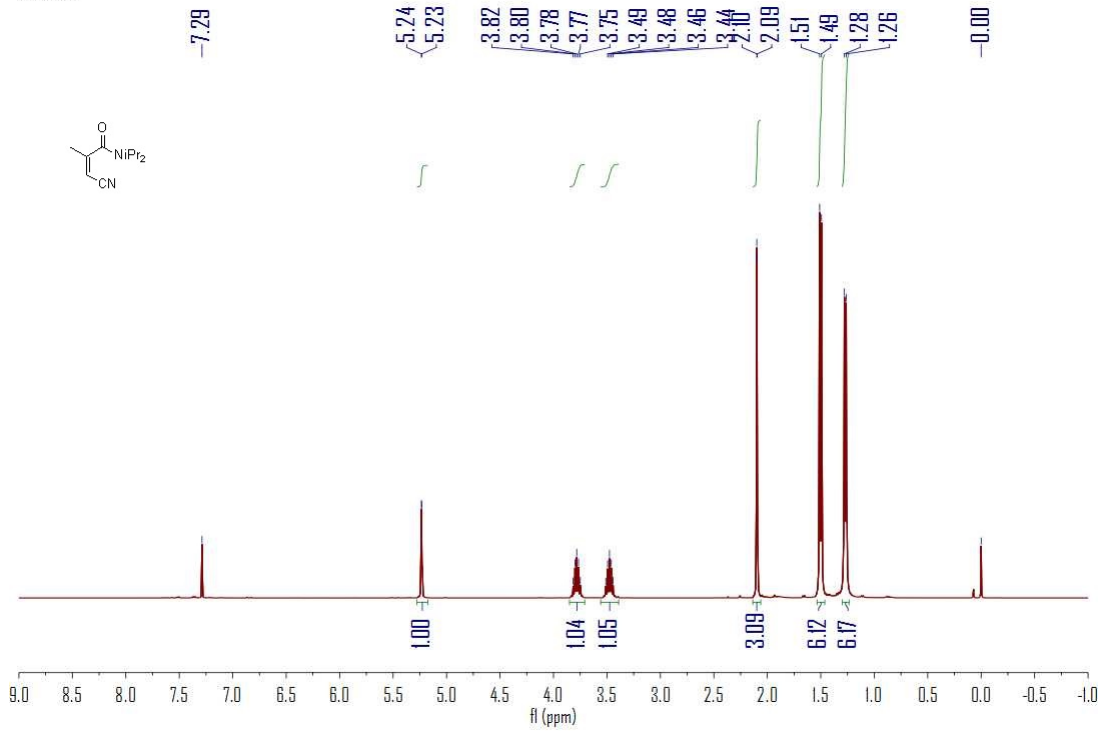

sw140407-1

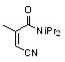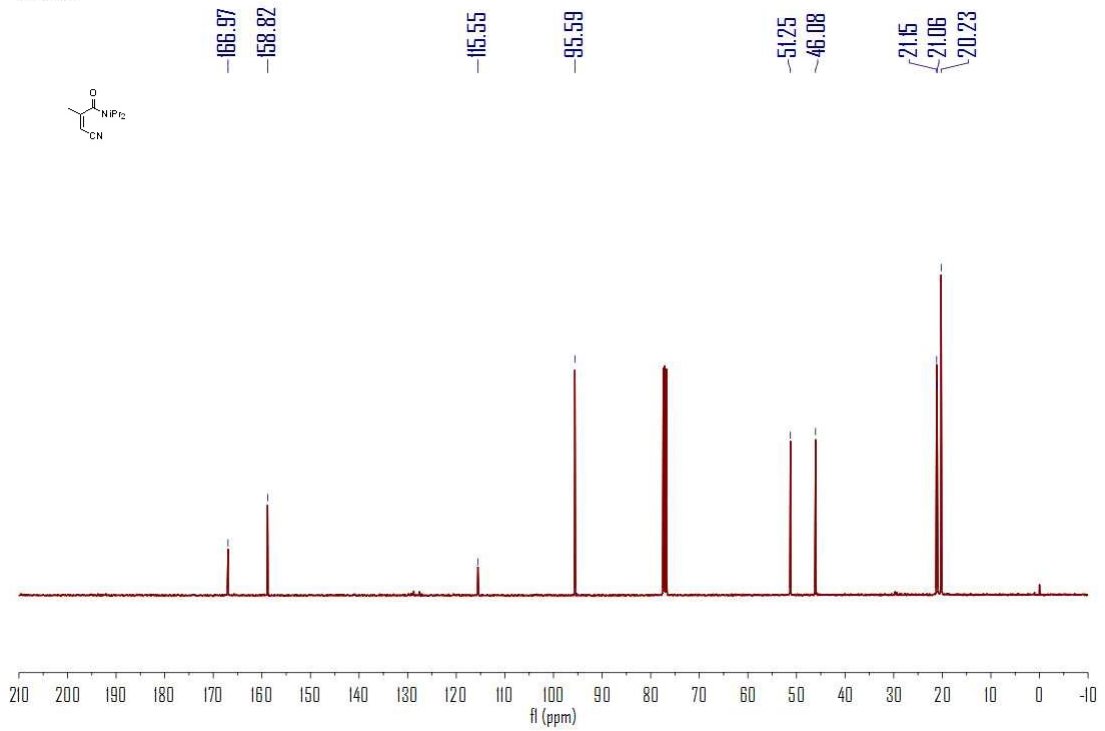

sw140710-1

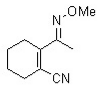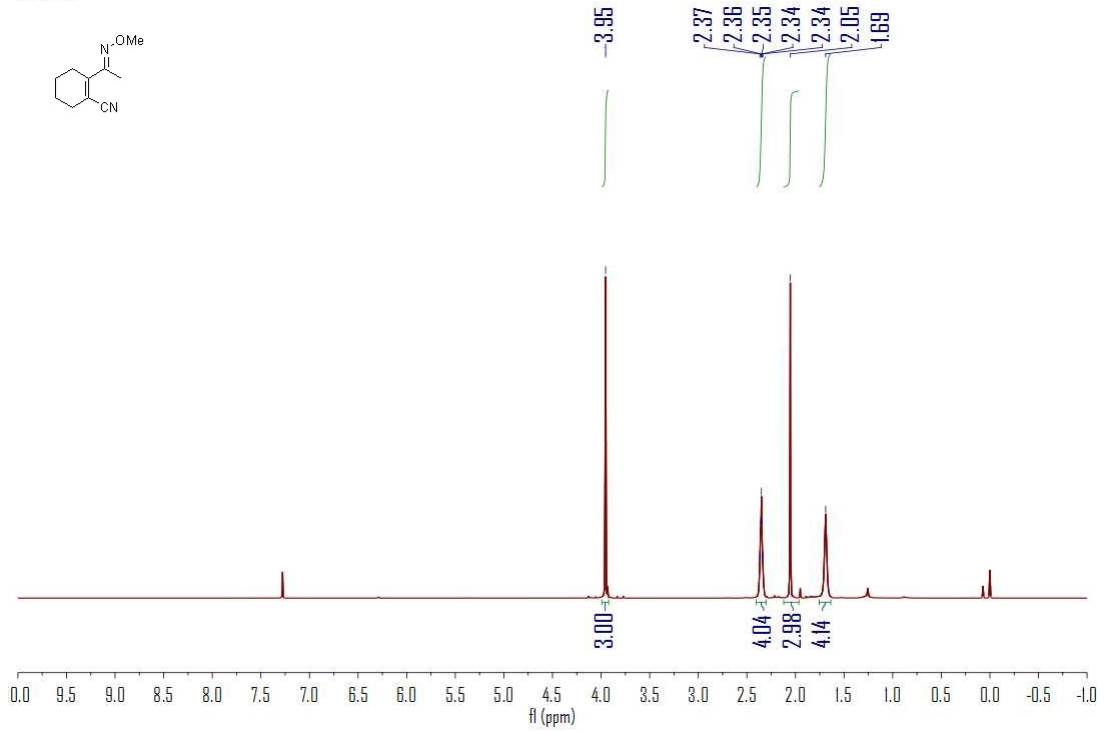

sw140524-1

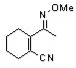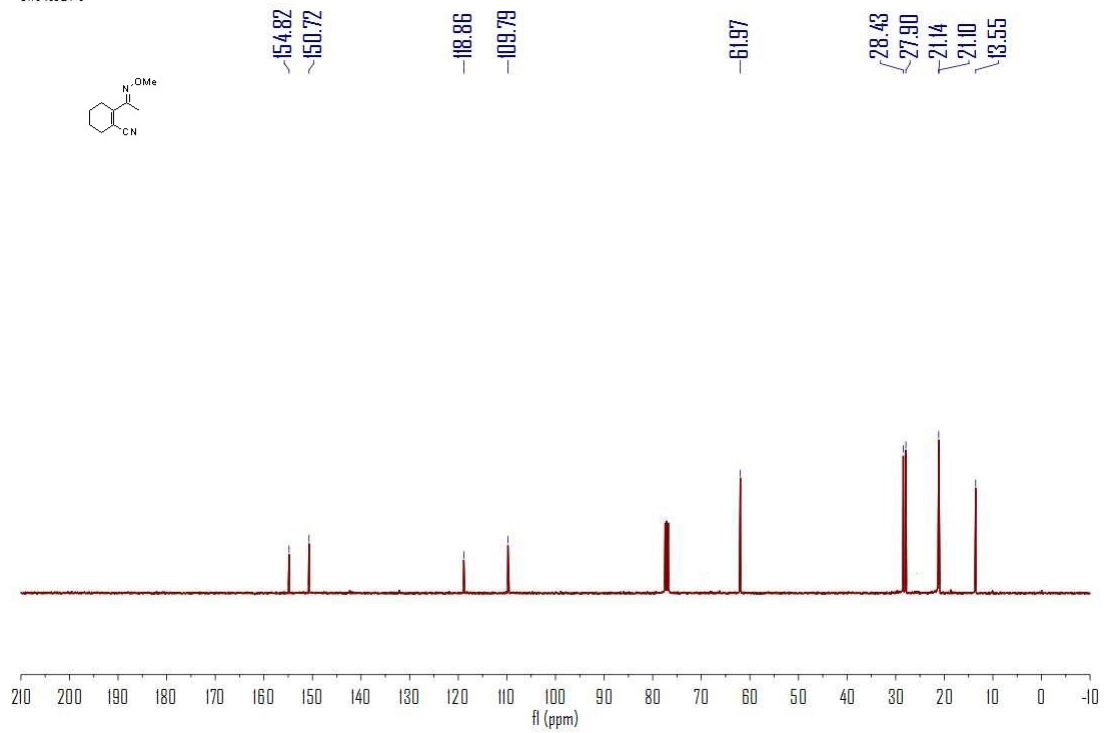

sw150507-2

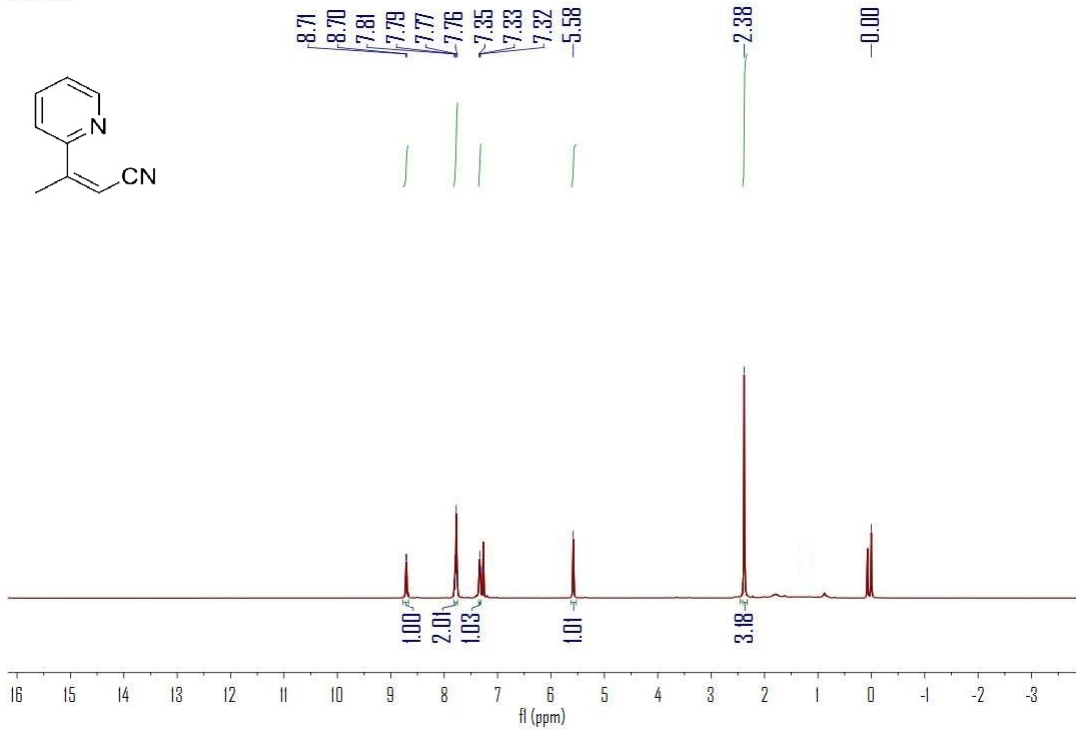

sw150507-2

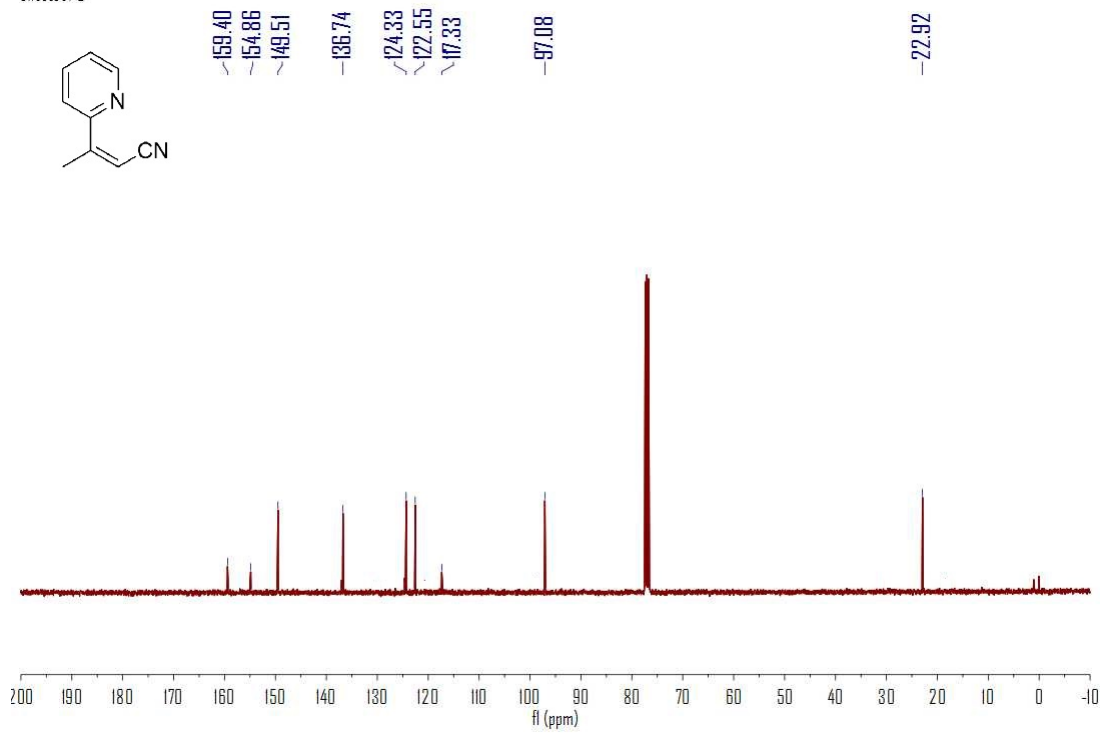

sw150407-3

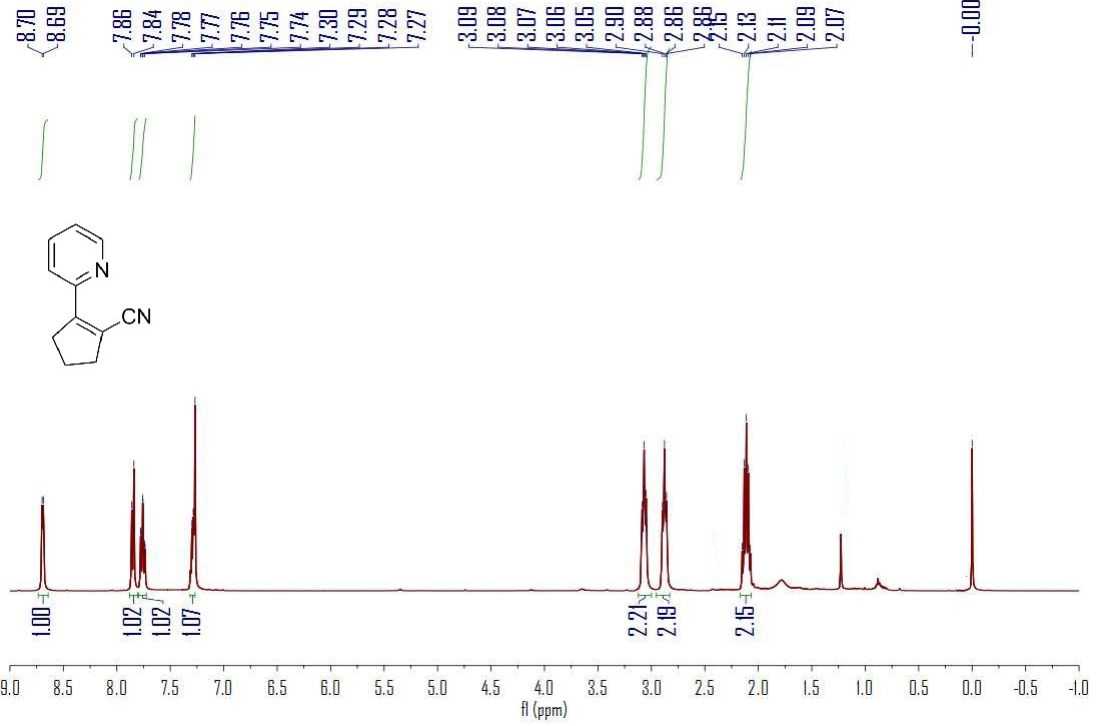

sw150407-3

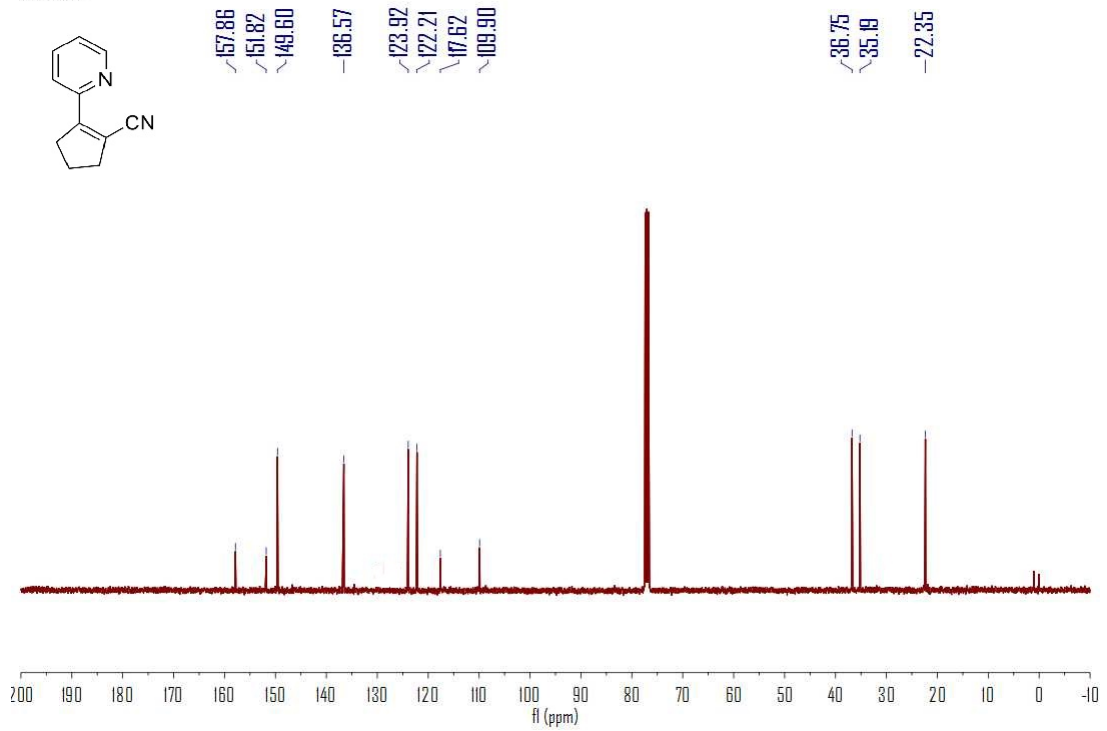

sw140604-1

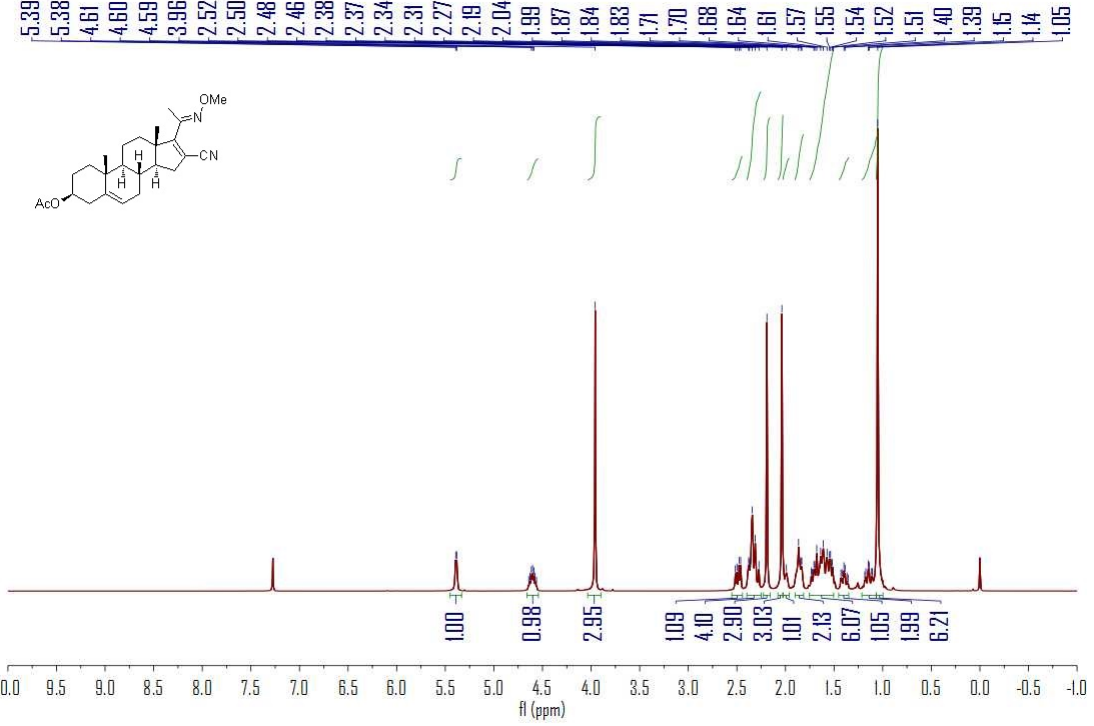

sw140604-1

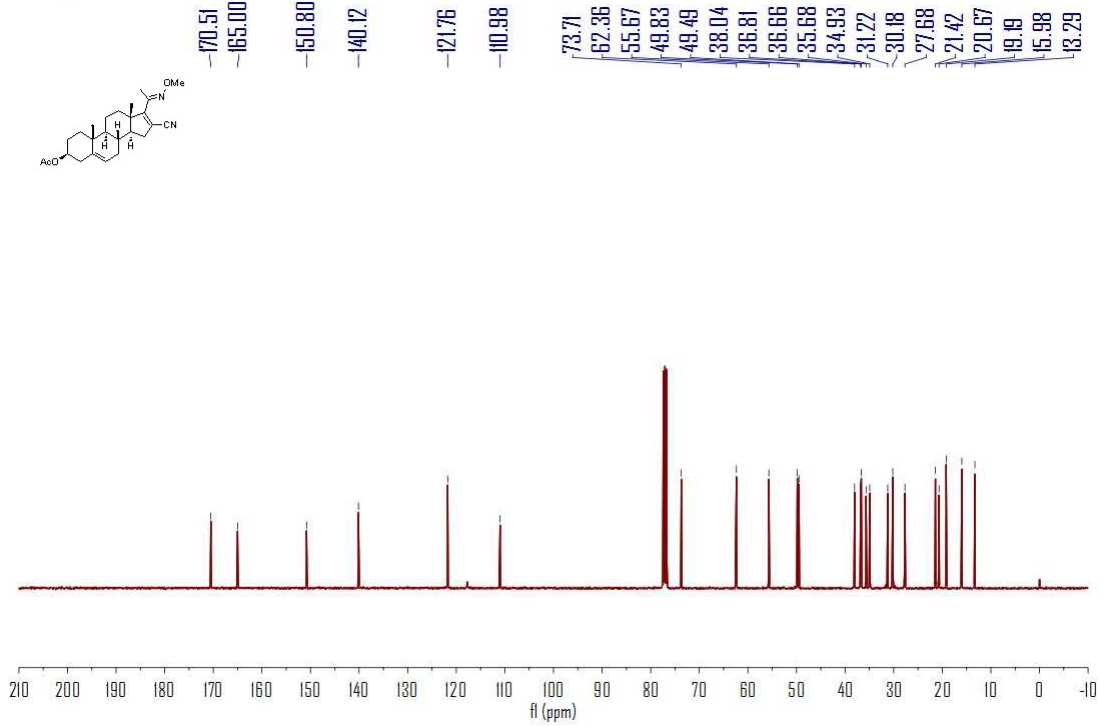

## V. X-ray Crystal data

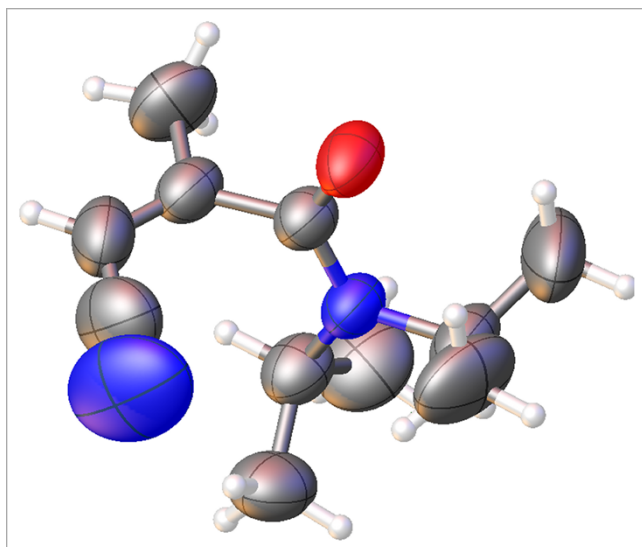

Table 1 Crystal data and structure refinement for SW140328-1.

|                                       |                                                  |
|---------------------------------------|--------------------------------------------------|
| Identification code                   | SW140328-1                                       |
| Empirical formula                     | C <sub>11</sub> H <sub>18</sub> N <sub>2</sub> O |
| Formula weight                        | 194.27                                           |
| Temperature/K                         | 291 (2)                                          |
| Crystal system                        | orthorhombic                                     |
| Space group                           | P2 <sub>1</sub> 2 <sub>1</sub> 2 <sub>1</sub>    |
| a/Å                                   | 7.3992 (4)                                       |
| b/Å                                   | 9.2492 (7)                                       |
| c/Å                                   | 18.3176 (11)                                     |
| α /°                                  | 90                                               |
| β /°                                  | 90                                               |
| γ /°                                  | 90                                               |
| Volume/Å <sup>3</sup>                 | 1253.60 (14)                                     |
| Z                                     | 4                                                |
| ρ <sub>calc</sub> /mg/mm <sup>3</sup> | 1.029                                            |
| m/mm <sup>-1</sup>                    | 0.527                                            |
| F(000)                                | 424.0                                            |
| Crystal size/mm <sup>3</sup>          | 0.36 × 0.3 × 0.21                                |
| Radiation                             | CuKα (λ = 1.54184)                               |
| 2θ range for data collection          | 10.716 to 138.7°                                 |

|                                                |                                                               |
|------------------------------------------------|---------------------------------------------------------------|
| Index ranges                                   | $-8 \leq h \leq 5, -11 \leq k \leq 11, -22 \leq l \leq 20$    |
| Reflections collected                          | 2813                                                          |
| Independent reflections                        | 2016 [ $R_{\text{int}} = 0.0185, R_{\text{sigma}} = 0.0302$ ] |
| Data/restraints/parameters                     | 2016/0/133                                                    |
| Goodness-of-fit on $F^2$                       | 1.065                                                         |
| Final R indexes [ $I \geq 2\sigma(I)$ ]        | $R_1 = 0.0457, wR_2 = 0.1288$                                 |
| Final R indexes [all data]                     | $R_1 = 0.0624, wR_2 = 0.1672$                                 |
| Largest diff. peak/hole / $e \text{ \AA}^{-3}$ | 0.12/-0.11                                                    |
| Flack parameter                                | 1.6(5)                                                        |

Table 2 Fractional Atomic Coordinates ( $\times 10^4$ ) and Equivalent Isotropic Displacement Parameters ( $\text{\AA}^2 \times 10^3$ ) for SW140328-1.  $U_{\text{eq}}$  is defined as 1/3 of of the trace of the orthogonalised  $U_{\text{IJ}}$  tensor.

| Atom | $x$       | $y$      | $z$         | $U(\text{eq})$ |
|------|-----------|----------|-------------|----------------|
| O1   | -5846(3)  | -138(3)  | -729.1(14)  | 92.8(9)        |
| N1   | -8665(3)  | 433(3)   | -1128.2(14) | 73.2(8)        |
| C2   | -7499(4)  | -252(4)  | -693.8(17)  | 69.1(8)        |
| C3   | -8224(4)  | -1268(4) | -129.7(17)  | 75.8(9)        |
| C5   | -8540(5)  | -2666(5) | -293(3)     | 96.2(13)       |
| C7   | -10639(4) | 317(5)   | -1025(2)    | 83.1(10)       |
| C4   | -8398(7)  | -706(6)  | 628.3(19)   | 113.7(15)      |
| C6   | -8356(9)  | -3196(5) | -1010(3)    | 121.0(16)      |
| N2   | -8251(13) | -3627(6) | -1583(4)    | 198(3)         |
| C10  | -7980(6)  | 1345(6)  | -1728(2)    | 102.5(14)      |
| C8   | -11571(6) | -403(6)  | -1653(2)    | 110.8(14)      |
| C11  | -6978(8)  | 447(9)   | -2284(2)    | 149(3)         |
| C9   | -11480(7) | 1804(6)  | -850(3)     | 130.2(18)      |
| C12  | -6923(9)  | 2650(6)  | -1456(4)    | 149(2)         |

Table 3 Anisotropic Displacement Parameters ( $\text{\AA}^2 \times 10^3$ ) for SW140328-1.  
 The Anisotropic displacement factor exponent takes the form: -  
 $2 \pi^2 [h^2 a^2 U_{11} + 2 h k a^2 b^2 U_{12} + \dots]$ .

| Atom | $U_{11}$  | $U_{22}$  | $U_{33}$   | $U_{23}$  | $U_{13}$  | $U_{12}$  |
|------|-----------|-----------|------------|-----------|-----------|-----------|
| O1   | 66.4 (13) | 108 (2)   | 103.9 (17) | 42.5 (16) | -5.7 (11) | -1.6 (13) |
| N1   | 70.4 (15) | 81.5 (17) | 67.6 (13)  | 19.2 (14) | -4.7 (11) | 0.2 (13)  |
| C2   | 66.0 (17) | 75.6 (19) | 65.7 (15)  | 11.3 (16) | -2.9 (13) | 1.1 (15)  |
| C3   | 68.4 (17) | 93 (2)    | 66.6 (17)  | 18.9 (17) | -2.4 (14) | 1.3 (19)  |
| C5   | 89 (2)    | 87 (3)    | 112 (3)    | 35 (2)    | -6 (2)    | -11 (2)   |
| C7   | 71.9 (19) | 94 (2)    | 83 (2)     | 16 (2)    | -1.3 (15) | 10.8 (18) |
| C4   | 136 (4)   | 137 (4)   | 68 (2)     | 8 (2)     | 4 (2)     | 6 (3)     |
| C6   | 151 (4)   | 85 (3)    | 127 (4)    | -13 (3)   | -16 (4)   | 7 (3)     |
| N2   | 281 (9)   | 136 (4)   | 176 (5)    | -65 (4)   | -32 (5)   | 50 (5)    |
| C10  | 88 (3)    | 129 (3)   | 90 (2)     | 53 (3)    | -10 (2)   | -7 (2)    |
| C8   | 84 (2)    | 142 (4)   | 106 (3)    | 7 (3)     | -21 (2)   | -7 (3)    |
| C11  | 131 (4)   | 238 (7)   | 78 (2)     | 46 (4)    | 17 (3)    | 2 (5)     |
| C9   | 111 (3)   | 136 (4)   | 144 (4)    | 7 (3)     | 1 (3)     | 44 (3)    |
| C12  | 142 (5)   | 119 (4)   | 187 (5)    | 81 (4)    | -40 (4)   | -40 (4)   |

Table 4 Bond Lengths for SW140328-1.

| Atom | Atom | Length/ $\text{\AA}$ | Atom | Atom | Length/ $\text{\AA}$ |
|------|------|----------------------|------|------|----------------------|
| O1   | C2   | 1.229 (4)            | C5   | C6   | 1.407 (7)            |
| N1   | C2   | 1.334 (4)            | C7   | C8   | 1.498 (6)            |
| N1   | C7   | 1.476 (4)            | C7   | C9   | 1.544 (6)            |
| N1   | C10  | 1.474 (4)            | C6   | N2   | 1.125 (7)            |
| C2   | C3   | 1.496 (4)            | C10  | C11  | 1.510 (8)            |
| C3   | C5   | 1.348 (5)            | C10  | C12  | 1.523 (7)            |
| C3   | C4   | 1.488 (5)            |      |      |                      |

Table 5 Bond Angles for SW140328-1.

| Atom | Atom | Atom | Angle/    | Atom | Atom | Atom | Angle/    |
|------|------|------|-----------|------|------|------|-----------|
| C2   | N1   | C7   | 121.9 (3) | C3   | C5   | C6   | 121.6 (4) |
| C2   | N1   | C10  | 119.6 (3) | N1   | C7   | C8   | 112.9 (3) |
| C10  | N1   | C7   | 118.5 (3) | N1   | C7   | C9   | 111.1 (4) |
| O1   | C2   | N1   | 124.9 (3) | C8   | C7   | C9   | 111.7 (4) |
| O1   | C2   | C3   | 116.6 (3) | N2   | C6   | C5   | 178.3 (8) |



|    |    |    |          |     |     |     |          |
|----|----|----|----------|-----|-----|-----|----------|
| N1 | C2 | C3 | 118.5(3) | N1  | C10 | C11 | 110.9(4) |
| C5 | C3 | C2 | 120.7(3) | N1  | C10 | C12 | 112.8(4) |
| C5 | C3 | C4 | 121.9(4) | C11 | C10 | C12 | 113.9(5) |
| C4 | C3 | C2 | 117.1(4) |     |     |     |          |

**Table 6** Torsion Angles for SW140328-1.

| A  | B  | C   | D   | Angle/    | A   | B  | C   | D   | Angle/    |
|----|----|-----|-----|-----------|-----|----|-----|-----|-----------|
| O1 | C2 | C3  | C5  | -91.1(4)  | C7  | N1 | C2  | O1  | -176.0(4) |
| O1 | C2 | C3  | C4  | 82.9(5)   | C7  | N1 | C2  | C3  | 5.6(5)    |
| N1 | C2 | C3  | C5  | 87.5(4)   | C7  | N1 | C10 | C11 | -116.2(4) |
| N1 | C2 | C3  | C4  | -98.6(4)  | C7  | N1 | C10 | C12 | 114.8(5)  |
| C2 | N1 | C7  | C8  | -115.7(4) | C4  | C3 | C5  | C6  | -179.3(4) |
| C2 | N1 | C7  | C9  | 117.8(4)  | C10 | N1 | C2  | O1  | 3.5(6)    |
| C2 | N1 | C10 | C11 | 64.3(5)   | C10 | N1 | C2  | C3  | -174.9(4) |
| C2 | N1 | C10 | C12 | -64.8(5)  | C10 | N1 | C7  | C8  | 64.8(5)   |
| C2 | C3 | C5  | C6  | -5.7(6)   | C10 | N1 | C7  | C9  | -61.7(5)  |

**Table 7** Hydrogen Atom Coordinates ( $\text{\AA} \times 10^4$ ) and Isotropic Displacement Parameters ( $\text{\AA}^2 \times 10^3$ ) for SW140328-1.

| Atom | <i>x</i> | <i>y</i> | <i>z</i> | U(eq) |
|------|----------|----------|----------|-------|
| H5   | -8888    | -3297    | 76       | 115   |
| H7   | -10834   | -297     | -596     | 100   |
| H4A  | -7240    | -379     | 797      | 171   |
| H4B  | -8829    | -1461    | 942      | 171   |
| H4C  | -9237    | 86       | 634      | 171   |
| H10  | -9048    | 1729     | -1978    | 123   |
| H8A  | -10973   | -1298    | -1764    | 166   |
| H8B  | -11528   | 219      | -2072    | 166   |
| H8C  | -12807   | -592     | -1526    | 166   |
| H11A | -7690    | -384     | -2410    | 223   |
| H11B | -5844    | 138      | -2083    | 223   |
| H11C | -6763    | 1017     | -2714    | 223   |
| H9A  | -11491   | 2388     | -1284    | 195   |
| H9B  | -10777   | 2276     | -480     | 195   |
| H9C  | -12695   | 1674     | -679     | 195   |



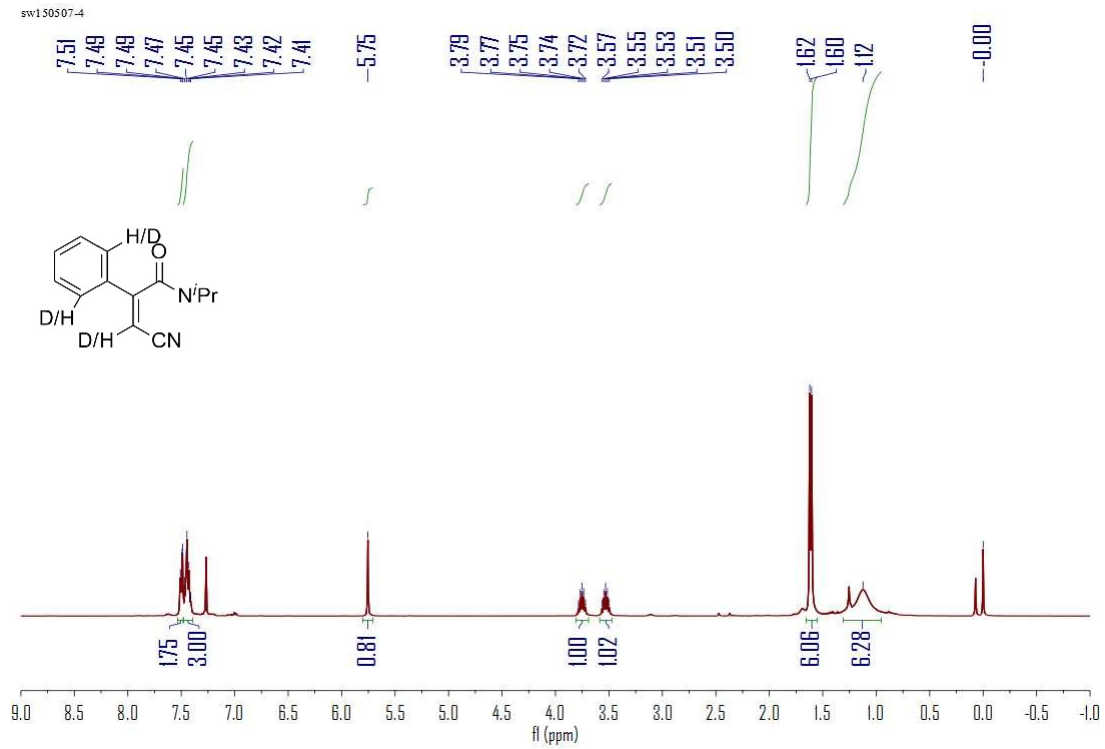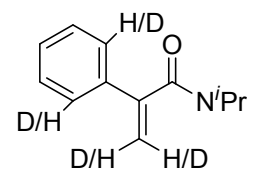

$^1\text{H}$  NMR (400 MHz,  $\text{CDCl}_3$ )  $\delta$  7.45 (d,  $J = 7.5$  Hz, 1.74H), 7.32 (m, 3H), 5.61 (m, 0.76H), 5.25 (m, 0.39H), 3.98 (dt,  $J = 13.3, 6.6$  Hz, 1H), 3.43 (dt,  $J = 13.5, 6.8$  Hz, 1H), 1.54 (d,  $J = 6.8$  Hz, 6H), 1.00 (d,  $J = 6.7$  Hz, 6H).

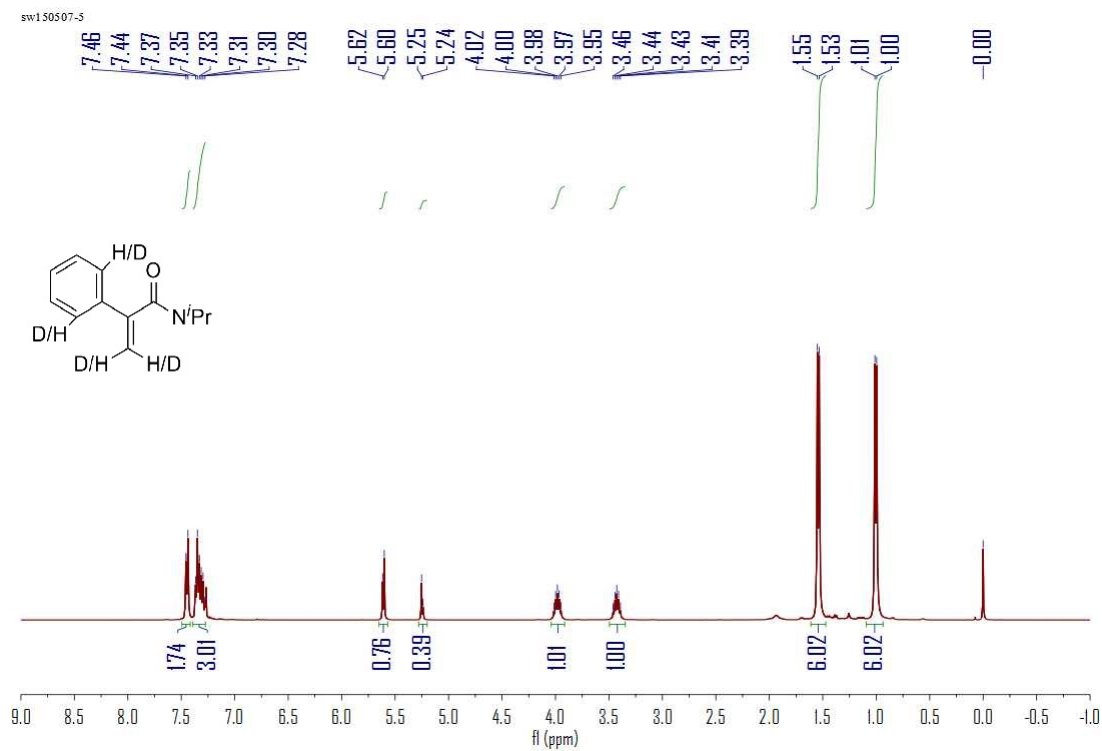

## References:

1. M. P. Huestis, L. Chan, D. R. Stuart, K. Fagnou, *Angew. Chem.*, 2011, **123**, 1374.
2. D. S. Ribeiro, P. R. Olivato, R. Rittner, *Magn. Reson. Chem.*, 2000, **38**, 627.
3. N. Kuhl, N. Schröder, F. Glorius, *Org. Lett.*, 2013, **15**, 3860.
4. T.-J. Gong, B. Xiao, W.-M. Cheng, W. Su, J. Xu, Z.-J. Liu, L. Liu, Y. Fu, *J. Am. Chem. Soc.*, 2013, **135**, 10636.
5. Y. Zhang, Y. Matsuo, C.-Z. Li, H. Tanaka, E. Nakamura, *J. Am. Chem. Soc.*, 2011, **133**, 8086.
